# Supplementary material for: Pretreatment maternal lifestyle and outcomes of assisted reproduction: an Italian cohort study
Source: PubMed Central journal article supplement — BMJ Open. 2020 Nov 26;10(11):e038837. doi: 10.1136/bmjopen-2020-038837 (PMC7692844; doi:10.1136/bmjopen-2020-038837), 2020-11-26
Supplement: bmjopen-2020-038837.draft_revisions.pdf [file bmjopen-2020-038837.draft_revisions.pdf]

# BMJ Open

BMJ Open is committed to open peer review. As part of this commitment we make the peer review history of every article we publish publicly available.

When an article is published we post the peer reviewers' comments and the authors' responses online. We also post the versions of the paper that were used during peer review. These are the versions that the peer review comments apply to.

The versions of the paper that follow are the versions that were submitted during the peer review process. They are not the versions of record or the final published versions. They should not be cited or distributed as the published version of this manuscript.

BMJ Open is an open access journal and the full, final, typeset and author-corrected version of record of the manuscript is available on our site with no access controls, subscription charges or pay-per-view fees (<http://bmjopen.bmj.com>).

If you have any questions on BMJ Open's open peer review process please email [info.bmjopen@bmj.com](mailto:info.bmjopen@bmj.com)

# BMJ Open

## Pre-treatment maternal lifestyle and outcomes of assisted reproduction: an Italian cohort study.

|                               |                                                                                                                                                                                                                                                                                                                                                                                                                                                                                                                                                                                                                                                                                                                                                                                                                                                                                                                                                                                                                                                                                                                                                                     |
|-------------------------------|---------------------------------------------------------------------------------------------------------------------------------------------------------------------------------------------------------------------------------------------------------------------------------------------------------------------------------------------------------------------------------------------------------------------------------------------------------------------------------------------------------------------------------------------------------------------------------------------------------------------------------------------------------------------------------------------------------------------------------------------------------------------------------------------------------------------------------------------------------------------------------------------------------------------------------------------------------------------------------------------------------------------------------------------------------------------------------------------------------------------------------------------------------------------|
| Journal:                      | <i>BMJ Open</i>                                                                                                                                                                                                                                                                                                                                                                                                                                                                                                                                                                                                                                                                                                                                                                                                                                                                                                                                                                                                                                                                                                                                                     |
| Manuscript ID                 | bmjopen-2020-038837                                                                                                                                                                                                                                                                                                                                                                                                                                                                                                                                                                                                                                                                                                                                                                                                                                                                                                                                                                                                                                                                                                                                                 |
| Article Type:                 | Original research                                                                                                                                                                                                                                                                                                                                                                                                                                                                                                                                                                                                                                                                                                                                                                                                                                                                                                                                                                                                                                                                                                                                                   |
| Date Submitted by the Author: | 25-Mar-2020                                                                                                                                                                                                                                                                                                                                                                                                                                                                                                                                                                                                                                                                                                                                                                                                                                                                                                                                                                                                                                                                                                                                                         |
| Complete List of Authors:     | Ricci, Elena; Ospedale Maggiore Policlinico, Dipartimento della Donna, del Neonato e del Bambino,<br>Noli, Stefania; Università degli Studi di Milano, Department of Clinical Sciences and Community Health, .<br>Ferrari, Stefania; Fondazione Ca' Granda Ospedale Maggiore policlinico, Infertility Unit<br>La Vecchia, Irene; Università degli Studi di Milano, Department of Clinical Sciences and Community Health, .<br>De Cosmi, Valentina; La Fondazione IRCCS Ospedale Maggiore Policlinico, Pediatric Intermediate Care Unit<br>Castiglioni, Marta; Università degli Studi di Milano, Department of Clinical Sciences and Community Health, .<br>Somigliana, Edgardo; Ospedale Maggiore Policlinico, Dipartimento della Donna, del Neonato e del Bambino,; Università degli Studi di Milano, Department of Clinical Sciences and Community Health, .<br>Agostoni, Carlo; University of Milan, Department of Pediatrics, Fondazione IRCCS Ca' Granda-Ospedale Maggiore Policlinico<br>Cipriani, Sonia<br>Mauri, Paola; Università degli Studi di Milano, Department of Clinical Sciences and Community Health, .<br>Parazzini, Fabio; University of Milan, |
| Keywords:                     | Reproductive medicine < GYNAECOLOGY, Subfertility < GYNAECOLOGY, EPIDEMIOLOGY                                                                                                                                                                                                                                                                                                                                                                                                                                                                                                                                                                                                                                                                                                                                                                                                                                                                                                                                                                                                                                                                                       |
|                               |                                                                                                                                                                                                                                                                                                                                                                                                                                                                                                                                                                                                                                                                                                                                                                                                                                                                                                                                                                                                                                                                                                                                                                     |

SCHOLARONE™  
Manuscripts

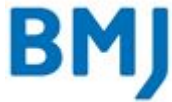

I, the Submitting Author has the right to grant and does grant on behalf of all authors of the Work (as defined in the below author licence), an exclusive licence and/or a non-exclusive licence for contributions from authors who are: i) UK Crown employees; ii) where BMJ has agreed a CC-BY licence shall apply, and/or iii) in accordance with the terms applicable for US Federal Government officers or employees acting as part of their official duties; on a worldwide, perpetual, irrevocable, royalty-free basis to BMJ Publishing Group Ltd ("BMJ") its licensees and where the relevant Journal is co-owned by BMJ to the co-owners of the Journal, to publish the Work in this journal and any other BMJ products and to exploit all rights, as set out in our [licence](#).

The Submitting Author accepts and understands that any supply made under these terms is made by BMJ to the Submitting Author unless you are acting as an employee on behalf of your employer or a postgraduate student of an affiliated institution which is paying any applicable article publishing charge ("APC") for Open Access articles. Where the Submitting Author wishes to make the Work available on an Open Access basis (and intends to pay the relevant APC), the terms of reuse of such Open Access shall be governed by a Creative Commons licence – details of these licences and which [Creative Commons](#) licence will apply to this Work are set out in our licence referred to above.

Other than as permitted in any relevant BMJ Author's Self Archiving Policies, I confirm this Work has not been accepted for publication elsewhere, is not being considered for publication elsewhere and does not duplicate material already published. I confirm all authors consent to publication of this Work and authorise the granting of this licence.

1  
2  
3 **Pre-treatment maternal lifestyle and outcomes of assisted reproduction: an Italian**  
4  
5 **cohort study.**  
6

7 Elena Ricci,<sup>1</sup> Stefania Noli,<sup>2</sup> Stefania Ferrari,<sup>2</sup> Irene La Vecchia,<sup>2</sup> Valentina De Cosmi,<sup>3</sup> Marta  
8 Castiglioni,<sup>2</sup> Edgardo Somigliana,<sup>1,2</sup> Carlo Agostoni,<sup>4</sup> Sonia Cipriani,<sup>1</sup> Paola Agnese Mauri,<sup>2</sup>  
9  
10 Fabio Parazzini,<sup>1,2</sup>  
11  
12

13  
14 1 Department of Woman, Newborn and Child, Fondazione Istituto di Ricovero e Cura a Carattere Scientifico  
15 (IRCCS) Ca' Granda Ospedale Maggiore Policlinico, Milan, Italy.  
16

17  
18 2 Department of Clinical Sciences and Community Health, Università degli Studi di Milano, Milan, Italy.  
19

20 3 Pediatric Intermediate Care Unit, Fondazione IRCCS Ospedale Ca' Granda-Ospedale Maggiore Policlinico;  
21 Department of Clinical Sciences and Community Health, University of Milan, Branch of Medical Statistics,  
22 Biometry, and Epidemiology "G. A. Maccacaro", Milan, Italy  
23  
24

25  
26 4 Pediatric Intermediate Care Unit, Fondazione IRCCS Ospedale Ca' Granda-Ospedale Maggiore Policlinico,  
27 and Department of Clinical Sciences and Community Health, University of Milan, Milan, Italy.  
28  
29

30  
31  
32 **Corresponding author:**  
33

34 Elena Ricci,  
35

36 Department of Woman, Newborn and Child,  
37

38 Fondazione Istituto di Ricovero e Cura a Carattere Scientifico (IRCCS) Ca' Granda Ospedale  
39 Maggiore Policlinico  
40  
41

42 Via Commenda, 12 - 20122 Milan, Italy  
43

44 Tel: +39.02.5503; fax: +39.02.5503; e-mail: [ed.ricci@libero.it](mailto:ed.ricci@libero.it)  
45  
46

47  
48 **Short title:** Maternal lifestyle and ART outcomes  
49

50 **Word count:** 3223  
51  
52  
53  
54  
55  
56  
57  
58  
59  
60

## Abstract

**Objective.** We investigated whether lifestyle affects assisted reproduction technique (ART) outcomes.

**Design.** Prospective cohort study.

**Setting.** Italian Fertility Unit.

**Participants.** Women from couples presenting for evaluation and eligible for ART were invited to participate. Information on alcohol intake, current smoking and leisure physical activity during the year before the interview was collected, using a structured questionnaire. We considered the ART outcomes of the cycle immediately following the interview.

**Primary and secondary outcome measures.** The primary outcome measure was clinical pregnancy rate. Secondary measures were number of retrieved oocytes, implantation and live birth.

**Results.** Out of 492 cycles, 427 (86.8%) resulted in embryo transfer, 157 (31.9%) in clinical pregnancy, 121 (24.6%) in live birth. In women in the 3<sup>rd</sup> tertile of alcohol intake, adjusted relative risk (ARR) was 1.32 (95% confidence interval (CI) 0.71-2.47), 1.05 (95% CI 0.89-1.23) and 1.05 (95% CI 0.92-1.19) for implantation, clinical pregnancy and live birth failure respectively. The corresponding figures in women currently smoking more than 5 cigarettes/day were 1.13 (95% CI 0.46-2.80), 1.04 (95% CI 0.84-1.29), and 0.98 (95% CI 0.83-1.16), and in women with physical activity  $\geq 5$  hours/week were 1.75 (95% CI 0.91-3.40), 1.11 (95% CI 0.96-1.28), and 1.10 (95% CI 0.95-1.28) respectively.

**Conclusion.** Conservatively, all women seeking pregnancy should be advised to limit alcohol drinking and, of course, smoking, while maintaining moderate level of physical activity.

**Keywords.** Alcohol intake, smoking habits, leisure physical activity, assisted reproduction techniques, pregnancy, live birth.

### Strengths and limitations of this study

- This study analysed several lifestyle factors of women interviewed in the same institution, participation was practically complete, and information on nutritional status was also available.
- Smoking and drinking habits were self-reported by women, so some underestimates could have occurred.
- Smoking and drinking aside, this study offer information about physical activity in the period preceding assisted reproduction, a factor still under discussion.

## Introduction

Alcohol consumption and smoking are among the most common lifestyle exposures in women. During the last decades, the relationship between these lifestyle factors and spontaneous fertility has been investigated in several observational studies: some have shown that alcohol and smoking affect spontaneous fertility (Hassan & Killick, 2004; Oboni, Marques-Vidal, Bastardot, Vollenweider, & Waeber, 2016), although not consistently (Hawkins Bressler et al., 2016; Mikkelsen et al., 2016).

These exposures may contribute to spontaneous reproductive failures, but they may also impair the success rate of assisted reproduction technology (ART). Thus, it is conceivable that modifying such lifestyle habits before treatments could reduce the need for ART procedures and/or enhance the likelihood of in vitro fertilization (IVF) success. In a study conducted in California, alcohol intake was negatively associated with the number of oocytes retrieved, but not with live birth rate (Klonoff-Cohen, Lam-Kruglick, & Gonzalez, 2003). Otherwise, in a prospective cohort study, no association emerged between alcohol intake during days 4–10 of ovarian stimulation and IVF outcomes (Firms et al., 2015). A recent systematic revision of literature confirmed that average alcohol intake before ART initiation did not impact on the outcomes, whereas intake at the start of ART cycle had a negative effect on fertilization, embryo quality and implantation (Mínguez-Alarcón, Chavarro, & Gaskins, 2018).

Cigarette smoking is the most common lifestyle factor that could affect IVF outcomes and several studies have demonstrated the negative effect of smoking on pregnancy rate and upon clinical outcome of ART (Waylen, Metwally, Jones, Wilkinson, & Ledger, 2009). However, literature on this issue is still limited (Hornstein, 2016), although a recent meta-analysis (Budani, Fensore, Di Marzio M, & Tiboni, 2018) found that current smokers undergoing ART had lower clinical pregnancy and live birth rate than non-smokers and experienced a significant increase of spontaneous miscarriage.

1  
2  
3 Evidence on physical activity (PA) was inconsistent: although data from the Nurses' Health  
4 Study II suggested that vigorous activity may reduce ovulatory infertility (Rich-Edwards et  
5 al., 2002), a Norwegian cohort indicated that high intensity and frequency of PA increase sub-  
6 fertility (Gudmundsdottir, Flanders, & Augestad, 2009). Studies specifically on PA and ART  
7 success were equally inconsistent: investigating pre-treatment PA, Morris et al. (Morris et al.,  
8 2006) found that women undergoing ART had a 40% reduced likelihood of live birth, if  
9 engaged in PA 4 hours or more per week for less than 10 years, compared with women not  
10 regularly engaged in PA. Another study (Kucuk, Doymaz, & Urman, 2010) did not find a  
11 beneficial effect of activity levels before treatment on clinical outcomes, although moderate  
12 PA during ART cycle was associated with higher implantation and live birth rates. Recently,  
13 it was suggested that health-promoting lifestyle education may increase the success rates of  
14 ART, correcting risk factors that negatively affect fertility (Kaya, Kizilkaya Beji, Aydin, &  
15 Hassa, 2016). This evidence has been recently reviewed: pooled estimates from a systematic  
16 research found that physical activity before ART cycles was associated with increased rates of  
17 clinical pregnancy and live births, but no effect was shown on miscarriage rate (Rao, Zeng, &  
18 Tang, 2018).

19  
20 Alcohol consumption (World Health Organisation (WHO), 2014), smoking habits (Marcon et  
21 al., 2018) and physical activity (Gomes et al., 2017; Luyen et al., 2017) largely differ in  
22 different populations. Thus, it is interesting to analyse the role of these lifestyles on fertility  
23 treatment in an Italian setting, using data from a prospective cohort study conducted in an  
24 Italian Fertility Centre.

## 25 26 27 **Methods**

28 From September 2014 to December 2016, in randomly selected days, sub-fertile couples,  
29 presenting for evaluation to the Fertility Unit of Fondazione IRCCS Ca' Granda, Ospedale  
30  
31  
32  
33  
34  
35  
36  
37  
38  
39  
40  
41  
42  
43  
44  
45  
46  
47  
48  
49  
50  
51  
52  
53  
54  
55  
56  
57  
58  
59  
60



1  
2  
3 Maggiore, Policlinico, Milan, and eligible for ART, were invited to participate into a  
4 prospective cohort study on the role of lifestyle habits and diet on ART outcomes. The study  
5 protocol was approved by the Institutional Ethical Review Board. All procedures were in  
6 accord with the Helsinki Declaration and all participants provided written informed consent.  
7  
8  
9

10  
11  
12  
13 Study participation was proposed during the diagnostic phase. Couples were interviewed on  
14 the day of oocyte retrieval. The time interval between the proposal of the study and the  
15 interview was generally less than one month.  
16  
17  
18

19  
20  
21 The overall participation rate was close to 95%, mainly since couples were interviewed during  
22 the period spent waiting for the different diagnostic stages, before actual ART procedures,  
23 and the not sensitive character of questions.  
24  
25  
26

27  
28 Both partners of couples who agreed to participate were interviewed by centrally trained  
29 personnel, using a standard questionnaire to obtain information on general socio-demographic  
30 characteristics, anthropometric variables, personal medical history and reproductive history,  
31 and lifestyle factors. Couples that cannot speak Italian were excluded from the study.  
32  
33  
34  
35  
36

### 37 38 *Patient and public involvement.*

39  
40  
41 Patients were not involved in the design, recruitment or conduct of the study.  
42  
43

44  
45 The present study reported on the outcome of the cycle immediately following the interview.  
46  
47

### 48 *Procedures*

49  
50  
51 Patients were asked to report about their usual weekly food consumption in the last year,  
52 using a reproducible and valid food frequency questionnaire (Decarli et al., 1996; Franceschi  
53 et al., 1995, 1993), including the weekly numbers of drinks for several alcoholic beverages.  
54  
55  
56 The questionnaire was satisfactorily reproducible (D'Avanzo, La Vecchia, Katsouyanni,  
57  
58  
59  
60

1  
2  
3 Negri, & Trichopoulos, 1996). Taking into account the different ethanol concentration, one  
4 unit corresponded to approximately 125 ml of wine, 330 ml of beer and 30 ml of hard liquor  
5 (i.e., about 12.5 g of ethanol). Total alcohol intake, expressed in grams of ethanol per day  
6 (g/day), was computed as the sum of all reported alcoholic beverages. “Never drinkers” and  
7 “Ex- drinkers” were patients who abstained from drinking lifelong and for at least 12 months  
8 at the time of interview, respectively. For the purpose of this study, we considered these two  
9 groups of women in the same category “Abstainers”.

10  
11  
12 A woman was considered a smoker if she had smoked  $\geq$  one cigarette/day for at least one  
13 year; a former smoker if she had smoked  $\geq$  one cigarette/day for at least one year, but had  
14 stopped more than one year before the interview, and a non-smoker if she had never smoked  $\geq$   
15 one cigarette/day.

16  
17  
18 The adherence to the Mediterranean diet was assessed through an a priori score  
19 (Mediterranean diet score, MDS), developed by Trichopoulou and colleagues (Trichopoulou,  
20 Costacou, Bamia, & Trichopoulos, 2003) and calculated as previously published (E. Ricci et  
21 al., 2019). To include MDS score in the analysis of alcohol intake, it was recalculated  
22 excluding alcohol. Satisfactory reproducibility of questions on self-reported smoking and  
23 drinking habits in our study populations has been previously reported (Ferraroni et al., 1996).

24  
25  
26 Leisure PA was defined as the number of hours per week of a sport or activity such as  
27 walking, gardening, cycling, etc., in the year preceding the interview. Scores ranged between  
28 1 and 4, corresponding to  $<2$ , 2–4, 5–7 and  $>7$  h of PA per week. No information was  
29 available on intensity of activity.

30  
31  
32 Patients were managed according to a standardized clinical protocol as reported in details  
33 elsewhere (Benaglia et al., 2013; Elena Ricci et al., 2018). The choice between conventional  
34 IVF or Intra-Cytoplasmatic Sperm Injection (ICSI) was made based on semen characteristics.

1  
2  
3 Good quality oocytes were those in metaphase I-II for IVF and metaphase II for ICSI. In this  
4  
5 analysis, we considered as outcome the best one obtained using the oocytes retrieved in the  
6  
7 cycle immediately following the interview. For example, if a woman did not achieve a  
8  
9 pregnancy with a fresh embryo transfer, but subsequently a frozen embryo from the same  
10  
11 cycle led to a clinical pregnancy, we considered the clinical pregnancy as the main outcome.  
12  
13  
14 All clinical information (including infertility diagnosis) was collected from medical records.  
15  
16

### 17 ***Statistical analysis***

18  
19 Clinical pregnancy was considered the main objective of the study. Considering a 30% of  
20  
21 pregnancy rate per cycle, as usual in our Fertility Centre, this study was powered to detect a  
22  
23 1.5 increase of risk in the highest tertile of intake as compared to the lowest ( $\alpha=0.05$ ,  $\beta=0.80$ ).  
24  
25 Multiple outcomes were considered: 1. Number of retrieved good quality oocytes; 2. Embryo  
26  
27 transfer; 3. Clinical pregnancy; 4. Live birth. Patients who failed each treatment stage were  
28  
29 included in the following stage as failures.  
30  
31

32  
33 Categorical variables were described as frequency (N) and percentage (%) and compared  
34  
35 using the Pearson or Mantel-Haenzsel chi-square, as appropriate. Continuous variables were  
36  
37 described as mean and standard deviation (SD) if normally distributed, or median and  
38  
39 interquartile range (IQR) if not normally distributed and analysed using analysis of variance  
40  
41 and Kruskal-Wallis test respectively.  
42  
43

44  
45 We used multivariable generalized linear mixed models to evaluate the association of  
46  
47 exposure variables with treatment outcomes. We used a Poisson distribution and log link  
48  
49 function for the number of good quality oocytes retrieved, and binomial distribution and logit  
50  
51 link function for clinical outcomes. We estimated relative risks (RRs) of each clinical  
52  
53 outcome and corresponding 95% CIs in categories of alcohol intake (approximate tertiles),  
54  
55 former and current smoking (no,  $\leq 5$ ,  $>5$  cigarettes/day) and leisure PA ( $<2$ , 2-4,  $\geq 5$   
56  
57 hours/week) in the year before the interview.  
58  
59  
60

To account for potential confounders, we included terms for variables, that were associated with these modifiable lifestyles, and/or with at least one ART outcome, in the general linear model and multiple log-binomial regression models (as indicated in table footnotes). Terms for interaction were tested.

All the analyses were performed using the SAS software, version 9.4 (SAS Institute, Inc., Cary, NC, USA).

## Results

From September 2014 to December 2016, out of 501 women undergoing ART cycle, 9 (1.8%) did not provide complete information about their lifestyle, or were lost to follow-up, and were excluded from this analysis. Analysis was then performed on 492 ART cycle outcomes from 492 women.

Mean age was 36.6 years (standard deviation, SD, 3.6 range 27-45) and mean body mass index (BMI) was 22.3 kg/m<sup>2</sup> (SD 3.9, range 16.4-41.7). Thirty women (6.1%) were obese (BMI  $\geq$  30.0 kg/m<sup>2</sup>).

The characteristics of women according to alcohol, smoking habits and PA are shown in Table 1.

Only 16 women (3.2%) exercised more than 7 hours per week, so we merged the two categories 5-7 and >7 hours/week. Leisure PA was associated with college degree and higher MDS, and inversely with daily calories intake.

Of the 492 initiated cycles, 427 (86.8%) resulted in embryo transfer, 157 (31.9%) in clinical pregnancy, 121 (24.6%) in live births. Out of 36 clinical pregnancies not resulting in live birth, 34 ended with miscarriage, one with an induced abortion, and one was extra-uterine.

Age was the main risk factor for ART failure. The median of good quality oocytes was 6 (IQR 4-9) in women <35 years old, 5 (IQR 3-8) in 35-39, 3 (IQR 2-6) in women aged  $\geq$  40

1  
2  
3 years ( $p < 0.0001$ ). No association was observed at univariate analysis with alcohol intake,  
4  
5 current smoking or leisure PA. As compared to women aged  $< 35$ , RR for not achieving  
6  
7 embryo transfer was 2.01 (95% CI 1.03-3.93) for women aged 35-39 and 2.29 (95% CI 1.11-  
8  
9 4.72) for those aged  $\geq 40$  years. The corresponding figures were 1.16 (95% CI 0.98-1.37) and  
10  
11 1.40 (95% CI 1.18-1.66) for clinical pregnancy; 1.19 (95% CI 1.03-1.37) and 1.37 (95% CI  
12  
13 1.19-1.78) for live birth.

14  
15  
16 At univariate analysis, leisure PA  $\geq 5$  hours/week was significantly associated with higher  
17  
18 risk of not achieving clinical pregnancy (RR 1.25, 95% CI 1.08-1.45), whereas no relationship  
19  
20 was observed with embryo transfer and live birth. Alcohol intake and current smoking were  
21  
22 not significantly associated with any ART outcomes.

23  
24  
25 Table 2 shows the relation between exposures and clinical results, accounting for potential  
26  
27 confounders. No significant association was observed between smoking, alcohol intake and  
28  
29 leisure PA, thus they were not mutually adjusted. Terms for interaction between smoking,  
30  
31 alcohol intake and leisure PA did not show any significance and were excluded from the final  
32  
33 models.

34  
35  
36 In this sample, 28 (5.7%) women drank at least 1 alcohol unit per day. Although the ARR for  
37  
38 embryo transfer failure was higher, it was not significant as compared to abstainers, and no  
39  
40 effect was observed on other outcomes. ARR for embryo transfer failure was significantly  
41  
42 higher in six women who smoked  $\geq 20$  cigarettes/day during the year before ART procedure.  
43  
44 Former smokers who stopped smoking more than 5 years before undergoing ART had a  
45  
46 higher number of oocytes than never smokers.

47  
48  
49 Finally, we controlled these results for partner's lifestyle, in a subgroup of 324 couples with  
50  
51 complete information for both male and female. As regards to women lifestyle, results did not  
52  
53 change. Men's lifestyle (smoking, alcohol drinking and physical activity) did not significantly  
54  
55 impact on ART outcomes.

## Discussion

In this sample of women referring to an Italian Fertility centre, lifestyle habits did not play a significant role in the outcome of ART, except for heavy smoking, that was associated with fewer good quality oocytes and worse outcome of embryo transfer.

### *Alcohol*

The role of alcohol intake on spontaneous fertility has been associated with decreased fertility and chance of conception (Eggert, Theobald, & Engfeldt, 2004; Jensen et al., 1998; Mikkelsen et al., 2016). A recent meta-analysis of observational studies, including about 100,000 women, suggested that alcohol consumption was associated with reduced fecundability (Fan et al., 2017). In biological terms, alcohol may lower fertility affecting endogenous hormone levels (Rossi et al., 2011) and embryo quality (Wdowiak, Sulima, Sadowska, Bakalczuk, & Bojar, 2014).

The role of alcohol intake on ART success rate has been analysed in some studies showing inconsistent results (Abadia et al., 2017; Firms et al., 2015; Gormack et al., 2015; Klonoff-Cohen et al., 2003). These differences may be partially due to the high heterogeneity between studies, in particular in terms of intake prevalence. For example, in Boston, US, a study, found that 30% of women reporting >1 unit/day of alcohol intake had an increased risk of adverse outcome, but no association between low to moderate alcohol consumption was observed (Abadia et al., 2017). Literature suggests that alcohol drinking at start of ART may exert a detrimental effect, but the evidence is still limited (Mínguez-Alarcón et al., 2018).

Along this line, we did not find any association between alcohol intake and ART outcomes, but we were not able to analyse the effect of high alcohol intake, present in only 5.7% of our sample.

### *Smoking*

1  
2  
3 Since it appears to have a detrimental effect on spontaneous fertility (Dechanet et al., 2011;  
4 Hassan & Killick, 2004), it has been suggested that cigarette smoking may affect IVF  
5 outcomes as well.  
6  
7

8  
9  
10 However, individual studies available on this issue do not always support a significant  
11 association between smoking and IVF success or oocyte quality. For example, in a study  
12 conducted in Australia in women undergoing IVF (Firms et al., 2015), the mean number of  
13 oocytes did not significantly differ between regular smokers (11.1, SD 6.5), ex-smokers (11.8,  
14 SD 10.1) or non-smokers (11.2, SD 7.6), indicating that smoking might not influence oocytes  
15 production. Interestingly, the same analysis showed that fertilization rates were not influenced  
16 by current smoking status but decreased as years of smoking increased ( $p < 0.001$ ).  
17  
18

19  
20 In a large Dutch nationwide retrospective analysis conducted on 8457 patients (Lintsen et al.,  
21 2005), no significant difference was observed in the mean number of oocytes retrieved  
22 between non-smokers and smokers, yet there were significantly lower clinical pregnancy and  
23 live birth rates for smoking patients.  
24  
25

26  
27 These findings regarding clinical pregnancies and live birth rate were further confirmed by  
28 more recent meta-analysis and reviews (Hornstein, 2016; Waylen et al., 2009). As regards to  
29 former smokers, they tend to have better ART outcomes than current smokers (Mínguez-  
30 Alarcón et al., 2018), but the evidence is scanty about the influence of smoking cessation on  
31 ART outcomes.  
32  
33

34  
35 Vanegas et al. suggested that male smoking could also be associated with ART outcomes  
36 (Vanegas et al., 2017). Whereas male current smoking did not affect the different stages of  
37 ART (egg retrieval, fertilization, embryo transfer, implantation, clinical pregnancy and  
38 livebirth), among past smokers every additional year since a man had quit smoking reduced  
39 the risk of failing ART by 4%, particularly between clinical pregnancy and live birth.  
40  
41  
42  
43  
44  
45  
46  
47  
48  
49  
50  
51  
52  
53  
54  
55  
56  
57  
58  
59  
60

1  
2  
3 In our sample, good quality oocytes number was significantly lower in women who had  
4 smoked 20 or more cigarettes per day in the year before ART procedure, as compared to  
5 never smokers as well as to women currently smoking 5 or less cigarettes/day, and risk of  
6 embryo transfer failure was significantly higher than in never smokers. No significant effect  
7 was observed on clinical pregnancy and live birth. However, only six women had such a high  
8 level of smoking, thus our estimates should be considered with caution. Male smoking did not  
9 appear as a contributing factor to ART failure.  
10  
11  
12  
13  
14  
15  
16  
17  
18  
19  
20

### 21 *Leisure Physical Activity*

22 Findings from literature are inconsistent. Among 2,232 patients prospectively enrolled before  
23 their first IVF cycle, Morris et al. (Morris et al., 2006) found that women who exercised 4 or  
24 more hours per week, for 1-9 years before ART cycle, were more likely to experience an  
25 implantation failure (OR 2.0, 95% CI 1.4-3.1) or pregnancy loss (OR 2.0, CI 1.2-3.4) than  
26 women who did not report exercise.  
27  
28  
29  
30  
31  
32  
33

34 On the contrary, in a group of 131 women (Kucuk et al., 2010) those who were physically  
35 more active during the ART procedure were more likely to have an increased implantation  
36 rate and a live birth; none of these women met the criteria for high PA, so that the comparison  
37 was done between low and moderate PA. On the same line, an observational study (Evenson  
38 et al., 2014) found that a self-reported active lifestyle in the preceding year affected  
39 favourably the ART outcome in 121 women, with clinical pregnancy more likely in women  
40 with a level above median for each kind of activity: active living (OR 1.96, 95% CI 1.09-  
41 3.50), sports/exercise (OR 1.48, 95% CI 1.02–2.15), and total activity (OR 1.52, 95% CI  
42 1.15–2.01). Recently, findings from the EARTH Study (Gaskins et al. 2016) suggested that  
43 time spent in moderate-to-vigorous physical activities before IVF was not associated with  
44 probability of implantation, clinical pregnancy or live birth, in 273 women who underwent  
45  
46  
47  
48  
49  
50  
51  
52  
53  
54  
55  
56  
57  
58  
59  
60



1  
2  
3 427 IVF cycles. Pooled estimates from a recent meta-analysis (Rao et al., 2018) suggested a  
4  
5 beneficial effect of PA on ART outcomes, and no effect on spontaneous abortion; despite this,  
6  
7 study results are widely heterogeneous.  
8

9  
10 In our sample, an increased risk of embryo transfer failure was suggested in women with  $\geq 5$   
11  
12 hours/week of leisure PA, but this result was not significant in the multivariable analysis.  
13

### 14 ***Strengths and Limitations.***

15  
16 Potential limitations should be considered. All information on smoking and drinking was self-  
17  
18 reported by women, so some underestimates could have occurred. However, in Italy, alcohol  
19  
20 consumption is socially accepted and recommendations to avoid alcohol to protect fertility  
21  
22 have not received widespread attention and are not routinely advocated by gynaecologists  
23  
24 before IVF.  
25  
26

27  
28 Other sources of bias, including selection or confounding factors, are also unlikely to have  
29  
30 produced marked effects, especially considering that all women were interviewed in the same  
31  
32 institution and that participation was practically complete. Moreover, we analysed  
33  
34 information on nutritional status, and their inclusion into the model did not change the  
35  
36 estimated RRs.  
37  
38

39  
40 Comparing the clinical pregnancy percentage in women who did not drink at all and those in  
41  
42 the 3<sup>rd</sup> tertile of intake, the power of detecting a significant difference was about 13%. Using  
43  
44 our data, with 30% prevalence of abstainers, we could identify a RR of not achieving clinical  
45  
46 pregnancy of 1.8 for drinkers.  
47

48  
49 Lastly, this study only included women presenting for ART, thus the findings are not  
50  
51 generalizable to the wider population.  
52

### 53 **Conclusions**

54  
55 Our study did not show an effect of alcohol consumption, current smoking and leisure  
56  
57 physical activity on number of good quality oocytes and success rate after ART procedures.  
58  
59  
60

1  
2  
3 Considering that reassuring results of our study were related to moderate alcohol intake and  
4 cigarette smoking, conservatively, all women seeking pregnancy should be advised to limit or  
5 avoid alcohol drinking and, of course, smoking. Moderate physical activity as a part of a  
6 healthy lifestyle is also advisable, although current knowledge does not support convincing  
7 evidence of a direct beneficial effect.  
8  
9  
10  
11  
12  
13  
14  
15  
16  
17  
18  
19  
20  
21  
22  
23  
24  
25  
26  
27  
28  
29  
30  
31  
32  
33  
34  
35  
36  
37  
38  
39  
40  
41  
42  
43  
44  
45  
46  
47  
48  
49  
50  
51  
52  
53  
54  
55  
56  
57  
58  
59  
60

For peer review only

**Declarations****Ethics approval and consent to participate.**

The study protocol was approved by the Ethical Review Board of Fondazione IRCCS Ca' Granda Ospedale Maggiore Policlinico, Milano Area B (reference number 2616, 1421/2014).

All patients included gave their written informed consent to participate in the study.

**Availability of data and materials.**

The dataset analysed during the current study is available from the corresponding author on reasonable request.

**Competing interests.**

The authors declare that they do not have any competing interests.

**Funding**

No funding was obtained for this study.

**Authors' contribution**

FP and ILV designed the research study; MC, ES, PAM and SN contributed to data acquisition and interpretation; ER, SC and VDC analysed the data; SF, ES, CA and FP interpreted the information and wrote the paper.

**Acknowledgements**

We are indebted with Marco Reschini, Benedetta Gallotti e Maria Cavadini for their valuable contribution to data collection and patients' counselling, and with Francesca Bravi for her support to data analysis.

## References

- Abadia, L., Chiu, Y. H., Williams, P. L., Toth, T. L., Souter, I., Hauser, R., ... Gaskins, A. J. (2017). The association between pretreatment maternal alcohol and caffeine intake and outcomes of assisted reproduction in a prospectively followed cohort. *Human Reproduction*, *32*, 1846–1854. <https://doi.org/10.1093/humrep/dex237>
- Benaglia, L., Bermejo, A., Somigliana, E., Faulisi, S., Ragni, G., Fedele, L., & Garcia-Velasco, J. A. (2013). In vitro fertilization outcome in women with unoperated bilateral endometriomas. *Fertility and Sterility*, *99*, 1714–1719. <https://doi.org/10.1016/j.fertnstert.2013.01.110>
- Budani, M., Fensore, S., Di Marzio, M., & Tiboni, G. (2018). Cigarette smoking impairs clinical outcomes of assisted reproductive technologies: A meta-analysis of the literature. *Reprod Toxicol*, *80*, 49–59.
- D'Avanzo, B., La Vecchia, C., Katsouyanni, K., Negri, E., & Trichopoulos, D. (1996). Reliability of information on cigarette smoking and beverage consumption provided by hospital controls. *Epidemiology*, *7*, 312–315. <https://doi.org/10.2307/3702870>
- Decarli, A., Franceschi, S., Ferraroni, M., Gnagnarella, P., Parpinel, M. T., La Vecchia, C., ... Giacosa, A. (1996). Validation of a food-frequency questionnaire to assess dietary intakes in cancer studies in Italy: Results for specific nutrients. *Annals of Epidemiology*, *6*, 110–118. [https://doi.org/10.1016/1047-2797\(95\)00129-8](https://doi.org/10.1016/1047-2797(95)00129-8)
- Dechanet, C., Anahory, T., Mathieu Daude, J. C., Quantin, X., Reyftmann, L., Hamamah, S., ... Dechaud, H. (2011). Effects of cigarette smoking on reproduction. *Human Reproduction Update*, *17*, 79–95. <https://doi.org/10.1093/humupd/dmq033>
- Eggert, J., Theobald, H., & Engfeldt, P. (2004). Effects of alcohol consumption on female fertility during an 18-year period. *Fertility and Sterility*, *81*, 379–383. <https://doi.org/10.1016/j.fertnstert.2003.06.018>

- 1  
2  
3 Evenson, K. R., Calhoun, K. C., Herring, A. H., Pritchard, D., Wen, F., & Steiner, A. Z.  
4  
5 (2014). Association of physical activity in the past year and immediately after in vitro  
6 fertilization on pregnancy. *Fertility and Sterility*, *101*, 1047–1054.  
7  
8 <https://doi.org/10.1016/j.fertnstert.2013.12.041>  
9  
10  
11  
12 Fan, D., Liu, L., Xia, Q., Wang, W., Wu, S., Tian, G., ... Liu, Z. (2017). Female alcohol  
13 consumption and fecundability: A systematic review and dose-response meta-analysis.  
14  
15 *Scientific Reports*, *7*, 13815. <https://doi.org/10.1038/s41598-017-14261-8>  
16  
17  
18  
19 Ferraroni, M., Decarli, A., Franceschi, S., La Vecchia, C., Enard, L., Negri, E., ... Salvini, S.  
20  
21 (1996). Validity and reproducibility of alcohol consumption in Italy. *International*  
22 *Journal of Epidemiology*, *25*, 775–782. <https://doi.org/10.1093/ije/25.4.775>  
23  
24  
25  
26 Firms, S., Cruzat, V. F., Keane, K. N., Joesbury, K. A., Lee, A. H., Newsholme, P., & Yovich,  
27  
28 J. L. (2015). The effect of cigarette smoking, alcohol consumption and fruit and  
29 vegetable consumption on IVF outcomes: A review and presentation of original data.  
30  
31 *Reproductive Biology and Endocrinology*, p. 13. [https://doi.org/10.1186/s12958-015-](https://doi.org/10.1186/s12958-015-0133-x)  
32  
33  
34  
35  
36  
37  
38 Franceschi, S., Barbone, F., Negri, E., Decarli, A., Ferraroni, M., Filiberti, R., ... La Vecchia,  
39  
40 C. (1995). Reproducibility of an Italian food frequency questionnaire for cancer studies.  
41  
42 Results for specific nutrients. *Annals of Epidemiology*, *5*, 69–75.  
43  
44 [https://doi.org/10.1016/1047-2797\(95\)92893-D](https://doi.org/10.1016/1047-2797(95)92893-D)  
45  
46  
47 Franceschi, S., Negri, E., Salvini, S., Decarli, A., Ferraroni, M., Filiberti, R., ... La Vecchia,  
48  
49 C. (1993). Reproducibility of an Italian food frequency questionnaire for cancer studies:  
50  
51 Results for specific food items. *European Journal of Cancer*, *29*, 2298–2305.  
52  
53 [https://doi.org/10.1016/0959-8049\(93\)90225-5](https://doi.org/10.1016/0959-8049(93)90225-5)  
54  
55  
56 Gomes, M., Figueiredo, D., Teixeira, L., Poveda, V., Paúl, C., Santos-Silva, A., & Costa, E.  
57  
58 (2017). Physical inactivity among older adults across Europe based on the SHARE  
59  
60

- 1  
2  
3 database. *Age and Ageing*, 46, 71–77. <https://doi.org/10.1093/ageing/afw165>  
4  
5 Gormack, A. A., Peek, J. C., Derraik, J. G. B., Gluckman, P. D., Young, N. L., & Cutfield, W.  
6  
7 S. (2015). Many women undergoing fertility treatment make poor lifestyle choices that  
8  
9 may affect treatment outcome. *Human Reproduction*, 30, 1617–1624.  
10  
11 <https://doi.org/10.1093/humrep/dev094>  
12  
13  
14 Gudmundsdottir, S. L., Flanders, W. D., & Augestad, L. B. (2009). Physical activity and  
15  
16 fertility in women: The North-Trøndelag Health Study. *Human Reproduction*, 24, 3196–  
17  
18 3204. <https://doi.org/10.1093/humrep/dep337>  
19  
20  
21 Hassan, M. A. M., & Killick, S. R. (2004). Negative lifestyle is associated with a significant  
22  
23 reduction in fecundity. *Fertility and Sterility*, 81, 384–392.  
24  
25 <https://doi.org/10.1016/j.fertnstert.2003.06.027>  
26  
27  
28 Hawkins Bressler, L., Bernardi, L. A., De Chavez, P. J. D., Baird, D. D., Carnethon, M. R., &  
29  
30 Marsh, E. E. (2016). Alcohol, cigarette smoking, and ovarian reserve in reproductive-age  
31  
32 African-American women. *American Journal of Obstetrics and Gynecology*, 215,  
33  
34 758.e1-758.e9. <https://doi.org/10.1016/j.ajog.2016.07.012>  
35  
36  
37 Hornstein, M. D. (2016). Lifestyle and IVF Outcomes. *Reproductive Sciences*, 23, 1626–  
38  
39 1629. <https://doi.org/10.1177/1933719116667226>  
40  
41  
42 Jensen, T. K., Hjollund, N. H. I., Henriksen, T. B., Scheike, T., Kolstad, H., Giwercman, A.,  
43  
44 ... Olsen, J. (1998). Does moderate alcohol consumption affect fertility? Follow up study  
45  
46 among couples planning first pregnancy. *BMJ*, 317, 505–510.  
47  
48 <https://doi.org/10.1136/bmj.317.7157.505>  
49  
50  
51 Kaya, Y., Kizilkaya Beji, N., Aydin, Y., & Hassa, H. (2016). The effect of health-promoting  
52  
53 lifestyle education on the treatment of unexplained female infertility. *European Journal*  
54  
55 *of Obstetrics Gynecology and Reproductive Biology*, 207, 109–114.  
56  
57 <https://doi.org/10.1016/j.ejogrb.2016.10.050>  
58  
59  
60

- 1  
2  
3 Klonoff-Cohen, H., Lam-Kruglick, P., & Gonzalez, C. (2003). Effects of maternal and  
4  
5 paternal alcohol consumption on the success rates of in vitro fertilization and gamete  
6  
7 intrafallopian transfer. *Fertility and Sterility*, *79*, 330–339.  
8  
9 [https://doi.org/10.1016/S0015-0282\(02\)04582-X](https://doi.org/10.1016/S0015-0282(02)04582-X)  
10  
11  
12 Kucuk, M., Doymaz, F., & Urman, B. (2010). Effect of energy expenditure and physical  
13  
14 activity on the outcomes of assisted reproduction treatment. *Reproductive BioMedicine*  
15  
16 *Online*, (20), 274–279. <https://doi.org/10.1016/j.rbmo.2009.11.011>  
17  
18  
19 Lintsen, A. M. E., Pasker-de Jong, P. C. M., de Boer, E. J., Burger, C. W., Jansen, C. A. M.,  
20  
21 Braat, D. D. M., ... van Dop, P. A. (2005). Effects of subfertility cause, smoking and  
22  
23 body weight on the success rate of IVF. *Human Reproduction*, *20*, 1867–1875.  
24  
25 <https://doi.org/10.1093/humrep/deh898>  
26  
27  
28 Loyen, A., Clarke-Cornwell, A. M., Anderssen, S. A., Hagströmer, M., Sardinha, L. B.,  
29  
30 Sundquist, K., ... van der Ploeg, H. P. (2017). Sedentary Time and Physical Activity  
31  
32 Surveillance Through Accelerometer Pooling in Four European Countries. *Sports*  
33  
34 *Medicine*, *47*, 1421–1435. <https://doi.org/10.1007/s40279-016-0658-y>  
35  
36  
37 Marcon, A., Pesce, G., Calciano, L., Bellisario, V., Dharmage, S. C., Garcia-Aymerich, J., ...  
38  
39 Accordini, S. (2018). Trends in smoking initiation in Europe over 40 years: A  
40  
41 retrospective cohort study. *PLoS ONE*, *13*, e0201881.  
42  
43 <https://doi.org/10.1371/journal.pone.0201881>  
44  
45  
46 Mikkelsen, E. M., Riis, A. H., Wise, L. A., Hatch, E. E., Rothman, K. J., Cueto, H. T., &  
47  
48 Sørensen, H. T. (2016). Alcohol consumption and fecundability: Prospective Danish  
49  
50 cohort study. *BMJ (Online)*, *354*, i4262. <https://doi.org/10.1136/bmj.i4262>  
51  
52  
53 Mínguez-Alarcón, L., Chavarro, J. E., & Gaskins, A. J. (2018). Caffeine, alcohol, smoking,  
54  
55 and reproductive outcomes among couples undergoing assisted reproductive technology  
56  
57 treatments. *Fertility and Sterility*, *110*, 587–592.  
58  
59  
60

1  
2  
3 <https://doi.org/10.1016/j.fertnstert.2018.05.026>

4  
5 Morris, S. N., Missmer, S. A., Cramer, D. W., Powers, R. D., McShane, P. M., & Hornstein,  
6  
7 M. D. (2006). Effects of lifetime exercise on the outcome of in vitro fertilization.

8  
9 *Obstetrics and Gynecology*, 108, 938–945.

10  
11 <https://doi.org/10.1097/01.AOG.0000235704.45652.0b>

12  
13  
14 Oboni, J. B., Marques-Vidal, P., Bastardot, F., Vollenweider, P., & Waeber, G. (2016).

15  
16 Impact of smoking on fertility and age of menopause: A population-based assessment.

17  
18 *BMJ Open*, 6, e012015. <https://doi.org/10.1136/bmjopen-2016-012015>

19  
20 Rao, M., Zeng, Z., & Tang, L. (2018). Maternal physical activity before IVF/ICSI cycles

21  
22 improves clinical pregnancy rate and live birth rate: A systematic review and meta-  
23  
24 analysis. *Reproductive Biology and Endocrinology*, 16, 11.

25  
26 <https://doi.org/10.1186/s12958-018-0328-z>

27  
28 Ricci, E., Bravi, F., Noli, S., Ferrari, S., De Cosmi, V., La Vecchia, I., ... Parazzini, F. (2019).

29  
30  
31 Mediterranean diet and the risk of poor semen quality: cross-sectional analysis of men  
32  
33 referring to an Italian Fertility Clinic. *Andrology*, 7(2).

34  
35 <https://doi.org/10.1111/andr.12587>

36  
37 Ricci, Elena, Noli, S., Cipriani, S., La Vecchia, I., Chiaffarino, F., Ferrari, S., ... Parazzini, F.

38  
39  
40 (2018). Maternal and paternal caffeine intake and art outcomes in couples referring to an  
41  
42 Italian fertility clinic: A prospective cohort. *Nutrients*, 10, 1116.

43  
44 <https://doi.org/10.3390/nu10081116>

45  
46 Rich-Edwards, J. W., Spiegelman, D., Garland, M., Hertzmark, E., Hunter, D. J., Colditz, G.

47  
48  
49 A., ... Manson, J. A. E. (2002). Physical activity, body mass index, and ovulatory  
50  
51 disorder infertility. *Epidemiology*, 13, 184–190. [https://doi.org/10.1097/00001648-](https://doi.org/10.1097/00001648-200203000-00013)

52  
53  
54  
55  
56  
57 [200203000-00013](https://doi.org/10.1097/00001648-200203000-00013)

58  
59 Rossi, B. V., Berry, K. F., Hornstein, M. D., Cramer, D. W., Ehrlich, S., & Missmer, S. A.

60



- 1  
2  
3 (2011). Effect of alcohol consumption on in vitro fertilization. *Obstetrics and*  
4  
5 *Gynecology*, 117, 136–142. <https://doi.org/10.1097/AOG.0b013e31820090e1>  
6  
7  
8 Trichopoulou, A., Costacou, T., Bamia, C., & Trichopoulos, D. (2003). Adherence to a  
9  
10 Mediterranean diet and survival in a Greek population. *The New England Journal of*  
11  
12 *Medicine*, 348, 2599–2608. <https://doi.org/10.1056/NEJMoa025039>  
13  
14  
15 Vanegas, J. C., Chavarro, J. E., Williams, P. L., Ford, J. B., Toth, T. L., Hauser, R., &  
16  
17 Gaskins, A. J. (2017). Discrete survival model analysis of a couple’s smoking pattern  
18  
19 and outcomes of assisted reproduction. *Fertility Research and Practice*, 3, 5.  
20  
21 <https://doi.org/10.1186/s40738-017-0032-2>  
22  
23  
24 Waylen, A. L., Metwally, M., Jones, G. L., Wilkinson, A. J., & Ledger, W. L. (2009). Effects  
25  
26 of cigarette smoking upon clinical outcomes of assisted reproduction: A meta-analysis.  
27  
28 *Human Reproduction Update*, 15, 31–44. <https://doi.org/10.1093/humupd/dmn046>  
29  
30  
31 Wdowiak, A., Sulima, M., Sadowska, M., Bakalczuk, G., & Bojar, I. (2014). Alcohol  
32  
33 consumption and quality of embryos obtained in programmes of in vitro fertilization.  
34  
35 *Annals of Agricultural and Environmental Medicine*, 21, 450–453.  
36  
37 <https://doi.org/10.5604/1232-1966.1108623>  
38  
39  
40 World Health Organisation (WHO). (2014). Global status report on alcohol and health.  
41  
42 [https://doi.org/entity/substance\\_abuse/publications/global\\_alcohol\\_report/en/index.html](https://doi.org/entity/substance_abuse/publications/global_alcohol_report/en/index.html)  
43  
44  
45  
46  
47  
48  
49  
50  
51  
52  
53  
54  
55  
56  
57  
58  
59  
60

**Table 1.** Demographic characteristics of 492 women, according to alcohol intake, smoking habits and leisure physical activity.

|                               | Alcohol intake (g/day) |       |                         |       |                         |       |                         |       | Smoking |       |         |       |        |       | Leisure Physical Activity |       |            |       |            |       |
|-------------------------------|------------------------|-------|-------------------------|-------|-------------------------|-------|-------------------------|-------|---------|-------|---------|-------|--------|-------|---------------------------|-------|------------|-------|------------|-------|
|                               | Abstainers             |       | 1 <sup>st</sup> tertile |       | 2 <sup>nd</sup> tertile |       | 3 <sup>rd</sup> tertile |       | Never   |       | Current |       | Former |       | < 2                       |       | 2-4        |       | ≥5         |       |
|                               | 0                      |       | 0.01-2.27               |       | 2.28-5.74               |       | ≥5.75                   |       |         |       |         |       |        |       | hours/week                |       | hours/week |       | hours/week |       |
|                               | N=140                  | 28.5% | N=117                   | 23.8% | N=122                   | 24.8% | N=113                   | 23.0% | N=272   | 55.3% | N=90    | 18.3% | N=130  | 26.4% | N=256                     | 54.1% | N=175      | 35.6% | N=51       | 10.4% |
| <b>Age (years)</b>            |                        |       |                         |       |                         |       |                         |       |         |       |         |       |        |       |                           |       |            |       |            |       |
| <35                           | 46                     | 32.9  | 38                      | 32.5  | 25                      | 20.5  | 27                      | 23.9  | 71      | 26.1  | 28      | 31.1  | 38     | 29.2  | 78                        | 29.3  | 47         | 26.9  | 11         | 21.6  |
| 35-39                         | 70                     | 50.0  | 50                      | 42.7  | 64                      | 52.5  | 59                      | 52.2  | 131     | 48.2  | 46      | 51.1  | 65     | 50.0  | 123                       | 46.2  | 89         | 50.9  | 31         | 60.8  |
| ≥40                           | 24                     | 17.1  | 29                      | 24.8  | 33                      | 27.0  | 27                      | 23.9  | 70      | 25.7  | 16      | 17.8  | 27     | 20.8  | 65                        | 24.4  | 39         | 22.3  | 9          | 17.6  |
| <b>College degree</b>         | 49                     | 35.0  | 64                      | 54.7  | 70                      | 57.4  | 72                      | 63.7  | 151     | 55.5  | 35      | 28.5  | 66     | 50.8  | 120                       | 45.1  | 110        | 62.9  | 25         | 49.0  |
| <b>Cause of infertility</b>   |                        |       |                         |       |                         |       |                         |       |         |       |         |       |        |       |                           |       |            |       |            |       |
| Male factor only              | 37                     | 26.4  | 35                      | 29.9  | 33                      | 27.0  | 23                      | 20.4  | 69      | 25.4  | 22      | 24.4  | 37     | 28.5  | 68                        | 25.6  | 47         | 26.9  | 13         | 25.5  |
| Low ovarian reserve           | 26                     | 18.6  | 25                      | 21.4  | 24                      | 19.7  | 22                      | 19.5  | 55      | 20.2  | 20      | 22.2  | 22     | 16.9  | 51                        | 19.2  | 36         | 20.6  | 10         | 19.6  |
| Endometriosis                 | 27                     | 19.3  | 21                      | 18.0  | 28                      | 23.0  | 27                      | 23.9  | 52      | 19.1  | 19      | 21.1  | 32     | 24.6  | 64                        | 24.1  | 29         | 16.6  | 10         | 19.6  |
| Ovulatory                     | 10                     | 7.1   | 5                       | 4.3   | 4                       | 3.3   | 0                       | 0     | 15      | 5.5   | 0       | 0     | 4      | 3.1   | 12                        | 4.5   | 5          | 2.9   | 2          | 3.9   |
| Tubal                         | 11                     | 7.9   | 17                      | 14.5  | 11                      | 9.0   | 15                      | 13.3  | 19      | 7.0   | 16      | 17.8  | 19     | 14.6  | 26                        | 9.8   | 21         | 12.0  | 7          | 13.7  |
| Unexplained                   | 29                     | 20.7  | 14                      | 12.0  | 22                      | 18.0  | 26                      | 23.0  | 62      | 22.8  | 13      | 14.4  | 16     | 12.3  | 45                        | 16.9  | 37         | 21.1  | 9          | 17.6  |
| <b>BMI (Kg/m<sup>2</sup>)</b> |                        |       |                         |       |                         |       |                         |       |         |       |         |       |        |       |                           |       |            |       |            |       |
| <18.5                         | 12                     | 8.6   | 11                      | 9.4   | 12                      | 9.8   | 12                      | 10.6  | 28      | 10.3  | 8       | 8.9   | 11     | 8.5   | 28                        | 10.5  | 15         | 8.6   | 4          | 7.8   |
| 18.5-24.9                     | 98                     | 70.0  | 80                      | 68.4  | 97                      | 79.5  | 94                      | 83.2  | 202     | 74.3  | 67      | 74.4  | 100    | 76.9  | 190                       | 71.4  | 137        | 78.3  | 42         | 82.4  |
| 25.0-29.9                     | 16                     | 11.4  | 15                      | 12.8  | 8                       | 6.6   | 7                       | 6.2   | 26      | 9.6   | 7       | 7.8   | 13     | 10.0  | 29                        | 10.9  | 13         | 7.4   | 4          | 7.8   |
| ≥30.0                         | 14                     | 10.0  | 11                      | 9.4   | 5                       | 4.1   | 0                       | 0     | 16      | 5.9   | 8       | 8.9   | 6      | 4.6   | 19                        | 7.1   | 10         | 5.7   | 1          | 2.0   |
| <b>Occupational PA</b>        |                        |       |                         |       |                         |       |                         |       |         |       |         |       |        |       |                           |       |            |       |            |       |

|                                            |           |             |           |             |           |             |           |             |      |       |      |       |      |       |             |              |             |              |             |              |
|--------------------------------------------|-----------|-------------|-----------|-------------|-----------|-------------|-----------|-------------|------|-------|------|-------|------|-------|-------------|--------------|-------------|--------------|-------------|--------------|
| Heavy/moderate                             | <b>50</b> | <b>35.7</b> | <b>27</b> | <b>23.3</b> | <b>33</b> | <b>27.1</b> | <b>28</b> | <b>24.8</b> | 70   | 25.7  | 26   | 28.9  | 42   | 32.3  | 83          | 31.3         | 40          | 22.9         | 15          | 30.0         |
| Mainly standing                            | <b>32</b> | <b>22.9</b> | <b>30</b> | <b>25.9</b> | <b>25</b> | <b>20.5</b> | <b>19</b> | <b>16.8</b> | 58   | 21.3  | 22   | 24.4  | 26   | 20.0  | 60          | 22.6         | 32          | 18.3         | 14          | 28.0         |
| Mainly sitting                             | <b>58</b> | <b>41.4</b> | <b>59</b> | <b>50.9</b> | <b>63</b> | <b>51.6</b> | <b>66</b> | <b>58.4</b> | 144  | 52.9  | 42   | 46.7  | 60   | 46.2  | 122         | 46.1         | 103         | 58.9         | 21          | 42.0         |
| <b>Previous ART cycle</b>                  | 84        | 60.0        | 67        | 57.3        | 69        | 56.6        | 65        | 57.5        | 165  | 60.7  | 42   | 46.7  | 78   | 60.0  | 155         | 58.3         | 98          | 56.0         | 32          | 62.8         |
| <b>Mean calories (Kcal/day), mean (SD)</b> | 1711      | (458)       | 1705      | (401)       | 1782      | (415)       | 1812      | (493)       | 1764 | (437) | 1761 | (446) | 1712 | (457) | <b>1788</b> | <b>(444)</b> | <b>1739</b> | <b>(425)</b> | <b>1597</b> | <b>(481)</b> |
| <b>Mediterranean diet Score (n=473)*</b>   |           |             |           |             |           |             |           |             |      |       |      |       |      |       |             |              |             |              |             |              |
| 0-4                                        | 51        | 38.4        | 37        | 32.5        | 33        | 28.0        | 34        | 31.5        | 75   | 28.6  | 32   | 37.2  | 25   | 20.0  | <b>79</b>   | <b>31.1</b>  | <b>41</b>   | <b>24.3</b>  | <b>12</b>   | <b>24.5</b>  |
| 5-6                                        | 53        | 39.8        | 52        | 45.6        | 53        | 44.9        | 45        | 41.7        | 113  | 43.1  | 31   | 36.1  | 56   | 44.8  | <b>110</b>  | <b>43.3</b>  | <b>73</b>   | <b>43.2</b>  | <b>16</b>   | <b>32.6</b>  |
| 7-9                                        | 29        | 21.8        | 25        | 21.9        | 32        | 27.1        | 29        | 26.8        | 74   | 28.2  | 23   | 26.7  | 44   | 35.2  | <b>65</b>   | <b>25.6</b>  | <b>55</b>   | <b>32.5</b>  | <b>21</b>   | <b>42.9</b>  |

**Bold:** p<0.05; sometimes the sums do not add up to the total because of missing values

ART: assisted reproduction technique; PA: physical activity; SD: standard deviation

\*MDS without alcohol was calculated for class of alcohol intake

**Table 2.** Relative risks for failure in clinical outcomes of ART, in 492 women according to alcohol, smoking habits and leisure physical activity.

|                         | N   | Number of high-quality oocytes (median, Q1-Q3) | Embryo transfer Failure |      | ARR (95% CI)     | Clinical pregnancy Failure |      | ARR (95% CI)     | Live birth Failure |      | ARR (95% CI)     |
|-------------------------|-----|------------------------------------------------|-------------------------|------|------------------|----------------------------|------|------------------|--------------------|------|------------------|
|                         |     |                                                | N                       | %    |                  | N                          | %    |                  | N                  | %    |                  |
| <b>Alcohol intake</b>   |     |                                                |                         |      |                  |                            |      |                  |                    |      |                  |
| Abstainers              | 140 | 5 (3-8)                                        | 16                      | 11.4 | 1                | 92                         | 65.7 | 1                | 102                | 72.9 | 1                |
| 1 <sup>st</sup> tertile | 117 | 4 (2-8)                                        | 14                      | 12.0 | 1.08 (0.55-2.12) | 72                         | 61.5 | 0.95 (0.80-1.12) | 84                 | 71.8 | 1.00 (0.89-1.13) |
| 2 <sup>nd</sup> tertile | 122 | 4 (3-7)                                        | 16                      | 13.1 | 1.02 (0.53-1.96) | 91                         | 74.6 | 1.10 (0.93-1.29) | 98                 | 80.3 | 1.07 (0.95-1.21) |
| 3 <sup>rd</sup> tertile | 113 | 5 (3-8)                                        | 19                      | 16.8 | 1.32 (0.71-2.47) | 80                         | 70.8 | 1.05 (0.89-1.23) | 87                 | 77.0 | 1.05 (0.92-1.19) |
| ≥1 drink/day            | 28  | 5 (3-8)                                        | 5                       | 17.8 | 1.34 (0.53-3.40) | 19                         | 67.9 | 1.05 (0.78-1.41) | 20                 | 71.4 | 1.01 (0.76-1.34) |
| <b>Current smoking</b>  |     |                                                |                         |      |                  |                            |      |                  |                    |      |                  |
| Never                   | 272 | 5 (3-8)                                        | 34                      | 12.5 | 1                | 187                        | 68.8 | 1                | 209                | 76.8 | 1                |
| Current                 | 91  | 5 (3-8)                                        | 13                      | 14.4 | 1.42 (0.77-2.60) | 64                         | 71.1 | 1.08 (0.91-1.28) | 68                 | 75.6 | 1.03 (0.88-1.20) |
| Former                  | 130 | 5 (3-8)                                        | 18                      | 13.8 | 1.15 (0.68-1.94) | 84                         | 64.6 | 0.98 (0.86-1.11) | 94                 | 72.3 | 0.94 (0.84-1.08) |
| Current ≤ 5 cig/day     | 42  | 5 (3-7)                                        | 8                       | 19.0 | 1.70 (0.84-3.43) | 32                         | 74.4 | 1.11 (0.88-1.41) | 34                 | 79.1 | 1.06 (0.88-1.27) |
| Current > 5 cig/day     | 48  | 4 (3-8)                                        | 5                       | 10.4 | 1.13 (0.46-2.80) | 32                         | 68.1 | 1.04 (0.84-1.29) | 34                 | 72.3 | 0.98 (0.83-1.16) |
| Current ≥20 cig/day     | 6   | 3 (2-6)*                                       | 2                       | 33.3 | 5.20 (1.40-19.2) | 5                          | 83.3 | 1.00 (0.69-1.73) | 5                  | 83.3 | 1.08 (0.65-1.79) |

1  
2  
3  
4  
5  
6  
7  
8  
9  
10  
11  
12  
13  
14  
15  
16  
17  
18  
19  
20  
21  
22  
23  
24  
25  
26  
27  
28  
29  
30  
31  
32  
33  
34  
35  
36  
37  
38  
39  
40  
41  
42  
43  
44  
45  
46

|                    |     |           |    |      |                  |     |      |                  |     |      |                  |
|--------------------|-----|-----------|----|------|------------------|-----|------|------------------|-----|------|------------------|
| Former (1-5 years) | 75  | 5 (3-9)   | 14 | 18.7 | 1.62 (0.92-2.84) | 51  | 68.0 | 1.02 (0.87-1.19) | 56  | 74.7 | 0.99 (0.87-1.12) |
| Former (>5 years)  | 55  | 5 (2-9)** | 4  | 7.3  | 0.57 (0.21-1.54) | 33  | 60.0 | 0.92 (0.76-1.12) | 38  | 69.1 | 0.94 (0.82-1.09) |
| <b>Leisure PA</b>  |     |           |    |      |                  |     |      |                  |     |      |                  |
| <2 h/wk            | 266 | 5 (3-8)   | 35 | 13.2 | 1                | 179 | 67.3 | 1                | 199 | 74.8 | 1                |
| 2-4                | 175 | 4 (3-8)   | 20 | 11.4 | 0.83 (0.48-1.43) | 113 | 64.6 | 0.99 (0.90-1.08) | 128 | 73.1 | 0.99 (0.91-1.09) |
| ≥5                 | 51  | 4 (2-8)   | 10 | 19.6 | 1.75 (0.91-3.40) | 43  | 84.3 | 1.11 (0.96-1.28) | 44  | 86.3 | 1.10 (0.95-1.28) |

ARR: adjusted relative risk; CI: confidence interval; PA: physical activity; the final model included age class, college degree, BMI class (<25.0, ≥25.0), occupational PA, previous ART cycles, calories intake. Cause for infertility for smoking habits, and MDS score for PA were also included.

\* p=0.047 as compared to never smokers

\*\* p=0.003 as compared to never smokers

## STROBE Statement—checklist of items that should be included in reports of observational studies

|                              | Item No | Recommendation                                                                                                                                                                                                                                                                                                                                                                                                                                                         |                    |
|------------------------------|---------|------------------------------------------------------------------------------------------------------------------------------------------------------------------------------------------------------------------------------------------------------------------------------------------------------------------------------------------------------------------------------------------------------------------------------------------------------------------------|--------------------|
| Title and abstract           | 1       | (a) Indicate the study's design with a commonly used term in the title or the abstract                                                                                                                                                                                                                                                                                                                                                                                 | Title and abstract |
|                              |         | (b) Provide in the abstract an informative and balanced summary of what was done and what was found                                                                                                                                                                                                                                                                                                                                                                    | p.2                |
| <b>Introduction</b>          |         |                                                                                                                                                                                                                                                                                                                                                                                                                                                                        |                    |
| Background/rationale         | 2       | Explain the scientific background and rationale for the investigation being reported                                                                                                                                                                                                                                                                                                                                                                                   | p. 4-5             |
| Objectives                   | 3       | State specific objectives, including any prespecified hypotheses                                                                                                                                                                                                                                                                                                                                                                                                       | p.5                |
| <b>Methods</b>               |         |                                                                                                                                                                                                                                                                                                                                                                                                                                                                        |                    |
| Study design                 | 4       | Present key elements of study design early in the paper                                                                                                                                                                                                                                                                                                                                                                                                                | p. 5               |
| Setting                      | 5       | Describe the setting, locations, and relevant dates, including periods of recruitment, exposure, follow-up, and data collection                                                                                                                                                                                                                                                                                                                                        | p. 5-6             |
| Participants                 | 6       | (a) <i>Cohort study</i> —Give the eligibility criteria, and the sources and methods of selection of participants. Describe methods of follow-up<br><i>Case-control study</i> —Give the eligibility criteria, and the sources and methods of case ascertainment and control selection. Give the rationale for the choice of cases and controls<br><i>Cross-sectional study</i> —Give the eligibility criteria, and the sources and methods of selection of participants | p. 6-7             |
|                              |         | (b) <i>Cohort study</i> —For matched studies, give matching criteria and number of exposed and unexposed<br><i>Case-control study</i> —For matched studies, give matching criteria and the number of controls per case                                                                                                                                                                                                                                                 | p. 6-7             |
| Variables                    | 7       | Clearly define all outcomes, exposures, predictors, potential confounders, and effect modifiers. Give diagnostic criteria, if applicable                                                                                                                                                                                                                                                                                                                               | p. 6-7             |
| Data sources/<br>measurement | 8*      | For each variable of interest, give sources of data and details of methods of assessment (measurement). Describe comparability of assessment methods if there is more than one group                                                                                                                                                                                                                                                                                   | p. 6-7             |
| Bias                         | 9       | Describe any efforts to address potential sources of bias                                                                                                                                                                                                                                                                                                                                                                                                              | p.8                |
| Study size                   | 10      | Explain how the study size was arrived at                                                                                                                                                                                                                                                                                                                                                                                                                              | p. 8               |
| Quantitative variables       | 11      | Explain how quantitative variables were handled in the analyses. If applicable, describe which groupings were chosen and why                                                                                                                                                                                                                                                                                                                                           | p.8                |
| Statistical methods          | 12      | (a) Describe all statistical methods, including those used to control for confounding                                                                                                                                                                                                                                                                                                                                                                                  | p.8                |
|                              |         | (b) Describe any methods used to examine subgroups and interactions                                                                                                                                                                                                                                                                                                                                                                                                    | p.8                |
|                              |         | (c) Explain how missing data were addressed                                                                                                                                                                                                                                                                                                                                                                                                                            | -                  |
|                              |         | (d) <i>Cohort study</i> —If applicable, explain how loss to follow-up was addressed<br><i>Case-control study</i> —If applicable, explain how matching of cases and controls was addressed<br><i>Cross-sectional study</i> —If applicable, describe analytical methods                                                                                                                                                                                                  | -                  |

1  
2  
3  
4  
5  
6  
7  
8  
9  
10  
11  
12  
13  
14  
15  
16  
17  
18  
19  
20  
21  
22  
23  
24  
25  
26  
27  
28  
29  
30  
31  
32  
33  
34  
35  
36  
37  
38  
39  
40  
41  
42  
43  
44  
45  
46  
47  
48  
49  
50  
51  
52  
53  
54  
55  
56  
57  
58  
59  
60

|  |  |                                       |                         |
|--|--|---------------------------------------|-------------------------|
|  |  | taking account of sampling strategy   |                         |
|  |  | (e) Describe any sensitivity analyses | No sensitivity analyses |

Continued on next page

For peer review only

| <b>Results</b>           |     |                                                                                                                                                                                                                      |                         |
|--------------------------|-----|----------------------------------------------------------------------------------------------------------------------------------------------------------------------------------------------------------------------|-------------------------|
| Participants             | 13* | (a) Report numbers of individuals at each stage of study—eg numbers potentially eligible, examined for eligibility, confirmed eligible, included in the study, completing follow-up, and analysed                    | p.9                     |
|                          |     | (b) Give reasons for non-participation at each stage                                                                                                                                                                 | n.a.                    |
|                          |     | (c) Consider use of a flow diagram                                                                                                                                                                                   | n.a.                    |
| Descriptive data         | 14* | (a) Give characteristics of study participants (eg demographic, clinical, social) and information on exposures and potential confounders                                                                             | p.9                     |
|                          |     | (b) Indicate number of participants with missing data for each variable of interest                                                                                                                                  | p.9                     |
|                          |     | (c) <i>Cohort study</i> —Summarise follow-up time (eg, average and total amount)<br><i>Implicit: for each women, the time between ART initiation and outcome (embryo transfer, clinical pregnancy and livebirth)</i> | -                       |
| Outcome data             | 15* | <i>Cohort study</i> —Report numbers of outcome events or summary measures over time                                                                                                                                  | p.9                     |
|                          |     | <i>Case-control study</i> —Report numbers in each exposure category, or summary measures of exposure                                                                                                                 | -                       |
|                          |     | <i>Cross-sectional study</i> —Report numbers of outcome events or summary measures                                                                                                                                   | -                       |
| Main results             | 16  | (a) Give unadjusted estimates and, if applicable, confounder-adjusted estimates and their precision (eg, 95% confidence interval). Make clear which confounders were adjusted for and why they were included         | p.9-10<br>Table 1 and 2 |
|                          |     | (b) Report category boundaries when continuous variables were categorized                                                                                                                                            | p.9-10<br>Table 1 and 2 |
|                          |     | (c) If relevant, consider translating estimates of relative risk into absolute risk for a meaningful time period                                                                                                     | -                       |
| Other analyses           | 17  | Report other analyses done—eg analyses of subgroups and interactions, and sensitivity analyses                                                                                                                       | p. 9                    |
| <b>Discussion</b>        |     |                                                                                                                                                                                                                      |                         |
| Key results              | 18  | Summarise key results with reference to study objectives                                                                                                                                                             | p.11                    |
| Limitations              | 19  | Discuss limitations of the study, taking into account sources of potential bias or imprecision. Discuss both direction and magnitude of any potential bias                                                           | p.14                    |
| Interpretation           | 20  | Give a cautious overall interpretation of results considering objectives, limitations, multiplicity of analyses, results from similar studies, and other relevant evidence                                           | p.11-13                 |
| Generalisability         | 21  | Discuss the generalisability (external validity) of the study results                                                                                                                                                | p.14                    |
| <b>Other information</b> |     |                                                                                                                                                                                                                      |                         |
| Funding                  | 22  | Give the source of funding and the role of the funders for the present study and, if applicable, for the original study on which the present article is based                                                        | p. 16                   |

\*Give information separately for cases and controls in case-control studies and, if applicable, for exposed and unexposed groups in cohort and cross-sectional studies.

**Note:** An Explanation and Elaboration article discusses each checklist item and gives methodological background and published examples of transparent reporting. The STROBE checklist is best used in conjunction with this article (freely available on the Web sites of PLoS Medicine at <http://www.plosmedicine.org/>, Annals of Internal Medicine at <http://www.annals.org/>, and Epidemiology at <http://www.epidem.com/>). Information on the STROBE Initiative is available at [www.strobe-statement.org](http://www.strobe-statement.org).



# BMJ Open

## Pre-treatment maternal lifestyle and outcomes of assisted reproduction: an Italian cohort study.

|                                 |                                                                                                                                                                                                                                                                                                                                                                                                                                                                                                                                                                                                                                                                                                                                                                                                                                                                                                                                                                                                                                                                                                                                                               |
|---------------------------------|---------------------------------------------------------------------------------------------------------------------------------------------------------------------------------------------------------------------------------------------------------------------------------------------------------------------------------------------------------------------------------------------------------------------------------------------------------------------------------------------------------------------------------------------------------------------------------------------------------------------------------------------------------------------------------------------------------------------------------------------------------------------------------------------------------------------------------------------------------------------------------------------------------------------------------------------------------------------------------------------------------------------------------------------------------------------------------------------------------------------------------------------------------------|
| Journal:                        | <i>BMJ Open</i>                                                                                                                                                                                                                                                                                                                                                                                                                                                                                                                                                                                                                                                                                                                                                                                                                                                                                                                                                                                                                                                                                                                                               |
| Manuscript ID                   | bmjopen-2020-038837.R1                                                                                                                                                                                                                                                                                                                                                                                                                                                                                                                                                                                                                                                                                                                                                                                                                                                                                                                                                                                                                                                                                                                                        |
| Article Type:                   | Original research                                                                                                                                                                                                                                                                                                                                                                                                                                                                                                                                                                                                                                                                                                                                                                                                                                                                                                                                                                                                                                                                                                                                             |
| Date Submitted by the Author:   | 05-Oct-2020                                                                                                                                                                                                                                                                                                                                                                                                                                                                                                                                                                                                                                                                                                                                                                                                                                                                                                                                                                                                                                                                                                                                                   |
| Complete List of Authors:       | Ricci, Elena; Ospedale Maggiore Policlinico, Dipartimento della Donna, del Neonato e del Bambino, Noli, Stefania; Università degli Studi di Milano, Department of Clinical Sciences and Community Health, . Ferrari, Stefania; Fondazione Ca' Granda Ospedale Maggiore policlinico, Infertility Unit<br>La Vecchia, Irene; Università degli Studi di Milano, Department of Clinical Sciences and Community Health, .<br>De Cosmi, Valentina; La Fondazione IRCCS Ospedale Maggiore Policlinico, Pediatric Intermediate Care Unit<br>Castiglioni, Marta; Università degli Studi di Milano, Department of Clinical Sciences and Community Health, .<br>Somigliana, Edgardo; Ospedale Maggiore Policlinico, Dipartimento della Donna, del Neonato e del Bambino,; Università degli Studi di Milano, Department of Clinical Sciences and Community Health, .<br>Agostoni, Carlo; University of Milan, Department of Pediatrics, Fondazione IRCCS Ca' Granda-Ospedale Maggiore Policlinico<br>Cipriani, Sonia<br>Mauri, Paola; Università degli Studi di Milano, Department of Clinical Sciences and Community Health, .<br>Parazzini, Fabio; University of Milan, |
| <b>Primary Subject Heading</b>: | Obstetrics and gynaecology                                                                                                                                                                                                                                                                                                                                                                                                                                                                                                                                                                                                                                                                                                                                                                                                                                                                                                                                                                                                                                                                                                                                    |
| Secondary Subject Heading:      | Smoking and tobacco, Sports and exercise medicine                                                                                                                                                                                                                                                                                                                                                                                                                                                                                                                                                                                                                                                                                                                                                                                                                                                                                                                                                                                                                                                                                                             |
| Keywords:                       | Reproductive medicine < GYNAECOLOGY, Subfertility < GYNAECOLOGY, EPIDEMIOLOGY                                                                                                                                                                                                                                                                                                                                                                                                                                                                                                                                                                                                                                                                                                                                                                                                                                                                                                                                                                                                                                                                                 |
|                                 |                                                                                                                                                                                                                                                                                                                                                                                                                                                                                                                                                                                                                                                                                                                                                                                                                                                                                                                                                                                                                                                                                                                                                               |

SCHOLARONE™  
Manuscripts



I, the Submitting Author has the right to grant and does grant on behalf of all authors of the Work (as defined in the below author licence), an exclusive licence and/or a non-exclusive licence for contributions from authors who are: i) UK Crown employees; ii) where BMJ has agreed a CC-BY licence shall apply, and/or iii) in accordance with the terms applicable for US Federal Government officers or employees acting as part of their official duties; on a worldwide, perpetual, irrevocable, royalty-free basis to BMJ Publishing Group Ltd ("BMJ") its licensees and where the relevant Journal is co-owned by BMJ to the co-owners of the Journal, to publish the Work in this journal and any other BMJ products and to exploit all rights, as set out in our [licence](#).

The Submitting Author accepts and understands that any supply made under these terms is made by BMJ to the Submitting Author unless you are acting as an employee on behalf of your employer or a postgraduate student of an affiliated institution which is paying any applicable article publishing charge ("APC") for Open Access articles. Where the Submitting Author wishes to make the Work available on an Open Access basis (and intends to pay the relevant APC), the terms of reuse of such Open Access shall be governed by a Creative Commons licence – details of these licences and which [Creative Commons](#) licence will apply to this Work are set out in our licence referred to above.

Other than as permitted in any relevant BMJ Author's Self Archiving Policies, I confirm this Work has not been accepted for publication elsewhere, is not being considered for publication elsewhere and does not duplicate material already published. I confirm all authors consent to publication of this Work and authorise the granting of this licence.

1  
2  
3 **Pre-treatment maternal lifestyle and outcomes of assisted reproduction: an Italian**  
4  
5 **cohort study.**  
6

7 Elena Ricci,<sup>1</sup> Stefania Noli,<sup>2</sup> Stefania Ferrari,<sup>2</sup> Irene La Vecchia,<sup>2</sup> Valentina De Cosmi,<sup>3</sup> Marta  
8 Castiglioni,<sup>2</sup> Edgardo Somigliana,<sup>1,2</sup> Carlo Agostoni,<sup>4</sup> Sonia Cipriani,<sup>1</sup> Paola Agnese Mauri,<sup>2</sup>  
9  
10 Fabio Parazzini,<sup>1,2</sup>  
11  
12

13  
14 1 Department of Woman, Newborn and Child, Fondazione Istituto di Ricovero e Cura a Carattere Scientifico  
15 (IRCCS) Ca' Granda Ospedale Maggiore Policlinico, Milan, Italy.  
16

17  
18 2 Department of Clinical Sciences and Community Health, Università degli Studi di Milano, Milan, Italy.  
19

20 3 Pediatric Intermediate Care Unit, Fondazione IRCCS Ospedale Ca' Granda-Ospedale Maggiore Policlinico;  
21 Department of Clinical Sciences and Community Health, University of Milan, Branch of Medical Statistics,  
22 Biometry, and Epidemiology "G. A. Maccacaro", Milan, Italy  
23  
24

25  
26 4 Pediatric Intermediate Care Unit, Fondazione IRCCS Ospedale Ca' Granda-Ospedale Maggiore Policlinico,  
27 and Department of Clinical Sciences and Community Health, University of Milan, Milan, Italy.  
28  
29

30  
31  
32 **Corresponding author:**  
33

34 Elena Ricci,  
35

36 Department of Woman, Newborn and Child,  
37

38 Fondazione Istituto di Ricovero e Cura a Carattere Scientifico (IRCCS) Ca' Granda Ospedale  
39 Maggiore Policlinico  
40  
41

42 Via Commenda, 12 - 20122 Milan, Italy  
43

44 Tel: +39.02.5503; fax: +39.02.5503; e-mail: [ed.ricci@libero.it](mailto:ed.ricci@libero.it)  
45  
46

47  
48 **Short title:** Maternal lifestyle and ART outcomes  
49

50 **Word count:** 3223  
51  
52  
53  
54  
55  
56  
57  
58  
59  
60

## Abstract

**Objective.** We investigated whether lifestyle affects assisted reproduction technique (ART) outcomes.

**Design.** Prospective cohort study.

**Setting.** Italian Fertility Unit.

**Participants.** From September 2014 to December 2016, women from couples presenting for evaluation and eligible for ART were invited to participate. Information on alcohol intake, current smoking and leisure physical activity during the year before the interview was collected, using a structured questionnaire. We considered the ART outcomes of the cycle immediately following the interview.

**Primary and secondary outcome measures.** The primary outcome measure was clinical pregnancy. Secondary measures were number of retrieved oocytes, embryo transfer and live birth.

**Results.** In 492 women undergoing an ART cycle, 427 (86.8%) underwent embryo transfer, 157 (31.9%) had clinical pregnancy, 121 (24.6%) had live birth. In women in the 3<sup>rd</sup> tertile of alcohol intake, adjusted relative risk (ARR) was 1.32 (95% confidence interval (CI) 0.71-2.47), 1.05 (95% CI 0.89-1.23) and 1.05 (95% CI 0.92-1.19) for implantation, clinical pregnancy and live birth failure respectively. The corresponding figures in women currently smoking more than 5 cigarettes/day were 1.13 (95% CI 0.46-2.80), 1.04 (95% CI 0.84-1.29), and 0.98 (95% CI 0.83-1.16), and in women with physical activity  $\geq 5$  hours/week were 1.75 (95% CI 0.91-3.40), 1.11 (95% CI 0.96-1.28), and 1.10 (95% CI 0.95-1.28) respectively.

**Conclusion.** Conservatively, all women seeking pregnancy should be advised to limit alcohol drinking and smoking. Moreover, our study suggested that maintaining a moderate level of physical activity could be beneficial.

1  
2  
3 **Keywords.** Alcohol intake, smoking habits, leisure physical activity, assisted reproduction  
4 techniques, pregnancy, live birth.  
5  
6

7  
8 **Strengths and limitations of this study**  
9

- 10
- 11 • This study analysed several lifestyle factors of women interviewed in the same  
12 institution, participation was practically complete, and information on nutritional  
13 status was also available.  
14
  - 15 • Smoking and drinking habits were self-reported by women, so some underestimates  
16 could have occurred.  
17
  - 18 • Smoking and drinking aside, this study offer information about physical activity in the  
19 period preceding assisted reproduction, a factor still under discussion.  
20  
21  
22  
23  
24  
25  
26  
27  
28  
29  
30  
31  
32  
33  
34  
35  
36  
37  
38  
39  
40  
41  
42  
43  
44  
45  
46  
47  
48  
49  
50  
51  
52  
53  
54  
55  
56  
57  
58  
59  
60

## Introduction

Alcohol consumption and smoking are among the most common lifestyle exposures in women. During the last decades, the relationship between these lifestyle factors and spontaneous fertility has been investigated in several observational studies: some have shown that alcohol and smoking affect spontaneous fertility [1,2], although not consistently [3,4].

These exposures may contribute to spontaneous reproductive failures, but they may also impair the success rate of assisted reproduction technology (ART). Thus, it is conceivable that modifying such lifestyle habits before treatments could reduce the need for ART procedures and/or enhance the likelihood of in vitro fertilization (IVF) success. In a study conducted in California, alcohol intake was negatively associated with the number of oocytes retrieved, but not with live birth rate [5]. Otherwise, in a prospective cohort study, no association emerged between alcohol intake during days 4–10 of ovarian stimulation and IVF outcomes [6]. A recent systematic revision of literature confirmed that average alcohol intake before ART initiation did not impact on the outcomes, whereas intake at the start of ART cycle had a negative effect on fertilization, embryo quality and implantation [7].

Cigarette smoking is the most common lifestyle factor that could affect IVF outcomes and several studies have demonstrated the negative effect of smoking on pregnancy rate and upon clinical outcome of ART [8]. However, literature on this issue is still limited [9], although a recent meta-analysis [10] found that current smokers undergoing ART had lower clinical pregnancy and live birth rate than non-smokers and experienced a significant increase of spontaneous miscarriage.

Evidence on physical activity (PA) was inconsistent: although data from the Nurses' Health Study II suggested that vigorous activity may reduce ovulatory infertility [11], a Norwegian cohort indicated that high intensity and frequency of PA increase sub-fertility [12]. Studies specifically on PA and ART success were equally inconsistent: investigating pre-treatment

1  
2  
3 PA, Morris et al. [13] found that women undergoing ART had a 40% reduced likelihood of  
4 live birth, if engaged in PA 4 hours or more per week for less than 10 years, compared with  
5 women not regularly engaged in PA. Another study [14] did not find a beneficial effect of  
6 activity levels before treatment on clinical outcomes, although moderate PA during ART  
7 cycle was associated with higher implantation and live birth rates. Recently, it was suggested  
8 that health-promoting lifestyle education may increase the success rates of ART, correcting  
9 risk factors that negatively affect fertility [15]. This evidence has been recently reviewed:  
10 pooled estimates from a systematic research found that physical activity before ART cycles  
11 was associated with increased rates of clinical pregnancy and live births, but no effect was  
12 shown on miscarriage rate [16].

13  
14 These factors have been analysed in relation to sperm quality. Several reviews showed that  
15 the same lifestyle habits, such as smoking and regular drinking, negatively impacting female  
16 fertility, also have a detrimental effect on semen quality [17,18]. On the contrary, the effect of  
17 physical activity is still under discussion [19,20].

18  
19 Alcohol consumption [21], smoking habits [22] and physical activity [23,24] largely vary in  
20 different populations. Thus, it is interesting to analyse the role of these lifestyles on fertility  
21 treatment in an Italian setting, using data from a prospective cohort study conducted in an  
22 Italian Fertility Centre.

## 23 24 25 26 27 28 29 30 31 32 33 34 35 36 37 38 39 40 41 42 43 44 45 46 47 **Methods**

48 From September 2014 to December 2016, in randomly selected days, sub-fertile couples,  
49 presenting for evaluation to the Fertility Unit of Fondazione IRCCS Ca' Granda, Ospedale  
50 Maggiore, Policlinico, Milan, and eligible for ART, were invited to participate into a  
51 prospective cohort study on the role of lifestyle habits and diet on ART outcomes. The study  
52  
53  
54  
55  
56  
57  
58  
59  
60

1  
2  
3 protocol was approved by the Institutional Ethical Review Board. All procedures were in  
4  
5 accord with the Helsinki Declaration and all participants provided written informed consent.  
6  
7

8  
9 Study participation was proposed during the diagnostic phase. Couples were interviewed on  
10  
11 the day of oocyte retrieval. The time interval between the proposal of the study and the  
12  
13 interview was generally less than one month.  
14  
15

16  
17 The overall participation rate was close to 95%, mainly since couples were interviewed during  
18  
19 the period spent waiting for the different diagnostic stages, before actual ART procedures,  
20  
21 and the not sensitive character of questions.  
22  
23

24  
25 Both partners of couples who agreed to participate were interviewed by centrally trained  
26  
27 personnel, using a standard questionnaire to obtain information on general socio-demographic  
28  
29 characteristics, anthropometric variables, personal medical history and reproductive history,  
30  
31 and lifestyle factors. Couples that cannot speak Italian were excluded from the study.  
32  
33

#### 34 *Patient and public involvement.*

35  
36

37 Patients were not involved in the design, recruitment or conduct of the study.  
38  
39

40 The present study reported on the outcome of the cycle immediately following the interview.  
41  
42

#### 43 *Procedures*

44  
45

46  
47 To evaluate the effect of recent exposure, patients were asked to report about their usual  
48  
49 weekly food consumption in the last year, using a reproducible and valid food frequency  
50  
51 questionnaire [25–27], including the weekly numbers of drinks for several alcoholic  
52  
53 beverages. The questionnaire was satisfactorily reproducible [28]. Taking into account the  
54  
55 different ethanol concentration, one unit corresponded to approximately 125 ml of wine,  
56  
57 330 ml of beer and 30 ml of hard liquor (i.e., about 12.5 g of ethanol). Total alcohol intake,  
58  
59  
60



1  
2  
3 expressed in grams of ethanol per day (g/day), was computed as the sum of all reported  
4 alcoholic beverages. “Never drinkers” and “Ex- drinkers” were patients who abstained from  
5 drinking lifelong and for at least 12 months at the time of interview, respectively. For the  
6 purpose of this study, we considered these two groups of women in the same category  
7 “Abstainers”.

8  
9  
10  
11  
12  
13  
14  
15 A woman was considered a smoker if she had smoked  $\geq$  one cigarette/day for at least one  
16 year; a former smoker if she had smoked  $\geq$  one cigarette/day for at least one year, but had  
17 stopped more than one year before the interview, and a non-smoker if she had never smoked  $\geq$   
18 one cigarette/day.

19  
20  
21  
22  
23  
24  
25 Before starting ovarian stimulation, women were advised to abstain from alcohol and  
26 smoking, thus no such exposure should occur during ART cycle.

27  
28  
29  
30  
31 The adherence to the Mediterranean diet was assessed through an a priori score  
32 (Mediterranean diet score, MDS), developed by Trichopoulou and colleagues [29] and  
33 calculated as previously published [30]. To include MDS score in the analysis of alcohol  
34 intake, it was recalculated excluding alcohol. Satisfactory reproducibility of questions on self-  
35 reported smoking and drinking habits in our study populations has been previously reported  
36 [31].

37  
38  
39  
40  
41  
42  
43  
44  
45  
46  
47  
48  
49  
50  
51  
52  
53  
54  
55  
56  
57  
58  
59  
60  
61  
62  
63  
64  
65  
66  
67  
68  
69  
70  
71  
72  
73  
74  
75  
76  
77  
78  
79  
80  
81  
82  
83  
84  
85  
86  
87  
88  
89  
90  
91  
92  
93  
94  
95  
96  
97  
98  
99  
100  
101  
102  
103  
104  
105  
106  
107  
108  
109  
110  
111  
112  
113  
114  
115  
116  
117  
118  
119  
120  
121  
122  
123  
124  
125  
126  
127  
128  
129  
130  
131  
132  
133  
134  
135  
136  
137  
138  
139  
140  
141  
142  
143  
144  
145  
146  
147  
148  
149  
150  
151  
152  
153  
154  
155  
156  
157  
158  
159  
160  
161  
162  
163  
164  
165  
166  
167  
168  
169  
170  
171  
172  
173  
174  
175  
176  
177  
178  
179  
180  
181  
182  
183  
184  
185  
186  
187  
188  
189  
190  
191  
192  
193  
194  
195  
196  
197  
198  
199  
200  
201  
202  
203  
204  
205  
206  
207  
208  
209  
210  
211  
212  
213  
214  
215  
216  
217  
218  
219  
220  
221  
222  
223  
224  
225  
226  
227  
228  
229  
230  
231  
232  
233  
234  
235  
236  
237  
238  
239  
240  
241  
242  
243  
244  
245  
246  
247  
248  
249  
250  
251  
252  
253  
254  
255  
256  
257  
258  
259  
260  
261  
262  
263  
264  
265  
266  
267  
268  
269  
270  
271  
272  
273  
274  
275  
276  
277  
278  
279  
280  
281  
282  
283  
284  
285  
286  
287  
288  
289  
290  
291  
292  
293  
294  
295  
296  
297  
298  
299  
300  
301  
302  
303  
304  
305  
306  
307  
308  
309  
310  
311  
312  
313  
314  
315  
316  
317  
318  
319  
320  
321  
322  
323  
324  
325  
326  
327  
328  
329  
330  
331  
332  
333  
334  
335  
336  
337  
338  
339  
340  
341  
342  
343  
344  
345  
346  
347  
348  
349  
350  
351  
352  
353  
354  
355  
356  
357  
358  
359  
360  
361  
362  
363  
364  
365  
366  
367  
368  
369  
370  
371  
372  
373  
374  
375  
376  
377  
378  
379  
380  
381  
382  
383  
384  
385  
386  
387  
388  
389  
390  
391  
392  
393  
394  
395  
396  
397  
398  
399  
400  
401  
402  
403  
404  
405  
406  
407  
408  
409  
410  
411  
412  
413  
414  
415  
416  
417  
418  
419  
420  
421  
422  
423  
424  
425  
426  
427  
428  
429  
430  
431  
432  
433  
434  
435  
436  
437  
438  
439  
440  
441  
442  
443  
444  
445  
446  
447  
448  
449  
450  
451  
452  
453  
454  
455  
456  
457  
458  
459  
460  
461  
462  
463  
464  
465  
466  
467  
468  
469  
470  
471  
472  
473  
474  
475  
476  
477  
478  
479  
480  
481  
482  
483  
484  
485  
486  
487  
488  
489  
490  
491  
492  
493  
494  
495  
496  
497  
498  
499  
500  
501  
502  
503  
504  
505  
506  
507  
508  
509  
510  
511  
512  
513  
514  
515  
516  
517  
518  
519  
520  
521  
522  
523  
524  
525  
526  
527  
528  
529  
530  
531  
532  
533  
534  
535  
536  
537  
538  
539  
540  
541  
542  
543  
544  
545  
546  
547  
548  
549  
550  
551  
552  
553  
554  
555  
556  
557  
558  
559  
560  
561  
562  
563  
564  
565  
566  
567  
568  
569  
570  
571  
572  
573  
574  
575  
576  
577  
578  
579  
580  
581  
582  
583  
584  
585  
586  
587  
588  
589  
590  
591  
592  
593  
594  
595  
596  
597  
598  
599  
600  
601  
602  
603  
604  
605  
606  
607  
608  
609  
610  
611  
612  
613  
614  
615  
616  
617  
618  
619  
620  
621  
622  
623  
624  
625  
626  
627  
628  
629  
630  
631  
632  
633  
634  
635  
636  
637  
638  
639  
640  
641  
642  
643  
644  
645  
646  
647  
648  
649  
650  
651  
652  
653  
654  
655  
656  
657  
658  
659  
660  
661  
662  
663  
664  
665  
666  
667  
668  
669  
670  
671  
672  
673  
674  
675  
676  
677  
678  
679  
680  
681  
682  
683  
684  
685  
686  
687  
688  
689  
690  
691  
692  
693  
694  
695  
696  
697  
698  
699  
700  
701  
702  
703  
704  
705  
706  
707  
708  
709  
710  
711  
712  
713  
714  
715  
716  
717  
718  
719  
720  
721  
722  
723  
724  
725  
726  
727  
728  
729  
730  
731  
732  
733  
734  
735  
736  
737  
738  
739  
740  
741  
742  
743  
744  
745  
746  
747  
748  
749  
750  
751  
752  
753  
754  
755  
756  
757  
758  
759  
760  
761  
762  
763  
764  
765  
766  
767  
768  
769  
770  
771  
772  
773  
774  
775  
776  
777  
778  
779  
780  
781  
782  
783  
784  
785  
786  
787  
788  
789  
790  
791  
792  
793  
794  
795  
796  
797  
798  
799  
800  
801  
802  
803  
804  
805  
806  
807  
808  
809  
810  
811  
812  
813  
814  
815  
816  
817  
818  
819  
820  
821  
822  
823  
824  
825  
826  
827  
828  
829  
830  
831  
832  
833  
834  
835  
836  
837  
838  
839  
840  
841  
842  
843  
844  
845  
846  
847  
848  
849  
850  
851  
852  
853  
854  
855  
856  
857  
858  
859  
860  
861  
862  
863  
864  
865  
866  
867  
868  
869  
870  
871  
872  
873  
874  
875  
876  
877  
878  
879  
880  
881  
882  
883  
884  
885  
886  
887  
888  
889  
890  
891  
892  
893  
894  
895  
896  
897  
898  
899  
900  
901  
902  
903  
904  
905  
906  
907  
908  
909  
910  
911  
912  
913  
914  
915  
916  
917  
918  
919  
920  
921  
922  
923  
924  
925  
926  
927  
928  
929  
930  
931  
932  
933  
934  
935  
936  
937  
938  
939  
940  
941  
942  
943  
944  
945  
946  
947  
948  
949  
950  
951  
952  
953  
954  
955  
956  
957  
958  
959  
960  
961  
962  
963  
964  
965  
966  
967  
968  
969  
970  
971  
972  
973  
974  
975  
976  
977  
978  
979  
980  
981  
982  
983  
984  
985  
986  
987  
988  
989  
990  
991  
992  
993  
994  
995  
996  
997  
998  
999  
1000

Leisure PA was defined as the number of hours per week of a sport or activity such as walking, gardening, cycling, etc., in the year preceding the interview. Scores ranged between 1 and 4, corresponding to  $<2$ , 2–4, 5–7 and  $>7$  h of PA per week. No information was available on intensity of activity.

Patients were managed according to a standardized clinical protocol as reported in details elsewhere [32,33]. The choice between conventional IVF or Intra-Cytoplasmic Sperm Injection (ICSI) was made based on semen characteristics. Good quality oocytes were those in

1  
2  
3 metaphase I-II for IVF and metaphase II for ICSI. In this analysis, we considered as outcome  
4 the cumulative pregnancy rate per retrieval in the cycle immediately following the interview.  
5  
6 For example, if a woman did not achieve a pregnancy with a fresh embryo transfer, but  
7  
8 subsequently a frozen embryo from the same cycle led to a clinical pregnancy, we considered  
9  
10 the clinical pregnancy as the outcome.  
11  
12

13  
14 All clinical information (including infertility diagnosis) was collected from medical records.  
15

### 16 ***Statistical analysis***

17  
18 Clinical pregnancy was considered the main objective of the study. Considering a 30% of  
19  
20 pregnancy rate per cycle, as usual in our Fertility Centre, this study was powered to detect a  
21  
22 1.5 increase of risk in the highest tertile of intake as compared to the lowest ( $\alpha=0.05$ ,  $\beta=0.80$ ).  
23  
24 Multiple outcomes were considered: 1. Number of retrieved good quality oocytes; 2. Embryo  
25  
26 transfer; 3. Clinical pregnancy; 4: Live birth. Patients who failed each treatment stage were  
27  
28 included in the following stage as failures.  
29  
30

31  
32 Categorical variables were described as frequency (N) and percentage (%) and compared  
33  
34 using the Pearson or Mantel-Haenzsel chi-square, as appropriate. Continuous variables were  
35  
36 described as mean and standard deviation (SD) if normally distributed, or median and  
37  
38 interquartile range (IQR) if not normally distributed and analysed using analysis of variance  
39  
40 and Kruskal-Wallis test respectively. Correlations were evaluated using Pearson  $r$  or  
41  
42 Spearman rho coefficients, as appropriate.  
43  
44

45  
46 We used multivariable generalized linear mixed models to evaluate the association of  
47  
48 exposure variables with treatment outcomes. We used a Poisson distribution and log link  
49  
50 function for the number of good quality oocytes retrieved, and binomial distribution and logit  
51  
52 link function for clinical outcomes. We estimated relative risks (RRs) of each clinical  
53  
54 outcome and corresponding 95% CIs in categories of alcohol intake (approximate tertiles),  
55  
56  
57  
58  
59  
60

1  
2  
3 former and current smoking (no,  $\leq 5$ ,  $>5$  cigarettes/day) and leisure PA ( $<2$ , 2-4,  $\geq 5$   
4 hours/week) in the year before the interview.  
5  
6

7 To account for potential confounders, we included terms for variables, that were associated  
8 with these modifiable lifestyles, and/or with at least one ART outcome, in the general linear  
9 model and multiple log-binomial regression models (as indicated in table footnotes). Terms  
10 for interaction were tested.  
11  
12  
13  
14  
15

16 All the analyses were performed using the SAS software, version 9.4 (SAS Institute, Inc.,  
17 Cary, NC, USA).  
18  
19  
20  
21  
22

## 23 **Results**

24 From September 2014 to December 2016, out of 501 women undergoing ART cycle, 9  
25 (1.8%) did not provide complete information about their lifestyle, or were lost to follow-up,  
26 and were excluded from this analysis. Analysis was then performed on 492 ART cycle  
27 outcomes from 492 women.  
28  
29  
30  
31  
32  
33

34 Mean age was 36.6 years (standard deviation, SD, 3.6 range 27-45) and mean body mass  
35 index (BMI) was 22.3 kg/m<sup>2</sup> (SD 3.9, range 16.4-41.7). Thirty women (6.1%) were obese  
36 (BMI  $\geq 30.0$  kg/m<sup>2</sup>).  
37  
38  
39  
40  
41

42 The characteristics of women according to alcohol, smoking habits and PA are shown in  
43 Table 1.  
44  
45

46 Only 16 women (3.2%) exercised more than 7 hours per week, so we merged the two  
47 categories 5-7 and  $>7$  hours/week. Leisure PA was associated with college degree and higher  
48 MDS, and inversely with daily calories intake.  
49  
50  
51

52 Of the 492 initiated cycles in each woman, 427 (86.8%) resulted in embryo transfer, 157  
53 (31.9%) in clinical pregnancy, 121 (24.6%) in live births. Out of 36 clinical pregnancies not  
54  
55  
56  
57  
58  
59  
60

1  
2  
3 resulting in live birth, 34 ended with miscarriage, one with an induced abortion, and one was  
4  
5 extra-uterine.  
6

7  
8 Age was the main risk factor for ART failure. The median of good quality oocytes was 6  
9  
10 (IQR 4-9) in women <35 years old, 5 (IQR 3-8) in 35-39, 3 (IQR 2-6) in women aged  $\geq 40$   
11  
12 years ( $p < 0.0001$ ). No association was observed at univariate analysis with alcohol intake,  
13  
14 current smoking or leisure PA. As compared to women aged < 35, RR for missed embryo  
15  
16 transfer was 2.01 (95% CI 1.03-3.93) for women aged 35-39 and 2.29 (95% CI 1.11-4.72) for  
17  
18 those aged  $\geq 40$  years. The corresponding figures were 1.16 (95% CI 0.98-1.37) and 1.40  
19  
20 (95% CI 1.18-1.66) for clinical pregnancy failure; 1.19 (95% CI 1.03-1.37) and 1.37 (95% CI  
21  
22 1.19-1.78) for live birth failure.  
23  
24

25  
26 At univariate analysis, leisure PA  $\geq 5$  hours/week was significantly associated with higher  
27  
28 risk of not achieving clinical pregnancy (RR 1.25, 95% CI 1.08-1.45), whereas no relationship  
29  
30 was observed with embryo transfer and live birth. Alcohol intake and current smoking were  
31  
32 not significantly associated with any ART outcomes.  
33  
34

35  
36 Table 2 shows the relation between exposures and clinical results, accounting for potential  
37  
38 confounders. No significant association was observed between smoking, alcohol intake and  
39  
40 leisure PA, thus they were not mutually adjusted. Terms for interaction between smoking,  
41  
42 alcohol intake and leisure PA did not show any significance and were excluded from the final  
43  
44 models.  
45

46  
47 In this sample, 28 (5.7%) women drank at least 1 alcohol unit per day. Although the ARR for  
48  
49 embryo transfer failure was higher, it was not significant as compared to abstainers, and no  
50  
51 effect was observed on other outcomes. ARR for embryo transfer failure was significantly  
52  
53 higher in six women who smoked  $\geq 20$  cigarettes/day during the year before ART procedure.  
54  
55 Former smokers who stopped smoking more than 5 years before undergoing ART had a  
56  
57 higher number of oocytes than never smokers.  
58  
59  
60

Analysing alcohol intake (g) and number of cigarettes as continuous variables, we did not find any significant correlation with number of high-quality oocytes. Since most women did not smoke, median intakes were 0 (IQR 0-0) in all categories and no differences could be observed. As regards alcohol, women who underwent embryo transfer had median intakes lower than those who did not (1.9 (IQR 0-5.3) vs. 2.7 (IQR 0-7.5 g/day),  $p=0.16$ ); those who achieved clinical pregnancy consumed 1.8 (IQR 0-4.7) g/day and those who did not achieve it consumed 2.4 (IQR 0-5.6) g/day ( $p=0.11$ ). Women with livebirth had lower alcohol intake than those without livebirth (1.8 (IQR 0-5.3) vs 2.3 (IQR 0-5.6) g/day,  $p=0.20$ ). None of these differences was statistically significant.

Considering ICSI and IVF separately, ART outcomes were similar, and including this variable in the equations did not affect the risk estimation.

Finally, we controlled these results for partner's characteristics and lifestyle, in a subgroup of 324 couples with complete information for both male and female. Men's age was significantly associated with higher rate of negative outcomes in the univariate analysis, but when including women's age in the model this relationship lost significance. As regards to women lifestyle, results did not change. Men's lifestyle (smoking, alcohol drinking and physical activity) did not significantly impact on ART outcomes.

## Discussion

In this sample of women referring to an Italian Fertility centre, lifestyle habits did not play a significant role in the outcome of ART, except for heavy smoking, that was associated with fewer good quality oocytes and higher rate of missed embryo transfer.

### *Alcohol*

The role of alcohol intake on spontaneous fertility has been associated with decreased fertility and chance of conception [4,34,35]. A recent meta-analysis of observational studies,

1  
2  
3 including about 100,000 women, suggested that alcohol consumption was associated with  
4 reduced fecundability [36]. In biological terms, alcohol may lower fertility affecting  
5 endogenous hormone levels [37] and embryo quality [38].  
6  
7  
8

9  
10 The role of alcohol intake on ART success rate has been analysed in some studies showing  
11 inconsistent results [5,6,39,40]. These differences may be partially due to the high  
12 heterogeneity between studies, in particular in terms of intake prevalence. For example, in  
13 Boston, US, a study, found that 30% of women reporting >1 unit/day of alcohol intake had an  
14 increased risk of adverse outcome, but no association between low to moderate alcohol  
15 consumption was observed [39]. Literature suggests that alcohol drinking at start of ART may  
16 exert a detrimental effect, but the evidence is still limited [7].  
17  
18  
19  
20  
21  
22  
23  
24

25  
26 Along this line, we did not find any association between alcohol intake and ART outcomes,  
27 but we were not able to analyse the effect of high alcohol intake, present in only 5.7% of our  
28 sample.  
29  
30  
31

### 32 ***Smoking***

33 Since it appears to have a detrimental effect on spontaneous fertility [1,41], it has been  
34 suggested that cigarette smoking may affect IVF outcomes as well.  
35  
36  
37  
38

39 However, individual studies available on this issue do not always support a significant  
40 association between smoking and IVF success or oocyte quality. For example, in a study  
41 conducted in Australia in women undergoing IVF [6], the mean number of oocytes did not  
42 significantly differ between regular smokers (11.1, SD 6.5), ex-smokers (11.8, SD 10.1) or  
43 non-smokers (11.2, SD 7.6), indicating that smoking might not influence oocytes production.  
44 Interestingly, the same analysis showed that fertilization rates were not influenced by current  
45 smoking status but decreased as years of smoking increased ( $p < 0.001$ ).  
46  
47  
48  
49  
50  
51  
52  
53  
54

55 In a large Dutch nationwide retrospective analysis conducted on 8457 patients [42], no  
56 significant difference was observed in the mean number of oocytes retrieved between non-  
57  
58  
59  
60

1  
2  
3 smokers and smokers, yet there were significantly lower clinical pregnancy and live birth  
4 rates for smoking patients.  
5

6  
7 These findings regarding clinical pregnancies and live birth rate were further confirmed by  
8 more recent meta-analysis and reviews [8,9]. As regards to former smokers, they tend to have  
9 better ART outcomes than current smokers [7], but the evidence is scanty about the influence  
10 of smoking cessation on ART outcomes.  
11  
12

13  
14  
15  
16 Vanegas et al. suggested that male smoking could also be associated with ART outcomes  
17 [43]. Whereas male current smoking did not affect the different stages of ART (egg retrieval,  
18 fertilization, embryo transfer, implantation, clinical pregnancy and livebirth), among past  
19 smokers every additional year since a man had quit smoking reduced the risk of failing ART  
20 by 4%, particularly between clinical pregnancy and live birth.  
21  
22

23  
24  
25  
26  
27  
28 In our sample, good quality oocytes number was significantly lower in women who had  
29 smoked 20 or more cigarettes per day in the year before ART procedure, as compared to  
30 never smokers as well as to women currently smoking 5 or less cigarettes/day, and risk of  
31 embryo transfer failure was significantly higher than in never smokers. No significant effect  
32 was observed on clinical pregnancy and live birth. However, only six women had such a high  
33 level of smoking, thus our estimates should be considered with caution. Male smoking did not  
34 appear as a contributing factor to ART failure.  
35  
36  
37  
38  
39  
40  
41  
42  
43  
44  
45  
46

### 47 ***Leisure Physical Activity***

48  
49 Findings from literature are inconsistent. Among 2,232 patients prospectively enrolled before  
50 their first IVF cycle, Morris et al. [13] found that women who exercised 4 or more hours per  
51 week, for 1-9 years before ART cycle, were more likely to experience an implantation failure  
52 (OR 2.0, 95% CI 1.4-3.1) or pregnancy loss (OR 2.0, CI 1.2-3.4) than women who did not  
53 report exercise.  
54  
55  
56  
57  
58  
59  
60

1  
2  
3 On the contrary, in a group of 131 women [14] those who were physically more active during  
4 the ART procedure were more likely to have an increased implantation rate and a live birth;  
5 none of these women met the criteria for high PA, so that the comparison was done between  
6 low and moderate PA. On the same line, an observational study [44] found that a self-reported  
7 active lifestyle in the preceding year affected favourably the ART outcome in 121 women,  
8 with clinical pregnancy more likely in women with a level above median for each kind of  
9 activity: active living (OR 1.96, 95% CI 1.09-3.50), sports/exercise (OR 1.48, 95% CI 1.02–  
10 2.15), and total activity (OR 1.52, 95% CI 1.15–2.01). Recently, findings from the EARTH  
11 Study [45] suggested that time spent in moderate-to-vigorous physical activities before IVF  
12 was not associated with probability of implantation, clinical pregnancy or live birth, in 273  
13 women who underwent 427 IVF cycles. Pooled estimates from a recent meta-analysis [16]  
14 suggested a beneficial effect of PA on ART outcomes, and no effect on spontaneous abortion;  
15 despite this, study results are widely heterogeneous.

16  
17 In our sample, an increased risk of embryo transfer failure was suggested in women with  $\geq 5$   
18 hours/week of leisure PA, but this result was not significant in the multivariable analysis.

### 19 ***Strengths and Limitations.***

20  
21 Potential limitations should be considered. All information on smoking and drinking was self-  
22 reported by women, so some underestimates could have occurred. However, in Italy, alcohol  
23 consumption is socially accepted and recommendations to avoid alcohol to protect fertility  
24 have not received widespread attention and are not routinely advocated by gynaecologists  
25 before IVF.

26  
27 Other sources of bias, including selection or confounding factors, are also unlikely to have  
28 produced marked effects, especially considering that all women were interviewed in the same  
29 institution and that participation was practically complete. Moreover, we analysed  
30  
31  
32  
33  
34  
35  
36  
37  
38  
39  
40  
41  
42  
43  
44  
45  
46  
47  
48  
49  
50  
51  
52  
53  
54  
55  
56  
57  
58  
59  
60



1  
2  
3 information on nutritional status, and their inclusion into the model did not change the  
4  
5 estimated RRs.  
6

7  
8 A further limitation was that knowledge regarding type of physical exercise was limited,  
9  
10 because we recorded total number of weekly hours spent exercising, but not intensity or type  
11  
12 of exercise.  
13

14  
15 Comparing the clinical pregnancy percentage in women who did not drink at all and those in  
16  
17 the 3<sup>rd</sup> tertile of intake, the power of detecting a significant difference was about 13%. Using  
18  
19 our data, with 30% prevalence of abstainers, we could identify a RR of not achieving clinical  
20  
21 pregnancy of 1.8 for drinkers.  
22

23  
24 Lastly, this study only included women presenting for ART, thus the findings are not  
25  
26 generalizable to the wider population.  
27

## 28 **Conclusions**

29  
30 Our study did not show an effect of alcohol consumption, current smoking and leisure  
31  
32 physical activity on number of good quality oocytes and success rate after ART procedures.  
33

34  
35 Considering that reassuring results of our study were related to moderate alcohol intake and  
36  
37 cigarette smoking, conservatively, all women seeking pregnancy should be advised to limit or  
38  
39 avoid alcohol drinking and, of course, smoking. Moderate physical activity as a part of a  
40  
41 healthy lifestyle is also advisable, although current knowledge does not support convincing  
42  
43 evidence of a direct beneficial effect.  
44  
45  
46  
47  
48  
49  
50  
51  
52  
53  
54  
55  
56  
57  
58  
59  
60

**Declarations****Ethics approval and consent to participate.**

The study protocol was approved by the Ethical Review Board of Fondazione IRCCS Ca' Granda Ospedale Maggiore Policlinico, Milano Area B (reference number 2616, 1421/2014).

All patients included gave their written informed consent to participate in the study.

**Availability of data and materials.**

The dataset analysed during the current study is available from the corresponding author on reasonable request.

**Competing interests.**

The authors declare that they do not have any competing interests.

**Funding**

No funding was obtained for this study.

**Data sharing.**

Data are available upon reasonable request addressed to the corresponding author.

**Authors' contribution**

FP and ILV designed the research study; MC, ES, PAM and SN contributed to data acquisition and interpretation; ER, SC and VDC analysed the data; SF, ES, CA and FP interpreted the information and wrote the paper.

**Acknowledgements**

We are indebted with Marco Reschini, Benedetta Gallotti e Maria Cavadini for their valuable contribution to data collection and patients' counselling, and with Francesca Bravi for her support to data analysis.

## References

- [1] Hassan MAM, Killick SR. Negative lifestyle is associated with a significant reduction in fecundity. *Fertil Steril* 2004;81:384–92. <https://doi.org/10.1016/j.fertnstert.2003.06.027>.
- [2] Oboni JB, Marques-Vidal P, Bastardot F, Vollenweider P, Waeber G. Impact of smoking on fertility and age of menopause: A population-based assessment. *BMJ Open* 2016;6:e012015. <https://doi.org/10.1136/bmjopen-2016-012015>.
- [3] Hawkins Bressler L, Bernardi LA, De Chavez PJD, Baird DD, Carnethon MR, Marsh EE. Alcohol, cigarette smoking, and ovarian reserve in reproductive-age African-American women. *Am J Obstet Gynecol* 2016;215:758.e1-758.e9. <https://doi.org/10.1016/j.ajog.2016.07.012>.
- [4] Mikkelsen EM, Riis AH, Wise LA, Hatch EE, Rothman KJ, Cueto HT, et al. Alcohol consumption and fecundability: Prospective Danish cohort study. *BMJ* 2016;354:i4262. <https://doi.org/10.1136/bmj.i4262>.
- [5] Klonoff-Cohen H, Lam-Kruglick P, Gonzalez C. Effects of maternal and paternal alcohol consumption on the success rates of in vitro fertilization and gamete intrafallopian transfer. *Fertil Steril* 2003;79:330–9. [https://doi.org/10.1016/S0015-0282\(02\)04582-X](https://doi.org/10.1016/S0015-0282(02)04582-X).
- [6] Firms S, Cruzat VF, Keane KN, Joesbury KA, Lee AH, Newsholme P, et al. The effect of cigarette smoking, alcohol consumption and fruit and vegetable consumption on IVF outcomes: A review and presentation of original data. *Reprod Biol Endocrinol* 2015;13. <https://doi.org/10.1186/s12958-015-0133-x>.
- [7] Mínguez-Alarcón L, Chavarro JE, Gaskins AJ. Caffeine, alcohol, smoking, and reproductive outcomes among couples undergoing assisted reproductive technology treatments. *Fertil Steril* 2018;110:587–92.

- 1  
2  
3 <https://doi.org/10.1016/j.fertnstert.2018.05.026>.
- 4  
5 [8] Waylen AL, Metwally M, Jones GL, Wilkinson AJ, Ledger WL. Effects of cigarette  
6 smoking upon clinical outcomes of assisted reproduction: A meta-analysis. *Hum*  
7 *Reprod Update* 2009;15:31–44. <https://doi.org/10.1093/humupd/dmn046>.
- 8  
9  
10  
11  
12 [9] Hornstein MD. Lifestyle and IVF Outcomes. *Reprod Sci* 2016;23:1626–9.  
13 <https://doi.org/10.1177/1933719116667226>.
- 14  
15  
16  
17 [10] Budani M, Fensore S, Di Marzio. M, Tiboni G. Cigarette smoking impairs clinical  
18 outcomes of assisted reproductive technologies: A meta-analysis of the literature.  
19 *Reprod Toxicol* 2018;80:49–59.
- 20  
21  
22  
23 [11] Rich-Edwards JW, Spiegelman D, Garland M, Hertzmark E, Hunter DJ, Colditz GA, et  
24 al. Physical activity, body mass index, and ovulatory disorder infertility. *Epidemiology*  
25 2002;13:184–90. <https://doi.org/10.1097/00001648-200203000-00013>.
- 26  
27  
28  
29  
30 [12] Gudmundsdottir SL, Flanders WD, Augestad LB. Physical activity and fertility in  
31 women: The North-Trøndelag Health Study. *Hum Reprod* 2009;24:3196–3204.  
32 <https://doi.org/10.1093/humrep/dep337>.
- 33  
34  
35  
36  
37 [13] Morris SN, Missmer SA, Cramer DW, Powers RD, McShane PM, Hornstein MD.  
38 Effects of lifetime exercise on the outcome of in vitro fertilization. *Obstet Gynecol*  
39 2006;108:938–945. <https://doi.org/10.1097/01.AOG.0000235704.45652.0b>.
- 40  
41  
42  
43  
44 [14] Kucuk M, Doymaz F, Urman B. Effect of energy expenditure and physical activity on  
45 the outcomes of assisted reproduction treatment. *Reprod Biomed Online* 2010:274–9.  
46 <https://doi.org/10.1016/j.rbmo.2009.11.011>.
- 47  
48  
49  
50  
51 [15] Kaya Y, Kizilkaya Beji N, Aydin Y, Hassa H. The effect of health-promoting lifestyle  
52 education on the treatment of unexplained female infertility. *Eur J Obstet Gynecol*  
53 *Reprod Biol* 2016;207:109–14. <https://doi.org/10.1016/j.ejogrb.2016.10.050>.
- 54  
55  
56  
57  
58 [16] Rao M, Zeng Z, Tang L. Maternal physical activity before IVF/ICSI cycles improves  
59  
60

- 1  
2  
3 clinical pregnancy rate and live birth rate: A systematic review and meta-analysis.  
4  
5  
6 *Reprod Biol Endocrinol* 2018;16:11. <https://doi.org/10.1186/s12958-018-0328-z>.
- 7  
8 [17] Ricci E, Al Beitawi S, Cipriani S, Candiani M, Chiaffarino F, Viganò P, et al. Semen  
9  
10 quality and alcohol intake: a systematic review and meta-analysis. *Reprod Biomed*  
11  
12 *Online* 2017;34:38–47. <https://doi.org/10.1016/j.rbmo.2016.09.012>.
- 13  
14 [18] Sharma R, Harlev A, Agarwal A, Esteves SC. Cigarette Smoking and Semen Quality:  
15  
16 A New Meta-analysis Examining the Effect of the 2010 World Health Organization  
17  
18 Laboratory Methods for the Examination of Human Semen. *Eur Urol* 2016.  
19  
20 <https://doi.org/10.1016/j.eururo.2016.04.010>.
- 21  
22 [19] Mínguez-Alarcón L, Chavarro JE, Mendiola J, Gaskins AJ, Torres-Cantero AM.  
23  
24 Physical activity is not related to semen quality in young healthy men. *Fertil Steril*  
25  
26 2014;102:1103–9. <https://doi.org/10.1016/j.fertnstert.2014.06.032>.
- 27  
28 [20] Vaamonde D, Da Silva-Grigoletto ME, García-Manso JM, Barrera N, Vaamonde-  
29  
30 Lemos R. Physically active men show better semen parameters and hormone values  
31  
32 than sedentary men. *Eur J Appl Physiol* 2012;112:3267–73.  
33  
34 <https://doi.org/10.1007/s00421-011-2304-6>.
- 35  
36 [21] World Health Organisation (WHO). Global status report on alcohol and health. World  
37  
38 Heal Organ 2014.  
39  
40 [https://doi.org/entity/substance\\_abuse/publications/global\\_alcohol\\_report/en/index.ht](https://doi.org/entity/substance_abuse/publications/global_alcohol_report/en/index.html)  
41  
42 ml.
- 43  
44 [22] Marcon A, Pesce G, Calciano L, Bellisario V, Dharmage SC, Garcia-Aymerich J, et al.  
45  
46 Trends in smoking initiation in Europe over 40 years: A retrospective cohort study.  
47  
48 *PLoS One* 2018;13:e0201881. <https://doi.org/10.1371/journal.pone.0201881>.
- 49  
50 [23] Loyen A, Clarke-Cornwell AM, Anderssen SA, Hagströmer M, Sardinha LB,  
51  
52 Sundquist K, et al. Sedentary Time and Physical Activity Surveillance Through  
53  
54  
55  
56  
57  
58  
59  
60

- 1  
2  
3 Accelerometer Pooling in Four European Countries. *Sport Med* 2017;47:1421–35.  
4  
5 <https://doi.org/10.1007/s40279-016-0658-y>.  
6  
7  
8 [24] Gomes M, Figueiredo D, Teixeira L, Poveda V, Paúl C, Santos-Silva A, et al. Physical  
9  
10 inactivity among older adults across Europe based on the SHARE database. *Age*  
11  
12 *Ageing* 2017;46:71–7. <https://doi.org/10.1093/ageing/afw165>.  
13  
14 [25] Decarli A, Franceschi S, Ferraroni M, Gnagnarella P, Parpinel MT, La Vecchia C, et  
15  
16 al. Validation of a food-frequency questionnaire to assess dietary intakes in cancer  
17  
18 studies in Italy: Results for specific nutrients. *Ann Epidemiol* 1996;6:110–8.  
19  
20 [https://doi.org/10.1016/1047-2797\(95\)00129-8](https://doi.org/10.1016/1047-2797(95)00129-8).  
21  
22  
23 [26] Franceschi S, Negri E, Salvini S, Decarli A, Ferraroni M, Filiberti R, et al.  
24  
25  
26 Reproducibility of an Italian food frequency questionnaire for cancer studies: Results  
27  
28 for specific food items. *Eur J Cancer* 1993;29:2298–305. [https://doi.org/10.1016/0959-](https://doi.org/10.1016/0959-8049(93)90225-5)  
29  
30 [8049\(93\)90225-5](https://doi.org/10.1016/0959-8049(93)90225-5).  
31  
32  
33 [27] Franceschi S, Barbone F, Negri E, Decarli A, Ferraroni M, Filiberti R, et al.  
34  
35  
36 Reproducibility of an Italian food frequency questionnaire for cancer studies. Results  
37  
38 for specific nutrients. *Ann Epidemiol* 1995;5:69–75. [https://doi.org/10.1016/1047-](https://doi.org/10.1016/1047-2797(95)92893-D)  
39  
40 [2797\(95\)92893-D](https://doi.org/10.1016/1047-2797(95)92893-D).  
41  
42  
43 [28] D'Avanzo B, La Vecchia C, Katsouyanni K, Negri E, Trichopoulos D. Reliability of  
44  
45 information on cigarette smoking and beverage consumption provided by hospital  
46  
47 controls. *Epidemiology* 1996;7:312–5. <https://doi.org/10.2307/3702870>.  
48  
49 [29] Trichopoulou A, Costacou T, Bamia C, Trichopoulos D. Adherence to a Mediterranean  
50  
51 diet and survival in a Greek population. *N Engl J Med* 2003;348:2599–608.  
52  
53 <https://doi.org/10.1056/NEJMoa025039>.  
54  
55  
56 [30] Ricci E, Bravi F, Noli S, Ferrari S, De Cosmi V, La Vecchia I, et al. Mediterranean diet  
57  
58 and the risk of poor semen quality: cross-sectional analysis of men referring to an  
59  
60

- 1  
2  
3 Italian Fertility Clinic. *Andrology* 2019;7:156–62. <https://doi.org/10.1111/andr.12587>.
- 4  
5 [31] Ferraroni M, Decarli A, Franceschi S, La Vecchia C, Enard L, Negri E, et al. Validity  
6 and reproducibility of alcohol consumption in Italy. *Int J Epidemiol* 1996;25:775–82.  
7  
8 <https://doi.org/10.1093/ije/25.4.775>.
- 9  
10  
11 [32] Benaglia L, Bermejo A, Somigliana E, Faulisi S, Ragni G, Fedele L, et al. In vitro  
12 fertilization outcome in women with unoperated bilateral endometriomas. *Fertil Steril*  
13 2013;99:1714–9. <https://doi.org/10.1016/j.fertnstert.2013.01.110>.
- 14  
15 [33] Ricci E, Noli S, Cipriani S, La Vecchia I, Chiaffarino F, Ferrari S, et al. Maternal and  
16 paternal caffeine intake and art outcomes in couples referring to an Italian fertility  
17 clinic: A prospective cohort. *Nutrients* 2018;10:1116.  
18  
19 <https://doi.org/10.3390/nu10081116>.
- 20  
21 [34] Eggert J, Theobald H, Engfeldt P. Effects of alcohol consumption on female fertility  
22 during an 18-year period. *Fertil Steril* 2004;81:379–83.  
23  
24 <https://doi.org/10.1016/j.fertnstert.2003.06.018>.
- 25  
26 [35] Jensen TK, Hjollund NHI, Henriksen TB, Scheike T, Kolstad H, Giwercman A, et al.  
27 Does moderate alcohol consumption affect fertility? Follow up study among couples  
28 planning first pregnancy. *BMJ* 1998;317:505–10.  
29  
30 <https://doi.org/10.1136/bmj.317.7157.505>.
- 31  
32 [36] Fan D, Liu L, Xia Q, Wang W, Wu S, Tian G, et al. Female alcohol consumption and  
33 fecundability: A systematic review and dose-response meta-analysis. *Sci Rep*  
34 2017;7:13815. <https://doi.org/10.1038/s41598-017-14261-8>.
- 35  
36 [37] Rossi B V., Berry KF, Hornstein MD, Cramer DW, Ehrlich S, Missmer SA. Effect of  
37 alcohol consumption on in vitro fertilization. *Obstet Gynecol* 2011;117:136–42.  
38  
39 <https://doi.org/10.1097/AOG.0b013e31820090e1>.
- 40  
41 [38] Wdowiak A, Sulima M, Sadowska M, Bakalczuk G, Bojar I. Alcohol consumption and  
42  
43  
44  
45  
46  
47  
48  
49  
50  
51  
52  
53  
54  
55  
56  
57  
58  
59  
60

- 1  
2  
3 quality of embryos obtained in programmes of in vitro fertilization. *Ann Agric Environ*  
4  
5 *Med* 2014;21:450–3. <https://doi.org/10.5604/1232-1966.1108623>.
- 6  
7 [39] Abadia L, Chiu YH, Williams PL, Toth TL, Souter I, Hauser R, et al. The association  
8  
9 between pretreatment maternal alcohol and caffeine intake and outcomes of assisted  
10  
11 reproduction in a prospectively followed cohort. *Hum Reprod* 2017;32:1846–1854,.  
12  
13 <https://doi.org/10.1093/humrep/dex237>.
- 14  
15 [40] Gormack AA, Peek JC, Derraik JGB, Gluckman PD, Young NL, Cutfield WS. Many  
16  
17 women undergoing fertility treatment make poor lifestyle choices that may affect  
18  
19 treatment outcome. *Hum Reprod* 2015;30:1617–24.  
20  
21 <https://doi.org/10.1093/humrep/dev094>.
- 22  
23 [41] Dechanet C, Anahory T, Mathieu Daude JC, Quantin X, Reyftmann L, Hamamah S, et  
24  
25 al. Effects of cigarette smoking on reproduction. *Hum Reprod Update* 2011;17:79–95.  
26  
27 <https://doi.org/10.1093/humupd/dmq033>.
- 28  
29 [42] Lintsen AME, Pasker-de Jong PCM, de Boer EJ, Burger CW, Jansen CAM, Braat  
30  
31 DDM, et al. Effects of subfertility cause, smoking and body weight on the success rate  
32  
33 of IVF. *Hum Reprod* 2005;20:1867–75. <https://doi.org/10.1093/humrep/deh898>.
- 34  
35 [43] Vanegas JC, Chavarro JE, Williams PL, Ford JB, Toth TL, Hauser R, et al. Discrete  
36  
37 survival model analysis of a couple's smoking pattern and outcomes of assisted  
38  
39 reproduction. *Fertil Res Pract* 2017;3:5. <https://doi.org/10.1186/s40738-017-0032-2>.
- 40  
41 [44] Evenson KR, Calhoun KC, Herring AH, Pritchard D, Wen F, Steiner AZ. Association  
42  
43 of physical activity in the past year and immediately after in vitro fertilization on  
44  
45 pregnancy. *Fertil Steril* 2014;101:1047–54.  
46  
47 <https://doi.org/10.1016/j.fertnstert.2013.12.041>.
- 48  
49 [45] Gaskins AJ, Mendiola J, Afeiche M, Jørgensen N, Swan SH, Chavarro JE. Physical  
50  
51 activity and television watching in relation to semen quality in young men. *Br J Sports*  
52  
53  
54  
55  
56  
57  
58  
59  
60



1  
2  
3 Med 2015;49:265–70. <https://doi.org/10.1136/bjsports-2012-091644>.  
4  
5  
6  
7  
8  
9  
10  
11  
12  
13  
14  
15  
16  
17  
18  
19  
20  
21  
22  
23  
24  
25  
26  
27  
28  
29  
30  
31  
32  
33  
34  
35  
36  
37  
38  
39  
40  
41  
42  
43  
44  
45  
46  
47  
48  
49  
50  
51  
52  
53  
54  
55  
56  
57  
58  
59  
60

For peer review only

Table 1. Demographic characteristics of 492 women, according to alcohol intake, smoking habits and leisure physical activity.

|                               | Alcohol intake (g/day) |       |                         |       |                         |       |                         |       | Smoking |       |         |       |        |       | Leisure Physical Activity |       |            |       |            |       |
|-------------------------------|------------------------|-------|-------------------------|-------|-------------------------|-------|-------------------------|-------|---------|-------|---------|-------|--------|-------|---------------------------|-------|------------|-------|------------|-------|
|                               | Abstainers             |       | 1 <sup>st</sup> tertile |       | 2 <sup>nd</sup> tertile |       | 3 <sup>rd</sup> tertile |       | Never   |       | Current |       | Former |       | < 2                       |       | 2-4        |       | ≥5         |       |
|                               | 0                      |       | 0.01-2.27               |       | 2.28-5.74               |       | ≥5.75                   |       |         |       |         |       |        |       | hours/week                |       | hours/week |       | hours/week |       |
|                               | N=140                  | 28.5% | N=117                   | 23.8% | N=122                   | 24.8% | N=113                   | 23.0% | N=272   | 55.3% | N=90    | 18.3% | N=130  | 26.4% | N=256                     | 54.1% | N=175      | 35.6% | N=51       | 10.4% |
| <b>Age (years)</b>            |                        |       |                         |       |                         |       |                         |       |         |       |         |       |        |       |                           |       |            |       |            |       |
| <35                           | 46                     | 32.9  | 38                      | 32.5  | 25                      | 20.5  | 27                      | 23.9  | 71      | 26.1  | 28      | 31.1  | 38     | 29.2  | 78                        | 29.3  | 47         | 26.9  | 11         | 21.6  |
| 35-39                         | 70                     | 50.0  | 50                      | 42.7  | 64                      | 52.5  | 59                      | 52.2  | 131     | 48.2  | 46      | 51.1  | 65     | 50.0  | 123                       | 46.2  | 89         | 50.9  | 31         | 60.8  |
| ≥40                           | 24                     | 17.1  | 29                      | 24.8  | 33                      | 27.0  | 27                      | 23.9  | 70      | 25.7  | 16      | 17.8  | 27     | 20.8  | 65                        | 24.4  | 39         | 22.3  | 9          | 17.6  |
| <b>College degree</b>         | 49                     | 35.0  | 64                      | 54.7  | 70                      | 57.4  | 72                      | 63.7  | 151     | 55.5  | 35      | 28.5  | 66     | 50.8  | 120                       | 45.1  | 110        | 62.9  | 25         | 49.0  |
| <b>Cause of infertility</b>   |                        |       |                         |       |                         |       |                         |       |         |       |         |       |        |       |                           |       |            |       |            |       |
| Male factor only              | 37                     | 26.4  | 35                      | 29.9  | 33                      | 27.0  | 23                      | 20.4  | 69      | 25.4  | 22      | 24.4  | 37     | 28.5  | 68                        | 25.6  | 47         | 26.9  | 13         | 25.5  |
| Low ovarian reserve           | 26                     | 18.6  | 25                      | 21.4  | 24                      | 19.7  | 22                      | 19.5  | 55      | 20.2  | 20      | 22.2  | 22     | 16.9  | 51                        | 19.2  | 36         | 20.6  | 10         | 19.6  |
| Endometriosis                 | 27                     | 19.3  | 21                      | 18.0  | 28                      | 23.0  | 27                      | 23.9  | 52      | 19.1  | 19      | 21.1  | 32     | 24.6  | 64                        | 24.1  | 29         | 16.6  | 10         | 19.6  |
| Ovulatory                     | 10                     | 7.1   | 5                       | 4.3   | 4                       | 3.3   | 0                       | 0     | 15      | 5.5   | 0       | 0     | 4      | 3.1   | 12                        | 4.5   | 5          | 2.9   | 2          | 3.9   |
| Tubal                         | 11                     | 7.9   | 17                      | 14.5  | 11                      | 9.0   | 15                      | 13.3  | 19      | 7.0   | 16      | 17.8  | 19     | 14.6  | 26                        | 9.8   | 21         | 12.0  | 7          | 13.7  |
| Unexplained                   | 29                     | 20.7  | 14                      | 12.0  | 22                      | 18.0  | 26                      | 23.0  | 62      | 22.8  | 13      | 14.4  | 16     | 12.3  | 45                        | 16.9  | 37         | 21.1  | 9          | 17.6  |
| <b>BMI (Kg/m<sup>2</sup>)</b> |                        |       |                         |       |                         |       |                         |       |         |       |         |       |        |       |                           |       |            |       |            |       |
| <18.5                         | 12                     | 8.6   | 11                      | 9.4   | 12                      | 9.8   | 12                      | 10.6  | 28      | 10.3  | 8       | 8.9   | 11     | 8.5   | 28                        | 10.5  | 15         | 8.6   | 4          | 7.8   |
| 18.5-24.9                     | 98                     | 70.0  | 80                      | 68.4  | 97                      | 79.5  | 94                      | 83.2  | 202     | 74.3  | 67      | 74.4  | 100    | 76.9  | 190                       | 71.4  | 137        | 78.3  | 42         | 82.4  |
| 25.0-29.9                     | 16                     | 11.4  | 15                      | 12.8  | 8                       | 6.6   | 7                       | 6.2   | 26      | 9.6   | 7       | 7.8   | 13     | 10.0  | 29                        | 10.9  | 13         | 7.4   | 4          | 7.8   |
| ≥30.0                         | 14                     | 10.0  | 11                      | 9.4   | 5                       | 4.1   | 0                       | 0     | 16      | 5.9   | 8       | 8.9   | 6      | 4.6   | 19                        | 7.1   | 10         | 5.7   | 1          | 2.0   |
| <b>Occupational PA</b>        |                        |       |                         |       |                         |       |                         |       |         |       |         |       |        |       |                           |       |            |       |            |       |

|                                                    |           |             |           |             |           |             |           |             |      |       |      |       |      |       |             |              |             |              |             |              |
|----------------------------------------------------|-----------|-------------|-----------|-------------|-----------|-------------|-----------|-------------|------|-------|------|-------|------|-------|-------------|--------------|-------------|--------------|-------------|--------------|
| Heavy/moderate                                     | <b>50</b> | <b>35.7</b> | <b>27</b> | <b>23.3</b> | <b>33</b> | <b>27.1</b> | <b>28</b> | <b>24.8</b> | 70   | 25.7  | 26   | 28.9  | 42   | 32.3  | 83          | 31.3         | 40          | 22.9         | 15          | 30.0         |
| Mainly standing                                    | <b>32</b> | <b>22.9</b> | <b>30</b> | <b>25.9</b> | <b>25</b> | <b>20.5</b> | <b>19</b> | <b>16.8</b> | 58   | 21.3  | 22   | 24.4  | 26   | 20.0  | 60          | 22.6         | 32          | 18.3         | 14          | 28.0         |
| Mainly sitting                                     | <b>58</b> | <b>41.4</b> | <b>59</b> | <b>50.9</b> | <b>63</b> | <b>51.6</b> | <b>66</b> | <b>58.4</b> | 144  | 52.9  | 42   | 46.7  | 60   | 46.2  | 122         | 46.1         | 103         | 58.9         | 21          | 42.0         |
| <b>Previous ART cycle</b>                          | 84        | 60.0        | 67        | 57.3        | 69        | 56.6        | 65        | 57.5        | 165  | 60.7  | 42   | 46.7  | 78   | 60.0  | 155         | 58.3         | 98          | 56.0         | 32          | 62.8         |
| <b>Mean calories<br/>(Kcal/day), mean<br/>(SD)</b> | 1711      | (458)       | 1705      | (401)       | 1782      | (415)       | 1812      | (493)       | 1764 | (437) | 1761 | (446) | 1712 | (457) | <b>1788</b> | <b>(444)</b> | <b>1739</b> | <b>(425)</b> | <b>1597</b> | <b>(481)</b> |
| <b>Mediterranean diet<br/>Score (n=473)*</b>       |           |             |           |             |           |             |           |             |      |       |      |       |      |       |             |              |             |              |             |              |
| 0-4                                                | 51        | 38.4        | 37        | 32.5        | 33        | 28.0        | 34        | 31.5        | 75   | 28.6  | 32   | 37.2  | 25   | 20.0  | <b>79</b>   | <b>31.1</b>  | <b>41</b>   | <b>24.3</b>  | <b>12</b>   | <b>24.5</b>  |
| 5-6                                                | 53        | 39.8        | 52        | 45.6        | 53        | 44.9        | 45        | 41.7        | 113  | 43.1  | 31   | 36.1  | 56   | 44.8  | <b>110</b>  | <b>43.3</b>  | <b>73</b>   | <b>43.2</b>  | <b>16</b>   | <b>32.6</b>  |
| 7-9                                                | 29        | 21.8        | 25        | 21.9        | 32        | 27.1        | 29        | 26.8        | 74   | 28.2  | 23   | 26.7  | 44   | 35.2  | <b>65</b>   | <b>25.6</b>  | <b>55</b>   | <b>32.5</b>  | <b>21</b>   | <b>42.9</b>  |

**Bold:**  $p < 0.05$ ; sometimes the sums do not add up to the total because of missing values

ART: assisted reproduction technique; PA: physical activity; SD: standard deviation

\*MDS without alcohol was calculated for class of alcohol intake

**Table 2.** Relative risks for failure in clinical outcomes of ART, in 492 women according to alcohol, smoking habits and leisure physical activity.

|                         | N   | Number of high-quality oocytes (median, Q1-Q3) | Missed Embryo transfer |      | ARR (95% CI)     | Clinical pregnancy Failure |      | ARR (95% CI)     | Live birth Failure |      | ARR (95% CI)     |
|-------------------------|-----|------------------------------------------------|------------------------|------|------------------|----------------------------|------|------------------|--------------------|------|------------------|
|                         |     |                                                | N                      | %    |                  | N                          | %    |                  | N                  | %    |                  |
| <b>Alcohol intake</b>   |     |                                                |                        |      |                  |                            |      |                  |                    |      |                  |
| Abstainers              | 140 | 5 (3-8)                                        | 16                     | 11.4 | 1                | 92                         | 65.7 | 1                | 102                | 72.9 | 1                |
| 1 <sup>st</sup> tertile | 117 | 4 (2-8)                                        | 14                     | 12.0 | 1.08 (0.55-2.12) | 72                         | 61.5 | 0.95 (0.80-1.12) | 84                 | 71.8 | 1.00 (0.89-1.13) |
| 2 <sup>nd</sup> tertile | 122 | 4 (3-7)                                        | 16                     | 13.1 | 1.02 (0.53-1.96) | 91                         | 74.6 | 1.10 (0.93-1.29) | 98                 | 80.3 | 1.07 (0.95-1.21) |
| 3 <sup>rd</sup> tertile | 113 | 5 (3-8)                                        | 19                     | 16.8 | 1.32 (0.71-2.47) | 80                         | 70.8 | 1.05 (0.89-1.23) | 87                 | 77.0 | 1.05 (0.92-1.19) |
| ≥1 drink/day            | 28  | 5 (3-8)                                        | 5                      | 17.8 | 1.34 (0.53-3.40) | 19                         | 67.9 | 1.05 (0.78-1.41) | 20                 | 71.4 | 1.01 (0.76-1.34) |
| <b>Current smoking</b>  |     |                                                |                        |      |                  |                            |      |                  |                    |      |                  |
| Never                   | 272 | 5 (3-8)                                        | 34                     | 12.5 | 1                | 187                        | 68.8 | 1                | 209                | 76.8 | 1                |
| Current                 | 91  | 5 (3-8)                                        | 13                     | 14.4 | 1.42 (0.77-2.60) | 64                         | 71.1 | 1.08 (0.91-1.28) | 68                 | 75.6 | 1.03 (0.88-1.20) |
| Former                  | 130 | 5 (3-8)                                        | 18                     | 13.8 | 1.15 (0.68-1.94) | 84                         | 64.6 | 0.98 (0.86-1.11) | 94                 | 72.3 | 0.94 (0.84-1.08) |
| Current ≤ 5 cig/day     | 42  | 5 (3-7)                                        | 8                      | 19.0 | 1.70 (0.84-3.43) | 32                         | 74.4 | 1.11 (0.88-1.41) | 34                 | 79.1 | 1.06 (0.88-1.27) |
| Current > 5 cig/day     | 48  | 4 (3-8)                                        | 5                      | 10.4 | 1.13 (0.46-2.80) | 32                         | 68.1 | 1.04 (0.84-1.29) | 34                 | 72.3 | 0.98 (0.83-1.16) |
| Current ≥20 cig/day     | 6   | 3 (2-6)*                                       | 2                      | 33.3 | 5.20 (1.40-19.2) | 5                          | 83.3 | 1.00 (0.69-1.73) | 5                  | 83.3 | 1.08 (0.65-1.79) |

|                    |     |           |    |      |                  |     |      |                  |     |      |                  |
|--------------------|-----|-----------|----|------|------------------|-----|------|------------------|-----|------|------------------|
| Former (1-5 years) | 75  | 5 (3-9)   | 14 | 18.7 | 1.62 (0.92-2.84) | 51  | 68.0 | 1.02 (0.87-1.19) | 56  | 74.7 | 0.99 (0.87-1.12) |
| Former (>5 years)  | 55  | 5 (2-9)** | 4  | 7.3  | 0.57 (0.21-1.54) | 33  | 60.0 | 0.92 (0.76-1.12) | 38  | 69.1 | 0.94 (0.82-1.09) |
| <b>Leisure PA</b>  |     |           |    |      |                  |     |      |                  |     |      |                  |
| <2 h/wk            | 266 | 5 (3-8)   | 35 | 13.2 | 1                | 179 | 67.3 | 1                | 199 | 74.8 | 1                |
| 2-4                | 175 | 4 (3-8)   | 20 | 11.4 | 0.83 (0.48-1.43) | 113 | 64.6 | 0.99 (0.90-1.08) | 128 | 73.1 | 0.99 (0.91-1.09) |
| ≥5                 | 51  | 4 (2-8)   | 10 | 19.6 | 1.75 (0.91-3.40) | 43  | 84.3 | 1.11 (0.96-1.28) | 44  | 86.3 | 1.10 (0.95-1.28) |

ARR: adjusted relative risk; CI: confidence interval; PA: physical activity; the final model included age class, college degree, BMI class (<25.0, ≥25.0), occupational PA, previous ART cycles, calories intake. Cause for infertility for smoking habits, and MDS score for PA were also included.

\* p=0.047 as compared to never smokers

\*\* p=0.003 as compared to never smokers

## STROBE Statement—checklist of items that should be included in reports of observational studies

|                              | Item No | Recommendation                                                                                                                                                                                                                                                                                                                                                                                                                                                         |                    |
|------------------------------|---------|------------------------------------------------------------------------------------------------------------------------------------------------------------------------------------------------------------------------------------------------------------------------------------------------------------------------------------------------------------------------------------------------------------------------------------------------------------------------|--------------------|
| Title and abstract           | 1       | (a) Indicate the study's design with a commonly used term in the title or the abstract                                                                                                                                                                                                                                                                                                                                                                                 | Title and abstract |
|                              |         | (b) Provide in the abstract an informative and balanced summary of what was done and what was found                                                                                                                                                                                                                                                                                                                                                                    | p.2                |
| <b>Introduction</b>          |         |                                                                                                                                                                                                                                                                                                                                                                                                                                                                        |                    |
| Background/rationale         | 2       | Explain the scientific background and rationale for the investigation being reported                                                                                                                                                                                                                                                                                                                                                                                   | p. 4-5             |
| Objectives                   | 3       | State specific objectives, including any prespecified hypotheses                                                                                                                                                                                                                                                                                                                                                                                                       | p.5                |
| <b>Methods</b>               |         |                                                                                                                                                                                                                                                                                                                                                                                                                                                                        |                    |
| Study design                 | 4       | Present key elements of study design early in the paper                                                                                                                                                                                                                                                                                                                                                                                                                | p. 5               |
| Setting                      | 5       | Describe the setting, locations, and relevant dates, including periods of recruitment, exposure, follow-up, and data collection                                                                                                                                                                                                                                                                                                                                        | p. 5-6             |
| Participants                 | 6       | (a) <i>Cohort study</i> —Give the eligibility criteria, and the sources and methods of selection of participants. Describe methods of follow-up<br><i>Case-control study</i> —Give the eligibility criteria, and the sources and methods of case ascertainment and control selection. Give the rationale for the choice of cases and controls<br><i>Cross-sectional study</i> —Give the eligibility criteria, and the sources and methods of selection of participants | p. 6-7             |
|                              |         | (b) <i>Cohort study</i> —For matched studies, give matching criteria and number of exposed and unexposed<br><i>Case-control study</i> —For matched studies, give matching criteria and the number of controls per case                                                                                                                                                                                                                                                 | p. 6-7             |
| Variables                    | 7       | Clearly define all outcomes, exposures, predictors, potential confounders, and effect modifiers. Give diagnostic criteria, if applicable                                                                                                                                                                                                                                                                                                                               | p. 6-7             |
| Data sources/<br>measurement | 8*      | For each variable of interest, give sources of data and details of methods of assessment (measurement). Describe comparability of assessment methods if there is more than one group                                                                                                                                                                                                                                                                                   | p. 6-7             |
| Bias                         | 9       | Describe any efforts to address potential sources of bias                                                                                                                                                                                                                                                                                                                                                                                                              | p.8                |
| Study size                   | 10      | Explain how the study size was arrived at                                                                                                                                                                                                                                                                                                                                                                                                                              | p. 8               |
| Quantitative variables       | 11      | Explain how quantitative variables were handled in the analyses. If applicable, describe which groupings were chosen and why                                                                                                                                                                                                                                                                                                                                           | p.8                |
| Statistical methods          | 12      | (a) Describe all statistical methods, including those used to control for confounding                                                                                                                                                                                                                                                                                                                                                                                  | p.8                |
|                              |         | (b) Describe any methods used to examine subgroups and interactions                                                                                                                                                                                                                                                                                                                                                                                                    | p.8                |
|                              |         | (c) Explain how missing data were addressed                                                                                                                                                                                                                                                                                                                                                                                                                            | -                  |
|                              |         | (d) <i>Cohort study</i> —If applicable, explain how loss to follow-up was addressed<br><i>Case-control study</i> —If applicable, explain how matching of cases and controls was addressed<br><i>Cross-sectional study</i> —If applicable, describe analytical methods                                                                                                                                                                                                  | -                  |

|  |  |                                       |                         |
|--|--|---------------------------------------|-------------------------|
|  |  | taking account of sampling strategy   |                         |
|  |  | (e) Describe any sensitivity analyses | No sensitivity analyses |

Continued on next page

For peer review only

| <b>Results</b>           |     |                                                                                                                                                                                                                      |                         |
|--------------------------|-----|----------------------------------------------------------------------------------------------------------------------------------------------------------------------------------------------------------------------|-------------------------|
| Participants             | 13* | (a) Report numbers of individuals at each stage of study—eg numbers potentially eligible, examined for eligibility, confirmed eligible, included in the study, completing follow-up, and analysed                    | p.9                     |
|                          |     | (b) Give reasons for non-participation at each stage                                                                                                                                                                 | n.a.                    |
|                          |     | (c) Consider use of a flow diagram                                                                                                                                                                                   | n.a.                    |
| Descriptive data         | 14* | (a) Give characteristics of study participants (eg demographic, clinical, social) and information on exposures and potential confounders                                                                             | p.9                     |
|                          |     | (b) Indicate number of participants with missing data for each variable of interest                                                                                                                                  | p.9                     |
|                          |     | (c) <i>Cohort study</i> —Summarise follow-up time (eg, average and total amount)<br><i>Implicit: for each women, the time between ART initiation and outcome (embryo transfer, clinical pregnancy and livebirth)</i> | -                       |
| Outcome data             | 15* | <i>Cohort study</i> —Report numbers of outcome events or summary measures over time                                                                                                                                  | p.9                     |
|                          |     | <i>Case-control study</i> —Report numbers in each exposure category, or summary measures of exposure                                                                                                                 | -                       |
|                          |     | <i>Cross-sectional study</i> —Report numbers of outcome events or summary measures                                                                                                                                   | -                       |
| Main results             | 16  | (a) Give unadjusted estimates and, if applicable, confounder-adjusted estimates and their precision (eg, 95% confidence interval). Make clear which confounders were adjusted for and why they were included         | p.9-10<br>Table 1 and 2 |
|                          |     | (b) Report category boundaries when continuous variables were categorized                                                                                                                                            | p.9-10<br>Table 1 and 2 |
|                          |     | (c) If relevant, consider translating estimates of relative risk into absolute risk for a meaningful time period                                                                                                     | -                       |
| Other analyses           | 17  | Report other analyses done—eg analyses of subgroups and interactions, and sensitivity analyses                                                                                                                       | p. 9                    |
| <b>Discussion</b>        |     |                                                                                                                                                                                                                      |                         |
| Key results              | 18  | Summarise key results with reference to study objectives                                                                                                                                                             | p.11                    |
| Limitations              | 19  | Discuss limitations of the study, taking into account sources of potential bias or imprecision. Discuss both direction and magnitude of any potential bias                                                           | p.14                    |
| Interpretation           | 20  | Give a cautious overall interpretation of results considering objectives, limitations, multiplicity of analyses, results from similar studies, and other relevant evidence                                           | p.11-13                 |
| Generalisability         | 21  | Discuss the generalisability (external validity) of the study results                                                                                                                                                | p.14                    |
| <b>Other information</b> |     |                                                                                                                                                                                                                      |                         |
| Funding                  | 22  | Give the source of funding and the role of the funders for the present study and, if applicable, for the original study on which the present article is based                                                        | p. 16                   |

\*Give information separately for cases and controls in case-control studies and, if applicable, for exposed and unexposed groups in cohort and cross-sectional studies.

**Note:** An Explanation and Elaboration article discusses each checklist item and gives methodological background and published examples of transparent reporting. The STROBE checklist is best used in conjunction with this article (freely available on the Web sites of PLoS Medicine at <http://www.plosmedicine.org/>, Annals of Internal Medicine at <http://www.annals.org/>, and Epidemiology at <http://www.epidem.com/>). Information on the STROBE Initiative is available at [www.strobe-statement.org](http://www.strobe-statement.org).



# BMJ Open

## Pre-treatment maternal lifestyle and outcomes of assisted reproduction: an Italian cohort study.

|                                 |                                                                                                                                                                                                                                                                                                                                                                                                                                                                                                                                                                                                                                                                                                                                                                                                                                                                                                                                                                                                                                                                                                                                                                                                                                                                                                          |
|---------------------------------|----------------------------------------------------------------------------------------------------------------------------------------------------------------------------------------------------------------------------------------------------------------------------------------------------------------------------------------------------------------------------------------------------------------------------------------------------------------------------------------------------------------------------------------------------------------------------------------------------------------------------------------------------------------------------------------------------------------------------------------------------------------------------------------------------------------------------------------------------------------------------------------------------------------------------------------------------------------------------------------------------------------------------------------------------------------------------------------------------------------------------------------------------------------------------------------------------------------------------------------------------------------------------------------------------------|
| Journal:                        | <i>BMJ Open</i>                                                                                                                                                                                                                                                                                                                                                                                                                                                                                                                                                                                                                                                                                                                                                                                                                                                                                                                                                                                                                                                                                                                                                                                                                                                                                          |
| Manuscript ID                   | bmjopen-2020-038837.R2                                                                                                                                                                                                                                                                                                                                                                                                                                                                                                                                                                                                                                                                                                                                                                                                                                                                                                                                                                                                                                                                                                                                                                                                                                                                                   |
| Article Type:                   | Original research                                                                                                                                                                                                                                                                                                                                                                                                                                                                                                                                                                                                                                                                                                                                                                                                                                                                                                                                                                                                                                                                                                                                                                                                                                                                                        |
| Date Submitted by the Author:   | 21-Oct-2020                                                                                                                                                                                                                                                                                                                                                                                                                                                                                                                                                                                                                                                                                                                                                                                                                                                                                                                                                                                                                                                                                                                                                                                                                                                                                              |
| Complete List of Authors:       | Ricci, Elena; Ospedale Maggiore Policlinico, Dipartimento della Donna, del Neonato e del Bambino, Noli, Stefania; Università degli Studi di Milano, Department of Clinical Sciences and Community Health, . Ferrari, Stefania; Fondazione Ca' Granda Ospedale Maggiore policlinico, Infertility Unit<br>La Vecchia, Irene; Università degli Studi di Milano, Department of Clinical Sciences and Community Health, . De Cosmi, Valentina; La Fondazione IRCCS Ospedale Maggiore Policlinico, Pediatric Intermediate Care Unit<br>Castiglioni, Marta; Università degli Studi di Milano, Department of Clinical Sciences and Community Health, . Somigliana, Edgardo; Ospedale Maggiore Policlinico, Dipartimento della Donna, del Neonato e del Bambino,; Università degli Studi di Milano, Department of Clinical Sciences and Community Health, . Agostoni, Carlo; University of Milan, Department of Pediatrics, Fondazione IRCCS Ca' Granda-Ospedale Maggiore Policlinico<br>Cipriani, Sonia; Fondazione Istituto di Ricovero e Cura a Carattere Scientifico (IRCCS) Ca' Granda Ospedale Maggiore Policlinico, Department of Woman, Newborn and Child, Mauri, Paola; Università degli Studi di Milano, Department of Clinical Sciences and Community Health, . Parazzini, Fabio; University of Milan, |
| <b>Primary Subject Heading</b>: | Obstetrics and gynaecology                                                                                                                                                                                                                                                                                                                                                                                                                                                                                                                                                                                                                                                                                                                                                                                                                                                                                                                                                                                                                                                                                                                                                                                                                                                                               |
| Secondary Subject Heading:      | Smoking and tobacco, Sports and exercise medicine                                                                                                                                                                                                                                                                                                                                                                                                                                                                                                                                                                                                                                                                                                                                                                                                                                                                                                                                                                                                                                                                                                                                                                                                                                                        |
| Keywords:                       | Reproductive medicine < GYNAECOLOGY, Subfertility < GYNAECOLOGY, EPIDEMIOLOGY                                                                                                                                                                                                                                                                                                                                                                                                                                                                                                                                                                                                                                                                                                                                                                                                                                                                                                                                                                                                                                                                                                                                                                                                                            |
|                                 |                                                                                                                                                                                                                                                                                                                                                                                                                                                                                                                                                                                                                                                                                                                                                                                                                                                                                                                                                                                                                                                                                                                                                                                                                                                                                                          |

SCHOLARONE™  
Manuscripts



I, the Submitting Author has the right to grant and does grant on behalf of all authors of the Work (as defined in the below author licence), an exclusive licence and/or a non-exclusive licence for contributions from authors who are: i) UK Crown employees; ii) where BMJ has agreed a CC-BY licence shall apply, and/or iii) in accordance with the terms applicable for US Federal Government officers or employees acting as part of their official duties; on a worldwide, perpetual, irrevocable, royalty-free basis to BMJ Publishing Group Ltd ("BMJ") its licensees and where the relevant Journal is co-owned by BMJ to the co-owners of the Journal, to publish the Work in this journal and any other BMJ products and to exploit all rights, as set out in our [licence](#).

The Submitting Author accepts and understands that any supply made under these terms is made by BMJ to the Submitting Author unless you are acting as an employee on behalf of your employer or a postgraduate student of an affiliated institution which is paying any applicable article publishing charge ("APC") for Open Access articles. Where the Submitting Author wishes to make the Work available on an Open Access basis (and intends to pay the relevant APC), the terms of reuse of such Open Access shall be governed by a Creative Commons licence – details of these licences and which [Creative Commons](#) licence will apply to this Work are set out in our licence referred to above.

Other than as permitted in any relevant BMJ Author's Self Archiving Policies, I confirm this Work has not been accepted for publication elsewhere, is not being considered for publication elsewhere and does not duplicate material already published. I confirm all authors consent to publication of this Work and authorise the granting of this licence.

1  
2  
3 **Pre-treatment maternal lifestyle and outcomes of assisted reproduction: an Italian**  
4 **cohort study.**  
5

6  
7 Elena Ricci,<sup>1</sup> Stefania Noli,<sup>2</sup> Stefania Ferrari,<sup>2</sup> Irene La Vecchia,<sup>2</sup> Valentina De Cosmi,<sup>3</sup> Marta  
8 Castiglioni,<sup>2</sup> Edgardo Somigliana,<sup>1,2</sup> Carlo Agostoni,<sup>4</sup> Sonia Cipriani,<sup>1</sup> Paola Agnese Mauri,<sup>2</sup>  
9 Fabio Parazzini,<sup>1,2</sup>  
10  
11

12  
13  
14 1 Department of Woman, Newborn and Child, Fondazione Istituto di Ricovero e Cura a Carattere Scientifico  
15 (IRCCS) Ca' Granda Ospedale Maggiore Policlinico, Milan, Italy.  
16

17  
18 2 Department of Clinical Sciences and Community Health, Università degli Studi di Milano, Milan, Italy.  
19

20 3 Pediatric Intermediate Care Unit, Fondazione IRCCS Ospedale Ca' Granda-Ospedale Maggiore Policlinico;  
21 Department of Clinical Sciences and Community Health, University of Milan, Branch of Medical Statistics,  
22 Biometry, and Epidemiology "G. A. Maccacaro", Milan, Italy  
23  
24

25  
26 4 Pediatric Intermediate Care Unit, Fondazione IRCCS Ospedale Ca' Granda-Ospedale Maggiore Policlinico,  
27 and Department of Clinical Sciences and Community Health, University of Milan, Milan, Italy.  
28  
29

30  
31  
32 **Corresponding author:**  
33

34 Elena Ricci,  
35

36 Department of Woman, Newborn and Child,  
37

38 Fondazione Istituto di Ricovero e Cura a Carattere Scientifico (IRCCS) Ca' Granda Ospedale  
39 Maggiore Policlinico  
40  
41

42 Via Commenda, 12 - 20122 Milan, Italy  
43

44 Tel: +39.02.5503; fax: +39.02.5503; e-mail: [ed.ricci@libero.it](mailto:ed.ricci@libero.it)  
45  
46

47  
48 **Short title:** Maternal lifestyle and ART outcomes  
49

50 **Word count:** 3223  
51  
52  
53  
54  
55  
56  
57  
58  
59  
60

## Abstract

**Objective.** We investigated whether lifestyle affects assisted reproduction technique (ART) outcomes.

**Design.** Cohort study.

**Setting.** Italian Fertility Unit.

**Participants.** From September 2014 to December 2016, women from couples presenting for evaluation and eligible for ART were invited to participate. Information on alcohol intake, current smoking and leisure physical activity during the year before the interview was collected, using a structured questionnaire. We considered the ART outcomes of the cycle immediately following the interview.

**Primary and secondary outcome measures.** The primary outcome measure was cumulative pregnancy rate per retrieval. Secondary measures were number of retrieved oocytes, embryo transfer and live birth.

**Results.** In 492 women undergoing an ART cycle, 427 (86.8%) underwent embryo transfer, 157 (31.9%) had at least one clinical pregnancy, 121 (24.6%) had live birth. The cumulative pregnancy rate per retrieval was 33.3% (95% CI 28.5%-38.7%). In women in the 3<sup>rd</sup> tertile of alcohol intake, adjusted relative risk (ARR) was 0.97 (95% confidence interval (CI) 0.87-1.08), 0.90 (95% CI 0.62-1.30) and 0.89 (95% CI 0.57-1.37) for embryo transfer, clinical pregnancy and live birth respectively. The corresponding figures in women currently smoking more than 5 cigarettes/day were 1.00 (95% CI 0.88-1.16), 0.94 (95% CI 0.60-1.48), and 1.14 (95% CI 0.68-1.90), and in women with physical activity  $\geq 5$  hours/week were 0.93 (95% CI 0.79-1.08), 0.44 (95% CI 0.22-0.90), and 0.48 (95% CI 0.22-1.05) respectively.

**Conclusion.** There were no significant differences in IVF outcomes among women who used alcohol or tobacco in the year prior to treatment. Conservatively, all women should be advised

1  
2  
3 to limit substance abuse. Moreover, our study suggested that maintaining a moderate, but not  
4  
5 high, level of physical activity could be beneficial.  
6  
7  
8  
9

10 **Keywords.** Alcohol intake, smoking habits, leisure physical activity, assisted reproduction  
11  
12 techniques, pregnancy, live birth.  
13  
14  
15  
16

### 17 **Strengths and limitations of this study**

- 19 • This study analysed several lifestyle factors of women interviewed in the same  
20 institution, participation was practically complete, and information on nutritional  
21 status was also available.  
22  
23
- 24 • Smoking and drinking habits were self-reported by women, so some underestimates  
25 could have occurred.  
26  
27
- 28 • Information on type of physical exercise was limited, because total number of weekly  
29 hours spent exercising was recorded, but not intensity or type of exercise.  
30  
31
- 32 • These findings regard women presenting for ART and are not generalizable to the  
33 fertile population.  
34  
35  
36  
37  
38  
39  
40  
41  
42  
43  
44  
45  
46  
47  
48  
49  
50  
51  
52  
53  
54  
55  
56  
57  
58  
59  
60

## Introduction

Alcohol consumption and smoking are among the most common lifestyle exposures in women. During the last decades, the relationship between these lifestyle factors and spontaneous fertility has been investigated in several observational studies: some have shown that alcohol and smoking affect spontaneous fertility [1,2], although not consistently [3,4].

These exposures may contribute to spontaneous reproductive failures, but they may also impair the success rate of assisted reproduction technology (ART). Thus, it is conceivable that modifying such lifestyle habits before treatments could reduce the need for ART procedures and/or enhance the likelihood of in vitro fertilization (IVF) success. In a study conducted in California, alcohol intake was negatively associated with the number of oocytes retrieved, but not with live birth rate [5]. Otherwise, in a prospective cohort study, no association emerged between alcohol intake during days 4–10 of ovarian stimulation and IVF outcomes [6]. A recent systematic revision of literature confirmed that average alcohol intake before ART initiation did not impact on the outcomes, whereas intake at the start of ART cycle had a negative effect on fertilization, embryo quality and implantation [7].

Cigarette smoking is the most common lifestyle factor that could affect IVF outcomes and several studies have demonstrated the negative effect of smoking on pregnancy rate and upon clinical outcome of ART [8]. However, literature on this issue is still limited [9], although a recent meta-analysis [10] found that current smokers undergoing ART had lower clinical pregnancy and live birth rate than non-smokers and experienced a significant increase of spontaneous miscarriage.

Evidence on physical activity (PA) was inconsistent: although data from the Nurses' Health Study II suggested that vigorous activity may reduce ovulatory infertility [11], a Norwegian cohort indicated that high intensity and frequency of PA increase sub-fertility [12]. Studies specifically on PA and ART success were equally inconsistent: investigating pre-treatment

1  
2  
3 PA, Morris et al. [13] found that women undergoing ART had a 40% reduced likelihood of  
4 live birth, if engaged in PA 4 hours or more per week for less than 10 years, compared with  
5 women not regularly engaged in PA. Another study [14] did not find a beneficial effect of  
6 activity levels before treatment on clinical outcomes, although moderate PA during ART  
7 cycle was associated with higher implantation and live birth rates. Recently, it was suggested  
8 that health-promoting lifestyle education may increase the success rates of ART, correcting  
9 risk factors that negatively affect fertility [15]. This evidence has been recently reviewed:  
10 pooled estimates from a systematic research found that physical activity before ART cycles  
11 was associated with increased rates of clinical pregnancy and live births, but no effect was  
12 shown on miscarriage rate [16].

13  
14 These factors have been analysed in relation to sperm quality. Several reviews showed that  
15 the same lifestyle habits, such as smoking and regular drinking, negatively impacting female  
16 fertility, also have a detrimental effect on semen quality [17,18]. On the contrary, the effect of  
17 physical activity is still under discussion [19,20].

18  
19 Alcohol consumption [21], smoking habits [22] and physical activity [23,24] largely vary in  
20 different populations. Thus, it is interesting to analyse the role of these lifestyles on fertility  
21 treatment in an Italian setting, using data from a cohort study conducted in an Italian Fertility  
22 Centre.

## 23 24 25 26 27 28 29 30 31 32 33 34 35 36 37 38 39 40 41 42 43 44 45 46 47 **Methods**

48  
49 From September 2014 to December 2016, in randomly selected days, sub-fertile couples,  
50 presenting for evaluation to the Fertility Unit of Fondazione IRCCS Ca' Granda, Ospedale  
51 Maggiore, Policlinico, Milan, and eligible for ART, were invited to participate into a cohort  
52 study on the role of lifestyle habits and diet on ART outcomes. The study protocol was  
53  
54  
55  
56  
57  
58  
59  
60

1  
2  
3 approved by the Institutional Ethical Review Board. All procedures were in accord with the  
4  
5 Helsinki Declaration and all participants provided written informed consent.  
6  
7

8  
9 Study participation was proposed during the diagnostic phase. Couples were interviewed on  
10  
11 the day of oocyte retrieval. The time interval between the proposal of the study and the  
12  
13 interview was generally less than one month.  
14  
15

16  
17 The overall participation rate was close to 95%, mainly since couples were interviewed during  
18  
19 the period spent waiting for the different diagnostic stages, before actual ART procedures,  
20  
21 and the not sensitive character of questions.  
22  
23

24  
25 Both partners of couples who agreed to participate were interviewed by centrally trained  
26  
27 personnel, using a standard questionnaire to obtain information on general socio-demographic  
28  
29 characteristics, anthropometric variables, personal medical history and reproductive history,  
30  
31 and lifestyle factors. Couples that cannot speak Italian were excluded from the study.  
32  
33

#### 34 *Patient and public involvement.*

35  
36

37 Patients were not involved in the design, recruitment or conduct of the study.  
38  
39

40 The present study reported on the outcome of the cycle immediately following the interview.  
41  
42

#### 43 *Procedures*

44  
45

46  
47 To evaluate the effect of recent exposure, patients were asked to report about their usual  
48  
49 weekly food consumption in the last year, using a reproducible and valid food frequency  
50  
51 questionnaire [25–27], including the weekly numbers of drinks for several alcoholic  
52  
53 beverages. The questionnaire was satisfactorily reproducible [28]. Taking into account the  
54  
55 different ethanol concentration, one unit corresponded to approximately 125 ml of wine,  
56  
57 330 ml of beer and 30 ml of hard liquor (i.e., about 12.5 g of ethanol). Total alcohol intake,  
58  
59  
60



1  
2  
3 expressed in grams of ethanol per day (g/day), was computed as the sum of all reported  
4 alcoholic beverages. “Never drinkers” and “Ex- drinkers” were patients who abstained from  
5 drinking lifelong and for at least 12 months at the time of interview, respectively. For the  
6 purpose of this study, we considered these two groups of women in the same category  
7 “Abstainers”.

8  
9  
10  
11  
12  
13  
14  
15 A woman was considered a smoker if she had smoked  $\geq$  one cigarette/day for at least one  
16 year; a former smoker if she had smoked  $\geq$  one cigarette/day for at least one year, but had  
17 stopped more than one year before the interview, and a non-smoker if she had never smoked  $\geq$   
18 one cigarette/day.

19  
20  
21  
22  
23  
24  
25 Before starting ovarian stimulation, women were advised to abstain from alcohol and  
26 smoking, thus no such exposure should occur during ART cycle.

27  
28  
29  
30  
31 The adherence to the Mediterranean diet was assessed through an a priori score  
32 (Mediterranean diet score, MDS), developed by Trichopoulou and colleagues [29] and  
33 calculated as previously published [30]. To include MDS score in the analysis of alcohol  
34 intake, it was recalculated excluding alcohol. Satisfactory reproducibility of questions on self-  
35 reported smoking and drinking habits in our study populations has been previously reported  
36 [31].

37  
38  
39  
40  
41  
42  
43  
44  
45  
46  
47  
48  
49  
50  
51  
52  
53  
54  
55  
56  
57  
58  
59  
60  
61  
62  
63  
64  
65  
66  
67  
68  
69  
70  
71  
72  
73  
74  
75  
76  
77  
78  
79  
80  
81  
82  
83  
84  
85  
86  
87  
88  
89  
90  
91  
92  
93  
94  
95  
96  
97  
98  
99  
100  
101  
102  
103  
104  
105  
106  
107  
108  
109  
110  
111  
112  
113  
114  
115  
116  
117  
118  
119  
120  
121  
122  
123  
124  
125  
126  
127  
128  
129  
130  
131  
132  
133  
134  
135  
136  
137  
138  
139  
140  
141  
142  
143  
144  
145  
146  
147  
148  
149  
150  
151  
152  
153  
154  
155  
156  
157  
158  
159  
160  
161  
162  
163  
164  
165  
166  
167  
168  
169  
170  
171  
172  
173  
174  
175  
176  
177  
178  
179  
180  
181  
182  
183  
184  
185  
186  
187  
188  
189  
190  
191  
192  
193  
194  
195  
196  
197  
198  
199  
200  
201  
202  
203  
204  
205  
206  
207  
208  
209  
210  
211  
212  
213  
214  
215  
216  
217  
218  
219  
220  
221  
222  
223  
224  
225  
226  
227  
228  
229  
230  
231  
232  
233  
234  
235  
236  
237  
238  
239  
240  
241  
242  
243  
244  
245  
246  
247  
248  
249  
250  
251  
252  
253  
254  
255  
256  
257  
258  
259  
260  
261  
262  
263  
264  
265  
266  
267  
268  
269  
270  
271  
272  
273  
274  
275  
276  
277  
278  
279  
280  
281  
282  
283  
284  
285  
286  
287  
288  
289  
290  
291  
292  
293  
294  
295  
296  
297  
298  
299  
300  
301  
302  
303  
304  
305  
306  
307  
308  
309  
310  
311  
312  
313  
314  
315  
316  
317  
318  
319  
320  
321  
322  
323  
324  
325  
326  
327  
328  
329  
330  
331  
332  
333  
334  
335  
336  
337  
338  
339  
340  
341  
342  
343  
344  
345  
346  
347  
348  
349  
350  
351  
352  
353  
354  
355  
356  
357  
358  
359  
360  
361  
362  
363  
364  
365  
366  
367  
368  
369  
370  
371  
372  
373  
374  
375  
376  
377  
378  
379  
380  
381  
382  
383  
384  
385  
386  
387  
388  
389  
390  
391  
392  
393  
394  
395  
396  
397  
398  
399  
400  
401  
402  
403  
404  
405  
406  
407  
408  
409  
410  
411  
412  
413  
414  
415  
416  
417  
418  
419  
420  
421  
422  
423  
424  
425  
426  
427  
428  
429  
430  
431  
432  
433  
434  
435  
436  
437  
438  
439  
440  
441  
442  
443  
444  
445  
446  
447  
448  
449  
450  
451  
452  
453  
454  
455  
456  
457  
458  
459  
460  
461  
462  
463  
464  
465  
466  
467  
468  
469  
470  
471  
472  
473  
474  
475  
476  
477  
478  
479  
480  
481  
482  
483  
484  
485  
486  
487  
488  
489  
490  
491  
492  
493  
494  
495  
496  
497  
498  
499  
500  
501  
502  
503  
504  
505  
506  
507  
508  
509  
510  
511  
512  
513  
514  
515  
516  
517  
518  
519  
520  
521  
522  
523  
524  
525  
526  
527  
528  
529  
530  
531  
532  
533  
534  
535  
536  
537  
538  
539  
540  
541  
542  
543  
544  
545  
546  
547  
548  
549  
550  
551  
552  
553  
554  
555  
556  
557  
558  
559  
560  
561  
562  
563  
564  
565  
566  
567  
568  
569  
570  
571  
572  
573  
574  
575  
576  
577  
578  
579  
580  
581  
582  
583  
584  
585  
586  
587  
588  
589  
590  
591  
592  
593  
594  
595  
596  
597  
598  
599  
600  
601  
602  
603  
604  
605  
606  
607  
608  
609  
610  
611  
612  
613  
614  
615  
616  
617  
618  
619  
620  
621  
622  
623  
624  
625  
626  
627  
628  
629  
630  
631  
632  
633  
634  
635  
636  
637  
638  
639  
640  
641  
642  
643  
644  
645  
646  
647  
648  
649  
650  
651  
652  
653  
654  
655  
656  
657  
658  
659  
660  
661  
662  
663  
664  
665  
666  
667  
668  
669  
670  
671  
672  
673  
674  
675  
676  
677  
678  
679  
680  
681  
682  
683  
684  
685  
686  
687  
688  
689  
690  
691  
692  
693  
694  
695  
696  
697  
698  
699  
700  
701  
702  
703  
704  
705  
706  
707  
708  
709  
710  
711  
712  
713  
714  
715  
716  
717  
718  
719  
720  
721  
722  
723  
724  
725  
726  
727  
728  
729  
730  
731  
732  
733  
734  
735  
736  
737  
738  
739  
740  
741  
742  
743  
744  
745  
746  
747  
748  
749  
750  
751  
752  
753  
754  
755  
756  
757  
758  
759  
760  
761  
762  
763  
764  
765  
766  
767  
768  
769  
770  
771  
772  
773  
774  
775  
776  
777  
778  
779  
780  
781  
782  
783  
784  
785  
786  
787  
788  
789  
790  
791  
792  
793  
794  
795  
796  
797  
798  
799  
800  
801  
802  
803  
804  
805  
806  
807  
808  
809  
810  
811  
812  
813  
814  
815  
816  
817  
818  
819  
820  
821  
822  
823  
824  
825  
826  
827  
828  
829  
830  
831  
832  
833  
834  
835  
836  
837  
838  
839  
840  
841  
842  
843  
844  
845  
846  
847  
848  
849  
850  
851  
852  
853  
854  
855  
856  
857  
858  
859  
860  
861  
862  
863  
864  
865  
866  
867  
868  
869  
870  
871  
872  
873  
874  
875  
876  
877  
878  
879  
880  
881  
882  
883  
884  
885  
886  
887  
888  
889  
890  
891  
892  
893  
894  
895  
896  
897  
898  
899  
900  
901  
902  
903  
904  
905  
906  
907  
908  
909  
910  
911  
912  
913  
914  
915  
916  
917  
918  
919  
920  
921  
922  
923  
924  
925  
926  
927  
928  
929  
930  
931  
932  
933  
934  
935  
936  
937  
938  
939  
940  
941  
942  
943  
944  
945  
946  
947  
948  
949  
950  
951  
952  
953  
954  
955  
956  
957  
958  
959  
960  
961  
962  
963  
964  
965  
966  
967  
968  
969  
970  
971  
972  
973  
974  
975  
976  
977  
978  
979  
980  
981  
982  
983  
984  
985  
986  
987  
988  
989  
990  
991  
992  
993  
994  
995  
996  
997  
998  
999  
1000

Leisure PA was defined as the number of hours per week of a sport or activity such as walking, gardening, cycling, etc., in the year preceding the interview. Scores ranged between 1 and 4, corresponding to  $<2$ , 2–4, 5–7 and  $>7$  h of PA per week. No information was available on intensity of activity.

Patients were managed according to a standardized clinical protocol as reported in details elsewhere [32,33]. The choice between conventional IVF or Intra-Cytoplasmic Sperm Injection (ICSI) was made based on semen characteristics. Good quality oocytes were those in

1  
2  
3 metaphase I-II for IVF and metaphase II for ICSI. The main outcome was the cumulative  
4 pregnancy rate per retrieval in the cycle immediately following the interview.  
5  
6

7 All clinical information (including infertility diagnosis) was collected from medical records.  
8  
9

### 10 *Statistical analysis*

11

12 Clinical pregnancy was considered the main objective of the study. Considering a 30% of  
13 pregnancy rate per cycle, as usual in our Fertility Centre, this study was powered to detect a  
14  
15 1.5 increase of risk in the highest tertile of intake as compared to the lowest ( $\alpha=0.05$ ,  $\beta=0.80$ ).  
16  
17

18 Multiple outcomes were considered: 1. Number of retrieved good quality oocytes; 2. Embryo  
19 transfer; 3. Clinical pregnancy; 4: Live birth. Patients who failed each treatment stage were  
20 included in the following stage as failures. Women with a previous miscarriage and a  
21 pregnancy or livebirth after the following embryo transfer were considered as having a  
22 successful pregnancy and livebirth.  
23  
24  
25  
26  
27  
28  
29

30 Categorical variables were described as frequency (N) and percentage (%) and compared  
31 using the Pearson or Mantel-Haenzsel chi-square, as appropriate. Continuous variables were  
32 described as mean and standard deviation (SD) if normally distributed, or median and  
33 interquartile range (IQR) if not normally distributed and analysed using analysis of variance  
34 and Kruskal-Wallis test respectively. Correlations were evaluated using Pearson r or  
35 Spearman rho coefficients, as appropriate.  
36  
37  
38  
39  
40  
41  
42  
43

44 We used multivariable generalized linear mixed models to evaluate the association of  
45 exposure variables with treatment outcomes. We used a Poisson distribution and log link  
46 function for the number of good quality oocytes retrieved, and binomial distribution and logit  
47 link function for clinical outcomes. We estimated relative risks (RRs) of each clinical  
48 outcome and corresponding 95% CIs in categories of alcohol intake (approximate tertiles),  
49 former and current smoking (no,  $\leq 5$ ,  $>5$  cigarettes/day) and leisure PA ( $<2$ , 2-4,  $\geq 5$   
50 hours/week) in the year before the interview.  
51  
52  
53  
54  
55  
56  
57  
58  
59  
60

1  
2  
3 To account for potential confounders, we included terms for variables, that were associated  
4 with these modifiable lifestyles, and/or with at least one ART outcome, in the general linear  
5 model and multiple log-binomial regression models (as indicated in table footnotes). Terms  
6 for interaction were tested.  
7  
8  
9

10  
11  
12 All the analyses were performed using the SAS software, version 9.4 (SAS Institute, Inc.,  
13 Cary, NC, USA).  
14  
15  
16

## 17 18 19 **Results**

20  
21 From September 2014 to December 2016, out of 501 women undergoing ART cycle, 9  
22 (1.8%) did not provide complete information about their lifestyle, or were lost to follow-up,  
23 and were excluded from this analysis. Analysis was then performed on 492 ART cycle  
24 outcomes from 492 women.  
25  
26  
27  
28

29  
30 Mean age was 36.6 years (standard deviation, SD, 3.6 range 27-45) and mean body mass  
31 index (BMI) was 22.3 kg/m<sup>2</sup> (SD 3.9, range 16.4-41.7). Thirty women (6.1%) were obese  
32 (BMI ≥ 30.0 kg/m<sup>2</sup>).  
33  
34  
35

36  
37 The characteristics of women according to alcohol, smoking habits and PA are shown in  
38 Table 1.  
39  
40

41  
42 Only 16 women (3.2%) exercised more than 7 hours per week, so we merged the two  
43 categories 5-7 and >7 hours/week. Leisure PA was associated with college degree and higher  
44 MDS, and inversely with daily calories intake.  
45  
46  
47

48  
49 Of the 492 initiated cycles in each woman, 427 (86.8%) resulted in embryo transfer, 157  
50 (31.9%) in clinical pregnancy, 121 (24.6%) in live births. Out of 36 clinical pregnancies not  
51 resulting in live birth, 34 ended with miscarriage, one with an induced abortion, and one was  
52 extra-uterine.  
53  
54  
55  
56  
57  
58  
59  
60

1  
2  
3 Seventy-two (14.6%) women underwent two, 28 (5.7%) three, 4 (0.8%)  $\geq 4$  embryo transfers.

4  
5 Out of 157 women with pregnancy, 7 had a miscarriage at first attempt and livebirth at the  
6  
7 second one, for a total of 164 pregnancies in 492 women. The cumulative pregnancy rate per  
8  
9 retrieval was 33.3% (95% CI 28.5%-38.7%).

10  
11  
12 Age was the main risk factor for ART failure. The median of good quality oocytes was 6  
13  
14 (IQR 4-9) in women  $< 35$  years old, 5 (IQR 3-8) in 35-39, 3 (IQR 2-6) in women aged  $\geq 40$   
15  
16 years ( $p < 0.0001$ ). No association was observed at univariate analysis with alcohol intake,  
17  
18 current smoking or leisure PA. As compared to women aged  $< 35$ , RR for successful embryo  
19  
20 transfer was 0.92 (95% CI 0.86-0.98) for women aged 35-39 and 0.90 (95% CI 0.82-0.98) for  
21  
22 those aged  $\geq 40$  years. The corresponding figures were 0.78 (95% CI 0.59-1.01) and 0.44  
23  
24 (95% CI 0.29-0.68) for clinical pregnancy; 0.66 (95% CI 0.48-0.91) and 0.34 (95% CI 0.20-  
25  
26 0.59) for live birth.

27  
28  
29 At univariate analysis, leisure PA  $\geq 5$  hours/week was significantly associated with lower risk  
30  
31 of clinical pregnancy (RR 0.48, 95% CI 0.25-0.93), whereas no relationship was observed  
32  
33 with embryo transfer and live birth. Alcohol intake and current smoking were not  
34  
35 significantly associated with any ART outcomes.

36  
37  
38 Table 2 shows the relation between exposures and clinical results, accounting for potential  
39  
40 confounders. No significant association was observed between smoking, alcohol intake and  
41  
42 leisure PA, thus they were not mutually adjusted. Terms for interaction between smoking,  
43  
44 alcohol intake and leisure PA did not show any significance and were excluded from the final  
45  
46 models.

47  
48  
49 In this sample, 28 (5.7%) women drank at least 1 alcohol unit per day. Although the ARR for  
50  
51 embryo transfer was lower, it was not significant as compared to abstainers, and no effect was  
52  
53 observed on other outcomes. ARR for embryo transfer was significantly lower in six women  
54  
55 who smoked  $\geq 20$  cigarettes/day during the year before ART procedure. Former smokers who  
56  
57  
58  
59  
60

1  
2  
3 stopped smoking more than 5 years before undergoing ART had a higher number of oocytes  
4  
5 than never smokers.  
6

7  
8 Analysing alcohol intake (g) and number of cigarettes as continuous variables, we did not find  
9  
10 any significant correlation with number of high-quality oocytes. Since most women did not  
11  
12 smoke, median intakes were 0 (IQR 0-0) in all categories and no differences could be  
13  
14 observed. As regards alcohol, women who underwent embryo transfer had median intakes  
15  
16 lower than those who did not (1.9 (IQR 0-5.3) vs. 2.7 (IQR 0-7.5 g/day),  $p=0.16$ ); those who  
17  
18 achieved clinical pregnancy consumed 1.8 (IQR 0-4.7) g/day and those who did not achieve it  
19  
20 consumed 2.4 (IQR 0-5.6) g/day ( $p=0.11$ ). Women with livebirth had lower alcohol intake  
21  
22 than those without livebirth (1.8 (IQR 0-5.3) vs 2.3 (IQR 0-5.6) g/day,  $p=0.20$ ). None of these  
23  
24 differences was statistically significant.  
25  
26

27  
28 Considering ICSI and IVF separately, ART outcomes were similar, and including this  
29  
30 variable in the equations did not affect the risk estimation.  
31

32  
33 Finally, we controlled these results for partner's characteristics and lifestyle, in a subgroup of  
34  
35 324 couples with complete information for both male and female. Men's age was significantly  
36  
37 associated with higher rate of negative outcomes in the univariate analysis, but when  
38  
39 including women's age in the model this relationship lost significance. As regards to women  
40  
41 lifestyle, results did not change. Men's lifestyle (smoking, alcohol drinking and physical  
42  
43 activity) did not significantly impact on ART outcomes.  
44  
45  
46  
47  
48

## 49 **Discussion**

50  
51 In this sample of women referring to an Italian Fertility centre, did not play a significant role  
52  
53 in the outcome of ART, except for heavy smoking, associated with fewer good quality  
54  
55 oocytes, and high physical activity, associated with lower rate of pregnancy  
56  
57

### 58 ***Alcohol***

1  
2  
3 The role of alcohol intake on spontaneous fertility has been associated with decreased fertility  
4 and chance of conception [4,34,35]. A recent meta-analysis of observational studies,  
5 including about 100,000 women, suggested that alcohol consumption was associated with  
6 reduced fecundability [36]. In biological terms, alcohol may lower fertility affecting  
7 endogenous hormone levels [37] and embryo quality [38].

8  
9  
10  
11  
12  
13  
14 The role of alcohol intake on ART success rate has been analysed in some studies showing  
15 inconsistent results [5,6,39,40]. These differences may be partially due to the high  
16 heterogeneity between studies, in particular in terms of intake prevalence. For example, in  
17 Boston, US, a study, found that 30% of women reporting >1 unit/day of alcohol intake had an  
18 increased risk of adverse outcome, but no association between low to moderate alcohol  
19 consumption was observed [39]. Literature suggests that alcohol drinking at start of ART may  
20 exert a detrimental effect, but the evidence is still limited [7].

21  
22  
23  
24  
25  
26  
27  
28  
29  
30  
31  
32  
33  
34  
35  
36  
37  
38  
39  
40  
41  
42  
43  
44  
45  
46  
47  
48  
49  
50  
51  
52  
53  
54  
55  
56  
57  
58  
59  
60  
Along this line, we did not find any association between alcohol intake and ART outcomes,  
but we were not able to analyse the effect of high alcohol intake, present in only 5.7% of our  
sample.

### ***Smoking***

Since it appears to have a detrimental effect on spontaneous fertility [1,41], it has been  
suggested that cigarette smoking may affect IVF outcomes as well.

However, individual studies available on this issue do not always support a significant  
association between smoking and IVF success or oocyte quality. For example, in a study  
conducted in Australia in women undergoing IVF [6], the mean number of oocytes did not  
significantly differ between regular smokers (11.1, SD 6.5), ex-smokers (11.8, SD 10.1) or  
non-smokers (11.2, SD 7.6), indicating that smoking might not influence oocytes production.  
Interestingly, the same analysis showed that fertilization rates were not influenced by current  
smoking status but decreased as years of smoking increased ( $p < 0.001$ ).

1  
2  
3 In a large Dutch nationwide retrospective analysis conducted on 8457 patients [42], no  
4  
5 significant difference was observed in the mean number of oocytes retrieved between non-  
6  
7 smokers and smokers, yet there were significantly lower clinical pregnancy and live birth  
8  
9 rates for smoking patients.  
10

11  
12 These findings regarding clinical pregnancies and live birth rate were further confirmed by  
13  
14 more recent meta-analysis and reviews [8,9]. As regards to former smokers, they tend to have  
15  
16 better ART outcomes than current smokers [7], but the evidence is scanty about the influence  
17  
18 of smoking cessation on ART outcomes.  
19

20  
21 Vanegas et al. suggested that male smoking could also be associated with ART outcomes  
22  
23 [43]. Whereas male current smoking did not affect the different stages of ART (egg retrieval,  
24  
25 fertilization, embryo transfer, implantation, clinical pregnancy and livebirth), among past  
26  
27 smokers every additional year since a man had quit smoking reduced the risk of failing ART  
28  
29 by 4%, particularly between clinical pregnancy and live birth.  
30  
31

32  
33 In our sample, good quality oocytes number was significantly lower in women who had  
34  
35 smoked 20 or more cigarettes per day in the year before ART procedure, as compared to  
36  
37 never smokers, as well as to women currently smoking 5 or less cigarettes/day. No significant  
38  
39 effect was observed on clinical pregnancy and live birth. However, only six women had such  
40  
41 a high level of smoking, thus our estimates should be considered with caution. Male smoking  
42  
43 did not appear as a contributing factor to ART failure.  
44  
45  
46  
47  
48

### 49 ***Leisure Physical Activity***

50  
51 Findings from literature are inconsistent. Among 2,232 patients prospectively enrolled before  
52  
53 their first IVF cycle, Morris et al. [13] found that women who exercised 4 or more hours per  
54  
55 week, for 1-9 years before ART cycle, were more likely to experience an implantation failure  
56  
57  
58  
59  
60

1  
2  
3 (OR 2.0, 95% CI 1.4-3.1) or pregnancy loss (OR 2.0, CI 1.2-3.4) than women who did not  
4  
5 report exercise.  
6

7  
8 On the contrary, in a group of 131 women [14] those who were physically more active during  
9  
10 the ART procedure were more likely to have an increased implantation rate and a live birth;  
11  
12 none of these women met the criteria for high PA, so that the comparison was done between  
13  
14 low and moderate PA. On the same line, an observational study [44] found that a self-reported  
15  
16 active lifestyle in the preceding year affected favourably the ART outcome in 121 women,  
17  
18 with clinical pregnancy more likely in women with a level above median for each kind of  
19  
20 activity: active living (OR 1.96, 95% CI 1.09-3.50), sports/exercise (OR 1.48, 95% CI 1.02–  
21  
22 2.15), and total activity (OR 1.52, 95% CI 1.15–2.01). Recently, findings from the EARTH  
23  
24 Study [45] suggested that time spent in moderate-to-vigorous physical activities before IVF  
25  
26 was not associated with probability of implantation, clinical pregnancy or live birth, in 273  
27  
28 women who underwent 427 IVF cycles. Pooled estimates from a recent meta-analysis [16]  
29  
30 suggested a beneficial effect of PA on ART outcomes, and no effect on spontaneous abortion;  
31  
32 despite this, study results are widely heterogeneous.  
33  
34  
35  
36

37 In our sample, we found a lower risk of clinical pregnancy in women with  $\geq 5$  hours/week of  
38  
39 leisure PA, but this relationship was not significant as regards livebirth.  
40

#### 41 42 ***Strengths and Limitations.*** 43

44 Potential limitations should be considered. All information on smoking and drinking was self-  
45  
46 reported by women, so some underestimates could have occurred. However, in Italy, alcohol  
47  
48 consumption is socially accepted and recommendations to avoid alcohol to protect fertility  
49  
50 have not received widespread attention and are not routinely advocated by gynaecologists  
51  
52 before IVF.  
53

54 Other sources of bias, including selection or confounding factors, are also unlikely to have  
55  
56 produced marked effects, especially considering that all women were interviewed in the same  
57  
58  
59  
60



1  
2  
3 institution and that participation was practically complete. Moreover, we analysed  
4  
5 information on nutritional status, and their inclusion into the model did not change the  
6  
7 estimated RRs.  
8  
9

10 A further limitation was that knowledge regarding type of physical exercise was limited,  
11  
12 because we recorded total number of weekly hours spent exercising, but not intensity or type  
13  
14 of exercise.  
15  
16

17 Comparing the clinical pregnancy percentage in women who did not drink at all and those in  
18  
19 the 3<sup>rd</sup> tertile of intake, the power of detecting a significant difference was about 13%. Using  
20  
21 our data, with 30% prevalence of abstainers, we could identify a RR of not achieving clinical  
22  
23 pregnancy of 1.8 for drinkers.  
24  
25

26 Lastly, this study only included women presenting for ART, thus the findings are not  
27  
28 generalizable to the wider population.  
29  
30

### 31 **Conclusions**

32  
33 Our study did not show significant differences in IVF outcomes among women who used  
34  
35 alcohol or tobacco in the year prior to treatment. Considering that reassuring results of our  
36  
37 study were related to moderate alcohol intake and cigarette smoking, conservatively all  
38  
39 women seeking pregnancy should be advised to limit or avoid substance abuse. Moderate  
40  
41 physical activity as a part of a healthy lifestyle is also advisable, although current knowledge  
42  
43 does not support consistent evidence of a direct beneficial effect.  
44  
45  
46  
47  
48  
49  
50  
51  
52  
53  
54  
55  
56  
57  
58  
59  
60

**Declarations****Ethics approval and consent to participate.**

The study protocol was approved by the Ethical Review Board of Fondazione IRCCS Ca' Granda Ospedale Maggiore Policlinico, Milano Area B (reference number 2616, 1421/2014).

All patients included gave their written informed consent to participate in the study.

**Availability of data and materials.**

The dataset analysed during the current study is available from the corresponding author on reasonable request.

**Competing interests.**

The authors declare that they do not have any competing interests.

**Funding**

No funding was obtained for this study.

**Data sharing.**

Data are available upon reasonable request addressed to the corresponding author.

**Authors' contribution**

FP and ILV designed the research study; MC, ES, PAM and SN contributed to data acquisition and interpretation; ER, SC and VDC analysed the data; SF, ES, CA and FP interpreted the information and wrote the paper.

**Acknowledgements**

We are indebted with Marco Reschini, Benedetta Gallotti e Maria Cavadini for their valuable contribution to data collection and patients' counselling, and with Francesca Bravi for her support to data analysis.

## References

- [1] Hassan MAM, Killick SR. Negative lifestyle is associated with a significant reduction in fecundity. *Fertil Steril* 2004;81:384–92. <https://doi.org/10.1016/j.fertnstert.2003.06.027>.
- [2] Oboni JB, Marques-Vidal P, Bastardot F, Vollenweider P, Waeber G. Impact of smoking on fertility and age of menopause: A population-based assessment. *BMJ Open* 2016;6:e012015. <https://doi.org/10.1136/bmjopen-2016-012015>.
- [3] Hawkins Bressler L, Bernardi LA, De Chavez PJD, Baird DD, Carnethon MR, Marsh EE. Alcohol, cigarette smoking, and ovarian reserve in reproductive-age African-American women. *Am J Obstet Gynecol* 2016;215:758.e1-758.e9. <https://doi.org/10.1016/j.ajog.2016.07.012>.
- [4] Mikkelsen EM, Riis AH, Wise LA, Hatch EE, Rothman KJ, Cueto HT, et al. Alcohol consumption and fecundability: Prospective Danish cohort study. *BMJ* 2016;354:i4262. <https://doi.org/10.1136/bmj.i4262>.
- [5] Klonoff-Cohen H, Lam-Kruglick P, Gonzalez C. Effects of maternal and paternal alcohol consumption on the success rates of in vitro fertilization and gamete intrafallopian transfer. *Fertil Steril* 2003;79:330–9. [https://doi.org/10.1016/S0015-0282\(02\)04582-X](https://doi.org/10.1016/S0015-0282(02)04582-X).
- [6] Firms S, Cruzat VF, Keane KN, Joesbury KA, Lee AH, Newsholme P, et al. The effect of cigarette smoking, alcohol consumption and fruit and vegetable consumption on IVF outcomes: A review and presentation of original data. *Reprod Biol Endocrinol* 2015;13. <https://doi.org/10.1186/s12958-015-0133-x>.
- [7] Mínguez-Alarcón L, Chavarro JE, Gaskins AJ. Caffeine, alcohol, smoking, and reproductive outcomes among couples undergoing assisted reproductive technology treatments. *Fertil Steril* 2018;110:587–92.

- 1  
2  
3 <https://doi.org/10.1016/j.fertnstert.2018.05.026>.
- 4  
5 [8] Waylen AL, Metwally M, Jones GL, Wilkinson AJ, Ledger WL. Effects of cigarette  
6 smoking upon clinical outcomes of assisted reproduction: A meta-analysis. *Hum*  
7 *Reprod Update* 2009;15:31–44. <https://doi.org/10.1093/humupd/dmn046>.
- 8  
9  
10  
11 [9] Hornstein MD. Lifestyle and IVF Outcomes. *Reprod Sci* 2016;23:1626–9.  
12  
13 <https://doi.org/10.1177/1933719116667226>.
- 14  
15  
16 [10] Budani M, Fensore S, Di Marzio. M, Tiboni G. Cigarette smoking impairs clinical  
17 outcomes of assisted reproductive technologies: A meta-analysis of the literature.  
18 *Reprod Toxicol* 2018;80:49–59.
- 19  
20 [11] Rich-Edwards JW, Spiegelman D, Garland M, Hertzmark E, Hunter DJ, Colditz GA, et  
21 al. Physical activity, body mass index, and ovulatory disorder infertility. *Epidemiology*  
22 2002;13:184–90. <https://doi.org/10.1097/00001648-200203000-00013>.
- 23  
24 [12] Gudmundsdottir SL, Flanders WD, Augestad LB. Physical activity and fertility in  
25 women: The North-Trøndelag Health Study. *Hum Reprod* 2009;24:3196–3204.  
26  
27 <https://doi.org/10.1093/humrep/dep337>.
- 28  
29 [13] Morris SN, Missmer SA, Cramer DW, Powers RD, McShane PM, Hornstein MD.  
30 Effects of lifetime exercise on the outcome of in vitro fertilization. *Obstet Gynecol*  
31 2006;108:938–945. <https://doi.org/10.1097/01.AOG.0000235704.45652.0b>.
- 32  
33 [14] Kucuk M, Doymaz F, Urman B. Effect of energy expenditure and physical activity on  
34 the outcomes of assisted reproduction treatment. *Reprod Biomed Online* 2010:274–9.  
35  
36 <https://doi.org/10.1016/j.rbmo.2009.11.011>.
- 37  
38 [15] Kaya Y, Kizilkaya Beji N, Aydin Y, Hassa H. The effect of health-promoting lifestyle  
39 education on the treatment of unexplained female infertility. *Eur J Obstet Gynecol*  
40 *Reprod Biol* 2016;207:109–14. <https://doi.org/10.1016/j.ejogrb.2016.10.050>.
- 41  
42  
43 [16] Rao M, Zeng Z, Tang L. Maternal physical activity before IVF/ICSI cycles improves  
44  
45  
46  
47  
48  
49  
50  
51  
52  
53  
54  
55  
56  
57  
58  
59  
60

- 1  
2  
3 clinical pregnancy rate and live birth rate: A systematic review and meta-analysis.  
4  
5  
6 Reprod Biol Endocrinol 2018;16:11. <https://doi.org/10.1186/s12958-018-0328-z>.
- 7  
8 [17] Ricci E, Al Beitawi S, Cipriani S, Candiani M, Chiaffarino F, Viganò P, et al. Semen  
9  
10 quality and alcohol intake: a systematic review and meta-analysis. Reprod Biomed  
11  
12 Online 2017;34:38–47. <https://doi.org/10.1016/j.rbmo.2016.09.012>.
- 13  
14 [18] Sharma R, Harlev A, Agarwal A, Esteves SC. Cigarette Smoking and Semen Quality:  
15  
16 A New Meta-analysis Examining the Effect of the 2010 World Health Organization  
17  
18 Laboratory Methods for the Examination of Human Semen. Eur Urol 2016.  
19  
20  
21 <https://doi.org/10.1016/j.eururo.2016.04.010>.
- 22  
23 [19] Mínguez-Alarcón L, Chavarro JE, Mendiola J, Gaskins AJ, Torres-Cantero AM.  
24  
25 Physical activity is not related to semen quality in young healthy men. Fertil Steril  
26  
27 2014;102:1103–9. <https://doi.org/10.1016/j.fertnstert.2014.06.032>.
- 28  
29 [20] Vaamonde D, Da Silva-Grigoletto ME, García-Manso JM, Barrera N, Vaamonde-  
30  
31 Lemos R. Physically active men show better semen parameters and hormone values  
32  
33 than sedentary men. Eur J Appl Physiol 2012;112:3267–73.  
34  
35  
36 <https://doi.org/10.1007/s00421-011-2304-6>.
- 37  
38 [21] World Health Organisation (WHO). Global status report on alcohol and health. World  
39  
40 Heal Organ 2014.  
41  
42  
43  
44 [https://doi.org/entity/substance\\_abuse/publications/global\\_alcohol\\_report/en/index.ht](https://doi.org/entity/substance_abuse/publications/global_alcohol_report/en/index.html)  
45  
46  
47 ml.
- 48  
49 [22] Marcon A, Pesce G, Calciano L, Bellisario V, Dharmage SC, Garcia-Aymerich J, et al.  
50  
51 Trends in smoking initiation in Europe over 40 years: A retrospective cohort study.  
52  
53 PLoS One 2018;13:e0201881. <https://doi.org/10.1371/journal.pone.0201881>.
- 54  
55 [23] Loyen A, Clarke-Cornwell AM, Anderssen SA, Hagströmer M, Sardinha LB,  
56  
57 Sundquist K, et al. Sedentary Time and Physical Activity Surveillance Through  
58  
59  
60

- 1  
2  
3 Accelerometer Pooling in Four European Countries. *Sport Med* 2017;47:1421–35.  
4  
5 <https://doi.org/10.1007/s40279-016-0658-y>.  
6  
7  
8 [24] Gomes M, Figueiredo D, Teixeira L, Poveda V, Paúl C, Santos-Silva A, et al. Physical  
9  
10 inactivity among older adults across Europe based on the SHARE database. *Age*  
11  
12 *Ageing* 2017;46:71–7. <https://doi.org/10.1093/ageing/afw165>.  
13  
14 [25] Decarli A, Franceschi S, Ferraroni M, Gnagnarella P, Parpinel MT, La Vecchia C, et  
15  
16 al. Validation of a food-frequency questionnaire to assess dietary intakes in cancer  
17  
18 studies in Italy: Results for specific nutrients. *Ann Epidemiol* 1996;6:110–8.  
19  
20 [https://doi.org/10.1016/1047-2797\(95\)00129-8](https://doi.org/10.1016/1047-2797(95)00129-8).  
21  
22  
23 [26] Franceschi S, Negri E, Salvini S, Decarli A, Ferraroni M, Filiberti R, et al.  
24  
25  
26 Reproducibility of an Italian food frequency questionnaire for cancer studies: Results  
27  
28 for specific food items. *Eur J Cancer* 1993;29:2298–305. [https://doi.org/10.1016/0959-](https://doi.org/10.1016/0959-8049(93)90225-5)  
29  
30 [8049\(93\)90225-5](https://doi.org/10.1016/0959-8049(93)90225-5).  
31  
32  
33 [27] Franceschi S, Barbone F, Negri E, Decarli A, Ferraroni M, Filiberti R, et al.  
34  
35  
36 Reproducibility of an Italian food frequency questionnaire for cancer studies. Results  
37  
38 for specific nutrients. *Ann Epidemiol* 1995;5:69–75. [https://doi.org/10.1016/1047-](https://doi.org/10.1016/1047-2797(95)92893-D)  
39  
40 [2797\(95\)92893-D](https://doi.org/10.1016/1047-2797(95)92893-D).  
41  
42  
43 [28] D'Avanzo B, La Vecchia C, Katsouyanni K, Negri E, Trichopoulos D. Reliability of  
44  
45 information on cigarette smoking and beverage consumption provided by hospital  
46  
47 controls. *Epidemiology* 1996;7:312–5. <https://doi.org/10.2307/3702870>.  
48  
49 [29] Trichopoulou A, Costacou T, Bamia C, Trichopoulos D. Adherence to a Mediterranean  
50  
51 diet and survival in a Greek population. *N Engl J Med* 2003;348:2599–608.  
52  
53 <https://doi.org/10.1056/NEJMoa025039>.  
54  
55  
56 [30] Ricci E, Bravi F, Noli S, Ferrari S, De Cosmi V, La Vecchia I, et al. Mediterranean diet  
57  
58 and the risk of poor semen quality: cross-sectional analysis of men referring to an  
59  
60

- 1  
2  
3 Italian Fertility Clinic. *Andrology* 2019;7:156–62. <https://doi.org/10.1111/andr.12587>.
- 4  
5 [31] Ferraroni M, Decarli A, Franceschi S, La Vecchia C, Enard L, Negri E, et al. Validity  
6 and reproducibility of alcohol consumption in Italy. *Int J Epidemiol* 1996;25:775–82.  
7  
8 <https://doi.org/10.1093/ije/25.4.775>.
- 9  
10  
11 [32] Benaglia L, Bermejo A, Somigliana E, Faulisi S, Ragni G, Fedele L, et al. In vitro  
12 fertilization outcome in women with unoperated bilateral endometriomas. *Fertil Steril*  
13 2013;99:1714–9. <https://doi.org/10.1016/j.fertnstert.2013.01.110>.
- 14  
15 [33] Ricci E, Noli S, Cipriani S, La Vecchia I, Chiaffarino F, Ferrari S, et al. Maternal and  
16 paternal caffeine intake and art outcomes in couples referring to an Italian fertility  
17 clinic: A prospective cohort. *Nutrients* 2018;10:1116.  
18  
19 <https://doi.org/10.3390/nu10081116>.
- 20  
21 [34] Eggert J, Theobald H, Engfeldt P. Effects of alcohol consumption on female fertility  
22 during an 18-year period. *Fertil Steril* 2004;81:379–83.  
23  
24 <https://doi.org/10.1016/j.fertnstert.2003.06.018>.
- 25  
26 [35] Jensen TK, Hjollund NHI, Henriksen TB, Scheike T, Kolstad H, Giwercman A, et al.  
27 Does moderate alcohol consumption affect fertility? Follow up study among couples  
28 planning first pregnancy. *BMJ* 1998;317:505–10.  
29  
30 <https://doi.org/10.1136/bmj.317.7157.505>.
- 31  
32 [36] Fan D, Liu L, Xia Q, Wang W, Wu S, Tian G, et al. Female alcohol consumption and  
33 fecundability: A systematic review and dose-response meta-analysis. *Sci Rep*  
34 2017;7:13815. <https://doi.org/10.1038/s41598-017-14261-8>.
- 35  
36 [37] Rossi B V., Berry KF, Hornstein MD, Cramer DW, Ehrlich S, Missmer SA. Effect of  
37 alcohol consumption on in vitro fertilization. *Obstet Gynecol* 2011;117:136–42.  
38  
39 <https://doi.org/10.1097/AOG.0b013e31820090e1>.
- 40  
41 [38] Wdowiak A, Sulima M, Sadowska M, Bakalczuk G, Bojar I. Alcohol consumption and  
42  
43  
44  
45  
46  
47  
48  
49  
50  
51  
52  
53  
54  
55  
56  
57  
58  
59  
60

- 1  
2  
3 quality of embryos obtained in programmes of in vitro fertilization. *Ann Agric Environ*  
4  
5 *Med* 2014;21:450–3. <https://doi.org/10.5604/1232-1966.1108623>.
- 6  
7 [39] Abadia L, Chiu YH, Williams PL, Toth TL, Souter I, Hauser R, et al. The association  
8  
9 between pretreatment maternal alcohol and caffeine intake and outcomes of assisted  
10  
11 reproduction in a prospectively followed cohort. *Hum Reprod* 2017;32:1846–1854,.  
12  
13 <https://doi.org/10.1093/humrep/dex237>.
- 14  
15 [40] Gormack AA, Peek JC, Derraik JGB, Gluckman PD, Young NL, Cutfield WS. Many  
16  
17 women undergoing fertility treatment make poor lifestyle choices that may affect  
18  
19 treatment outcome. *Hum Reprod* 2015;30:1617–24.  
20  
21 <https://doi.org/10.1093/humrep/dev094>.
- 22  
23 [41] Dechanet C, Anahory T, Mathieu Daude JC, Quantin X, Reyftmann L, Hamamah S, et  
24  
25 al. Effects of cigarette smoking on reproduction. *Hum Reprod Update* 2011;17:79–95.  
26  
27 <https://doi.org/10.1093/humupd/dmq033>.
- 28  
29 [42] Lintsen AME, Pasker-de Jong PCM, de Boer EJ, Burger CW, Jansen CAM, Braat  
30  
31 DDM, et al. Effects of subfertility cause, smoking and body weight on the success rate  
32  
33 of IVF. *Hum Reprod* 2005;20:1867–75. <https://doi.org/10.1093/humrep/deh898>.
- 34  
35 [43] Vanegas JC, Chavarro JE, Williams PL, Ford JB, Toth TL, Hauser R, et al. Discrete  
36  
37 survival model analysis of a couple's smoking pattern and outcomes of assisted  
38  
39 reproduction. *Fertil Res Pract* 2017;3:5. <https://doi.org/10.1186/s40738-017-0032-2>.
- 40  
41 [44] Evenson KR, Calhoun KC, Herring AH, Pritchard D, Wen F, Steiner AZ. Association  
42  
43 of physical activity in the past year and immediately after in vitro fertilization on  
44  
45 pregnancy. *Fertil Steril* 2014;101:1047–54.  
46  
47 <https://doi.org/10.1016/j.fertnstert.2013.12.041>.
- 48  
49 [45] Gaskins AJ, Mendiola J, Afeiche M, Jørgensen N, Swan SH, Chavarro JE. Physical  
50  
51 activity and television watching in relation to semen quality in young men. *Br J Sports*  
52  
53  
54  
55  
56  
57  
58  
59  
60



1  
2  
3 Med 2015;49:265–70. <https://doi.org/10.1136/bjsports-2012-091644>.  
4  
5  
6  
7  
8  
9  
10  
11  
12  
13  
14  
15  
16  
17  
18  
19  
20  
21  
22  
23  
24  
25  
26  
27  
28  
29  
30  
31  
32  
33  
34  
35  
36  
37  
38  
39  
40  
41  
42  
43  
44  
45  
46  
47  
48  
49  
50  
51  
52  
53  
54  
55  
56  
57  
58  
59  
60

For peer review only

Table 1. Demographic characteristics of 492 women, according to alcohol intake, smoking habits and leisure physical activity.

|                               | Alcohol intake (g/day) |       |                         |       |                         |       |                         |       | Smoking |       |         |       |        |       | Leisure Physical Activity |       |            |       |            |       |
|-------------------------------|------------------------|-------|-------------------------|-------|-------------------------|-------|-------------------------|-------|---------|-------|---------|-------|--------|-------|---------------------------|-------|------------|-------|------------|-------|
|                               | Abstainers             |       | 1 <sup>st</sup> tertile |       | 2 <sup>nd</sup> tertile |       | 3 <sup>rd</sup> tertile |       | Never   |       | Current |       | Former |       | < 2                       |       | 2-4        |       | ≥5         |       |
|                               | 0                      |       | 0.01-2.27               |       | 2.28-5.74               |       | ≥5.75                   |       |         |       |         |       |        |       | hours/week                |       | hours/week |       | hours/week |       |
|                               | N=140                  | 28.5% | N=117                   | 23.8% | N=122                   | 24.8% | N=113                   | 23.0% | N=272   | 55.3% | N=90    | 18.3% | N=130  | 26.4% | N=256                     | 54.1% | N=175      | 35.6% | N=51       | 10.4% |
| <b>Age (years)</b>            |                        |       |                         |       |                         |       |                         |       |         |       |         |       |        |       |                           |       |            |       |            |       |
| <35                           | 46                     | 32.9  | 38                      | 32.5  | 25                      | 20.5  | 27                      | 23.9  | 71      | 26.1  | 28      | 31.1  | 38     | 29.2  | 78                        | 29.3  | 47         | 26.9  | 11         | 21.6  |
| 35-39                         | 70                     | 50.0  | 50                      | 42.7  | 64                      | 52.5  | 59                      | 52.2  | 131     | 48.2  | 46      | 51.1  | 65     | 50.0  | 123                       | 46.2  | 89         | 50.9  | 31         | 60.8  |
| ≥40                           | 24                     | 17.1  | 29                      | 24.8  | 33                      | 27.0  | 27                      | 23.9  | 70      | 25.7  | 16      | 17.8  | 27     | 20.8  | 65                        | 24.4  | 39         | 22.3  | 9          | 17.6  |
| <b>College degree</b>         | 49                     | 35.0  | 64                      | 54.7  | 70                      | 57.4  | 72                      | 63.7  | 151     | 55.5  | 35      | 28.5  | 66     | 50.8  | 120                       | 45.1  | 110        | 62.9  | 25         | 49.0  |
| <b>Cause of infertility</b>   |                        |       |                         |       |                         |       |                         |       |         |       |         |       |        |       |                           |       |            |       |            |       |
| Male factor only              | 37                     | 26.4  | 35                      | 29.9  | 33                      | 27.0  | 23                      | 20.4  | 69      | 25.4  | 22      | 24.4  | 37     | 28.5  | 68                        | 25.6  | 47         | 26.9  | 13         | 25.5  |
| Low ovarian reserve           | 26                     | 18.6  | 25                      | 21.4  | 24                      | 19.7  | 22                      | 19.5  | 55      | 20.2  | 20      | 22.2  | 22     | 16.9  | 51                        | 19.2  | 36         | 20.6  | 10         | 19.6  |
| Endometriosis                 | 27                     | 19.3  | 21                      | 18.0  | 28                      | 23.0  | 27                      | 23.9  | 52      | 19.1  | 19      | 21.1  | 32     | 24.6  | 64                        | 24.1  | 29         | 16.6  | 10         | 19.6  |
| Ovulatory                     | 10                     | 7.1   | 5                       | 4.3   | 4                       | 3.3   | 0                       | 0     | 15      | 5.5   | 0       | 0     | 4      | 3.1   | 12                        | 4.5   | 5          | 2.9   | 2          | 3.9   |
| Tubal                         | 11                     | 7.9   | 17                      | 14.5  | 11                      | 9.0   | 15                      | 13.3  | 19      | 7.0   | 16      | 17.8  | 19     | 14.6  | 26                        | 9.8   | 21         | 12.0  | 7          | 13.7  |
| Unexplained                   | 29                     | 20.7  | 14                      | 12.0  | 22                      | 18.0  | 26                      | 23.0  | 62      | 22.8  | 13      | 14.4  | 16     | 12.3  | 45                        | 16.9  | 37         | 21.1  | 9          | 17.6  |
| <b>BMI (Kg/m<sup>2</sup>)</b> |                        |       |                         |       |                         |       |                         |       |         |       |         |       |        |       |                           |       |            |       |            |       |
| <18.5                         | 12                     | 8.6   | 11                      | 9.4   | 12                      | 9.8   | 12                      | 10.6  | 28      | 10.3  | 8       | 8.9   | 11     | 8.5   | 28                        | 10.5  | 15         | 8.6   | 4          | 7.8   |
| 18.5-24.9                     | 98                     | 70.0  | 80                      | 68.4  | 97                      | 79.5  | 94                      | 83.2  | 202     | 74.3  | 67      | 74.4  | 100    | 76.9  | 190                       | 71.4  | 137        | 78.3  | 42         | 82.4  |
| 25.0-29.9                     | 16                     | 11.4  | 15                      | 12.8  | 8                       | 6.6   | 7                       | 6.2   | 26      | 9.6   | 7       | 7.8   | 13     | 10.0  | 29                        | 10.9  | 13         | 7.4   | 4          | 7.8   |
| ≥30.0                         | 14                     | 10.0  | 11                      | 9.4   | 5                       | 4.1   | 0                       | 0     | 16      | 5.9   | 8       | 8.9   | 6      | 4.6   | 19                        | 7.1   | 10         | 5.7   | 1          | 2.0   |
| <b>Occupational PA</b>        |                        |       |                         |       |                         |       |                         |       |         |       |         |       |        |       |                           |       |            |       |            |       |

|                                                    |           |             |           |             |           |             |           |             |      |       |      |       |      |       |             |              |             |              |             |              |
|----------------------------------------------------|-----------|-------------|-----------|-------------|-----------|-------------|-----------|-------------|------|-------|------|-------|------|-------|-------------|--------------|-------------|--------------|-------------|--------------|
| Heavy/moderate                                     | <b>50</b> | <b>35.7</b> | <b>27</b> | <b>23.3</b> | <b>33</b> | <b>27.1</b> | <b>28</b> | <b>24.8</b> | 70   | 25.7  | 26   | 28.9  | 42   | 32.3  | 83          | 31.3         | 40          | 22.9         | 15          | 30.0         |
| Mainly standing                                    | <b>32</b> | <b>22.9</b> | <b>30</b> | <b>25.9</b> | <b>25</b> | <b>20.5</b> | <b>19</b> | <b>16.8</b> | 58   | 21.3  | 22   | 24.4  | 26   | 20.0  | 60          | 22.6         | 32          | 18.3         | 14          | 28.0         |
| Mainly sitting                                     | <b>58</b> | <b>41.4</b> | <b>59</b> | <b>50.9</b> | <b>63</b> | <b>51.6</b> | <b>66</b> | <b>58.4</b> | 144  | 52.9  | 42   | 46.7  | 60   | 46.2  | 122         | 46.1         | 103         | 58.9         | 21          | 42.0         |
| <b>Previous ART cycle</b>                          | 84        | 60.0        | 67        | 57.3        | 69        | 56.6        | 65        | 57.5        | 165  | 60.7  | 42   | 46.7  | 78   | 60.0  | 155         | 58.3         | 98          | 56.0         | 32          | 62.8         |
| <b>Mean calories<br/>(Kcal/day), mean<br/>(SD)</b> | 1711      | (458)       | 1705      | (401)       | 1782      | (415)       | 1812      | (493)       | 1764 | (437) | 1761 | (446) | 1712 | (457) | <b>1788</b> | <b>(444)</b> | <b>1739</b> | <b>(425)</b> | <b>1597</b> | <b>(481)</b> |
| <b>Mediterranean diet<br/>Score (n=473)*</b>       |           |             |           |             |           |             |           |             |      |       |      |       |      |       |             |              |             |              |             |              |
| 0-4                                                | 51        | 38.4        | 37        | 32.5        | 33        | 28.0        | 34        | 31.5        | 75   | 28.6  | 32   | 37.2  | 25   | 20.0  | <b>79</b>   | <b>31.1</b>  | <b>41</b>   | <b>24.3</b>  | <b>12</b>   | <b>24.5</b>  |
| 5-6                                                | 53        | 39.8        | 52        | 45.6        | 53        | 44.9        | 45        | 41.7        | 113  | 43.1  | 31   | 36.1  | 56   | 44.8  | <b>110</b>  | <b>43.3</b>  | <b>73</b>   | <b>43.2</b>  | <b>16</b>   | <b>32.6</b>  |
| 7-9                                                | 29        | 21.8        | 25        | 21.9        | 32        | 27.1        | 29        | 26.8        | 74   | 28.2  | 23   | 26.7  | 44   | 35.2  | <b>65</b>   | <b>25.6</b>  | <b>55</b>   | <b>32.5</b>  | <b>21</b>   | <b>42.9</b>  |

**Bold:** p<0.05; sometimes the sums do not add up to the total because of missing values

ART: assisted reproduction technique; PA: physical activity; SD: standard deviation

\*MDS without alcohol was calculated for class of alcohol intake

**Table 2.** Relative risks for clinical outcomes of ART, in 492 women according to alcohol, smoking habits and leisure physical activity.

|                         | N   | Number of high-quality oocytes (median, Q1-Q3) | Embryo transfer |      | ARR (95% CI)     | Clinical pregnancy |      | ARR (95% CI)     | Live birth |      | ARR (95% CI)     |
|-------------------------|-----|------------------------------------------------|-----------------|------|------------------|--------------------|------|------------------|------------|------|------------------|
|                         |     |                                                | N               | %    |                  | N                  | %    |                  | N          | %    |                  |
| <b>Alcohol intake</b>   |     |                                                |                 |      |                  |                    |      |                  |            |      |                  |
| Abstainers              | 140 | 5 (3-8)                                        | 16              | 11.4 | 1                | 92                 | 65.7 | 1                | 102        | 72.9 | 1                |
| 1 <sup>st</sup> tertile | 117 | 4 (2-8)                                        | 14              | 12.0 | 0.99 (0.90-1.10) | 72                 | 61.5 | 1.11 (0.81-1.53) | 84         | 71.8 | 1.01 (0.68-1.51) |
| 2 <sup>nd</sup> tertile | 122 | 4 (3-7)                                        | 16              | 13.1 | 0.99 (0.89-1.09) | 91                 | 74.6 | 0.80 (0.54-1.18) | 98         | 80.3 | 0.77 (0.48-1.21) |
| 3 <sup>rd</sup> tertile | 113 | 5 (3-8)                                        | 19              | 16.8 | 0.97 (0.87-1.08) | 80                 | 70.8 | 0.90 (0.62-1.30) | 87         | 77.0 | 0.89 (0.57-1.37) |
| ≥1 drink/day            | 28  | 5 (3-8)                                        | 5               | 17.8 | 0.97 (0.81-1.18) | 19                 | 67.9 | 1.12 (0.62-2.00) | 20         | 71.4 | 1.31 (0.69-2.48) |
| <b>Current smoking</b>  |     |                                                |                 |      |                  |                    |      |                  |            |      |                  |
| Never                   | 272 | 5 (3-8)                                        | 34              | 12.5 | 1                | 187                | 68.8 | 1                | 209        | 76.8 | 1                |
| Current                 | 91  | 5 (3-8)                                        | 13              | 14.4 | 0.98 (0.88-1.09) | 64                 | 71.1 | 0.91 (0.62-1.33) | 68         | 75.6 | 1.09 (0.70-1.69) |
| Former                  | 130 | 5 (3-8)                                        | 18              | 13.8 | 0.99 (0.92-1.09) | 84                 | 64.6 | 1.08 (0.81-1.45) | 94         | 72.3 | 1.13 (0.80-1.60) |
| Current ≤ 5 cig/day     | 42  | 5 (3-7)                                        | 8               | 19.0 | 0.95 (0.92-1.10) | 32                 | 74.4 | 0.82 (0.49-1.39) | 34         | 79.1 | 0.92 (0.50-1.68) |
| Current > 5 cig/day     | 48  | 4 (3-8)                                        | 5               | 10.4 | 1.00 (0.88-1.16) | 32                 | 68.1 | 0.94 (0.60-1.48) | 34         | 72.3 | 1.14 (0.68-1.90) |
| Current ≥20 cig/day     | 6   | 3 (2-6)*                                       | 2               | 33.3 | 0.84 (0.54-1.32) | 5                  | 83.3 | 0.43 (0.07-2.55) | 5          | 83.3 | 0.61 (0.10-3.67) |

|                    |     |           |    |      |                  |     |      |                  |     |      |                  |
|--------------------|-----|-----------|----|------|------------------|-----|------|------------------|-----|------|------------------|
| Former (1-5 years) | 75  | 5 (3-9)   | 14 | 18.7 | 0.96 (0.86-1.07) | 51  | 68.0 | 0.99 (0.68-1.44) | 56  | 74.7 | 1.05 (0.68-1.61) |
| Former (>5 years)  | 55  | 5 (2-9)** | 4  | 7.3  | 1.03 (0.88-1.21) | 33  | 60.0 | 1.22 (0.84-1.66) | 38  | 69.1 | 1.28 (0.81-2.01) |
| <b>Leisure PA</b>  |     |           |    |      |                  |     |      |                  |     |      |                  |
| <2 h/wk            | 266 | 5 (3-8)   | 35 | 13.2 | 1                | 179 | 67.3 | 1                | 199 | 74.8 | 1                |
| 2-4                | 175 | 4 (3-8)   | 20 | 11.4 | 1.02 (0.94-1.11) | 113 | 64.6 | 1.13 (0.86-1.48) | 128 | 73.1 | 1.08 (0.68-1.50) |
| ≥5                 | 51  | 4 (2-8)   | 10 | 19.6 | 0.93 (0.79-1.08) | 43  | 84.3 | 0.44 (0.22-0.90) | 44  | 86.3 | 0.48 (0.22-1.05) |

ARR: adjusted relative risk; CI: confidence interval; PA: physical activity; the final model included age class, college degree, BMI class (<25.0, ≥25.0), occupational PA, previous ART cycles, calories intake. Cause for infertility for smoking habits, and MDS score for PA were also included.

\* p=0.047 as compared to never smokers

\*\* p=0.003 as compared to never smokers

## STROBE Statement—checklist of items that should be included in reports of observational studies

|                              | Item No | Recommendation                                                                                                                                                                                                                                                                                                                                                                                                                                                         |                    |
|------------------------------|---------|------------------------------------------------------------------------------------------------------------------------------------------------------------------------------------------------------------------------------------------------------------------------------------------------------------------------------------------------------------------------------------------------------------------------------------------------------------------------|--------------------|
| Title and abstract           | 1       | (a) Indicate the study's design with a commonly used term in the title or the abstract                                                                                                                                                                                                                                                                                                                                                                                 | Title and abstract |
|                              |         | (b) Provide in the abstract an informative and balanced summary of what was done and what was found                                                                                                                                                                                                                                                                                                                                                                    | p.2                |
| <b>Introduction</b>          |         |                                                                                                                                                                                                                                                                                                                                                                                                                                                                        |                    |
| Background/rationale         | 2       | Explain the scientific background and rationale for the investigation being reported                                                                                                                                                                                                                                                                                                                                                                                   | p. 4-5             |
| Objectives                   | 3       | State specific objectives, including any prespecified hypotheses                                                                                                                                                                                                                                                                                                                                                                                                       | p.5                |
| <b>Methods</b>               |         |                                                                                                                                                                                                                                                                                                                                                                                                                                                                        |                    |
| Study design                 | 4       | Present key elements of study design early in the paper                                                                                                                                                                                                                                                                                                                                                                                                                | p. 5               |
| Setting                      | 5       | Describe the setting, locations, and relevant dates, including periods of recruitment, exposure, follow-up, and data collection                                                                                                                                                                                                                                                                                                                                        | p. 5-6             |
| Participants                 | 6       | (a) <i>Cohort study</i> —Give the eligibility criteria, and the sources and methods of selection of participants. Describe methods of follow-up<br><i>Case-control study</i> —Give the eligibility criteria, and the sources and methods of case ascertainment and control selection. Give the rationale for the choice of cases and controls<br><i>Cross-sectional study</i> —Give the eligibility criteria, and the sources and methods of selection of participants | p. 6-7             |
|                              |         | (b) <i>Cohort study</i> —For matched studies, give matching criteria and number of exposed and unexposed<br><i>Case-control study</i> —For matched studies, give matching criteria and the number of controls per case                                                                                                                                                                                                                                                 | p. 6-7             |
| Variables                    | 7       | Clearly define all outcomes, exposures, predictors, potential confounders, and effect modifiers. Give diagnostic criteria, if applicable                                                                                                                                                                                                                                                                                                                               | p. 6-7             |
| Data sources/<br>measurement | 8*      | For each variable of interest, give sources of data and details of methods of assessment (measurement). Describe comparability of assessment methods if there is more than one group                                                                                                                                                                                                                                                                                   | p. 6-7             |
| Bias                         | 9       | Describe any efforts to address potential sources of bias                                                                                                                                                                                                                                                                                                                                                                                                              | p.8                |
| Study size                   | 10      | Explain how the study size was arrived at                                                                                                                                                                                                                                                                                                                                                                                                                              | p. 8               |
| Quantitative variables       | 11      | Explain how quantitative variables were handled in the analyses. If applicable, describe which groupings were chosen and why                                                                                                                                                                                                                                                                                                                                           | p.8                |
| Statistical methods          | 12      | (a) Describe all statistical methods, including those used to control for confounding                                                                                                                                                                                                                                                                                                                                                                                  | p.8                |
|                              |         | (b) Describe any methods used to examine subgroups and interactions                                                                                                                                                                                                                                                                                                                                                                                                    | p.8                |
|                              |         | (c) Explain how missing data were addressed                                                                                                                                                                                                                                                                                                                                                                                                                            | -                  |
|                              |         | (d) <i>Cohort study</i> —If applicable, explain how loss to follow-up was addressed<br><i>Case-control study</i> —If applicable, explain how matching of cases and controls was addressed<br><i>Cross-sectional study</i> —If applicable, describe analytical methods                                                                                                                                                                                                  | -                  |

|  |  |                                       |                         |
|--|--|---------------------------------------|-------------------------|
|  |  | taking account of sampling strategy   |                         |
|  |  | (e) Describe any sensitivity analyses | No sensitivity analyses |

Continued on next page

For peer review only

| <b>Results</b>           |     |                                                                                                                                                                                                                      |                         |
|--------------------------|-----|----------------------------------------------------------------------------------------------------------------------------------------------------------------------------------------------------------------------|-------------------------|
| Participants             | 13* | (a) Report numbers of individuals at each stage of study—eg numbers potentially eligible, examined for eligibility, confirmed eligible, included in the study, completing follow-up, and analysed                    | p.9                     |
|                          |     | (b) Give reasons for non-participation at each stage                                                                                                                                                                 | n.a.                    |
|                          |     | (c) Consider use of a flow diagram                                                                                                                                                                                   | n.a.                    |
| Descriptive data         | 14* | (a) Give characteristics of study participants (eg demographic, clinical, social) and information on exposures and potential confounders                                                                             | p.9                     |
|                          |     | (b) Indicate number of participants with missing data for each variable of interest                                                                                                                                  | p.9                     |
|                          |     | (c) <i>Cohort study</i> —Summarise follow-up time (eg, average and total amount)<br><i>Implicit: for each women, the time between ART initiation and outcome (embryo transfer, clinical pregnancy and livebirth)</i> | -                       |
| Outcome data             | 15* | <i>Cohort study</i> —Report numbers of outcome events or summary measures over time                                                                                                                                  | p.9                     |
|                          |     | <i>Case-control study</i> —Report numbers in each exposure category, or summary measures of exposure                                                                                                                 | -                       |
|                          |     | <i>Cross-sectional study</i> —Report numbers of outcome events or summary measures                                                                                                                                   | -                       |
| Main results             | 16  | (a) Give unadjusted estimates and, if applicable, confounder-adjusted estimates and their precision (eg, 95% confidence interval). Make clear which confounders were adjusted for and why they were included         | p.9-10<br>Table 1 and 2 |
|                          |     | (b) Report category boundaries when continuous variables were categorized                                                                                                                                            | p.9-10<br>Table 1 and 2 |
|                          |     | (c) If relevant, consider translating estimates of relative risk into absolute risk for a meaningful time period                                                                                                     | -                       |
| Other analyses           | 17  | Report other analyses done—eg analyses of subgroups and interactions, and sensitivity analyses                                                                                                                       | p. 9                    |
| <b>Discussion</b>        |     |                                                                                                                                                                                                                      |                         |
| Key results              | 18  | Summarise key results with reference to study objectives                                                                                                                                                             | p.11                    |
| Limitations              | 19  | Discuss limitations of the study, taking into account sources of potential bias or imprecision. Discuss both direction and magnitude of any potential bias                                                           | p.14                    |
| Interpretation           | 20  | Give a cautious overall interpretation of results considering objectives, limitations, multiplicity of analyses, results from similar studies, and other relevant evidence                                           | p.11-13                 |
| Generalisability         | 21  | Discuss the generalisability (external validity) of the study results                                                                                                                                                | p.14                    |
| <b>Other information</b> |     |                                                                                                                                                                                                                      |                         |
| Funding                  | 22  | Give the source of funding and the role of the funders for the present study and, if applicable, for the original study on which the present article is based                                                        | p. 16                   |

\*Give information separately for cases and controls in case-control studies and, if applicable, for exposed and unexposed groups in cohort and cross-sectional studies.

**Note:** An Explanation and Elaboration article discusses each checklist item and gives methodological background and published examples of transparent reporting. The STROBE checklist is best used in conjunction with this article (freely available on the Web sites of PLoS Medicine at <http://www.plosmedicine.org/>, Annals of Internal Medicine at <http://www.annals.org/>, and Epidemiology at <http://www.epidem.com/>). Information on the STROBE Initiative is available at [www.strobe-statement.org](http://www.strobe-statement.org).
